# Supplementary material for: Sex-biased regulatory changes in the placenta of native highlanders contribute to adaptive fetal development
Source: eLife. 2024 Jun 13;12:RP89004. doi: 10.7554/eLife.89004 (PMC11175615; doi:10.7554/eLife.89004)
Supplement: Supplementary file 1. [file elife-89004-supp1.xlsx]

## Sheet: a
supplementary file 1a. Sample information
Layers	Description	Sample size	Tibetan/Han	Male/female
UC	umbilical cord	62	33/29	33/29
AN	amnion	61	32/29	34/27
CN	chorion	68	35/33	37/31
CP	chorionic plate	65	33/32	35/30
VF	villus of fetal	62	33/29	33/29
VI	villus of intermediate	65	34/31	33/32
VM	villus of maternal	65	33/32	34/31
Total	-	448	233/215	239/209

## Sheet: b
supplementary file 1b. The identified DEGs in the seven layers of placenta between Tibetans and Han migrants.
Gene	log2FoldChange	pvalue	padj	layer
ENSG00000279689_AC022400.9	-0.551385	2.00877e-05	0.0167107	UC
ENSG00000107738_VSIR	-0.537104	1.64741e-05	0.0158759	UC
ENSG00000168071_CCDC88B	-0.528691	5.06727e-06	0.00583672	UC
ENSG00000261888_AC144831.1	-0.418012	8.74001e-05	0.0347596	UC
ENSG00000269343_ZNF587B	-0.41024	3.08397e-07	0.000577242	UC
ENSG00000256087_ZNF432	-0.328621	1.81031e-06	0.00271076	UC
ENSG00000116016_EPAS1	-0.315291	8.61174e-05	0.0347596	UC
ENSG00000069424_KCNAB2	-0.304432	0.00014222	0.044942	UC
ENSG00000104885_DOT1L	-0.301409	8.43205e-05	0.0347596	UC
ENSG00000205356_TECPR1	-0.271024	5.86725e-05	0.0274551	UC
ENSG00000168487_BMP1	-0.269991	4.10206e-05	0.0219372	UC
ENSG00000032444_PNPLA6	-0.252277	0.000104223	0.0379934	UC
ENSG00000103043_VAC14	-0.237749	2.79026e-05	0.0189916	UC
ENSG00000137216_TMEM63B	-0.233059	0.00012245	0.0398603	UC
ENSG00000108819_PPP1R9B	-0.223229	0.000111641	0.0379934	UC
ENSG00000156860_FBRS	-0.209369	0.000119911	0.0398603	UC
ENSG00000125447_GGA3	-0.194968	3.7193e-05	0.0217374	UC
ENSG00000204304_PBX2	-0.166314	5.55863e-05	0.02685	UC
ENSG00000073584_SMARCE1	0.150524	3.19731e-05	0.0206537	UC
ENSG00000012963_UBR7	0.151575	4.45904e-05	0.023024	UC
ENSG00000143889_HNRNPLL	0.194082	4.06752e-05	0.0219372	UC
ENSG00000145241_CENPC	0.196819	0.000109785	0.0379934	UC
ENSG00000237036_ZEB1-AS1	0.277161	0.00010209	0.0379934	UC
ENSG00000185973_TMLHE	0.289082	1.97045e-05	0.0167107	UC
ENSG00000218283_MORF4L1P1	0.358309	1.2142e-06	0.00202015	UC
ENSG00000138744_NAAA	0.372636	4.77369e-05	0.0238271	UC
ENSG00000182621_PLCB1	0.390375	6.74306e-06	0.00721219	UC
ENSG00000236552_RPL13AP5	0.522477	8.82104e-05	0.0347596	UC
ENSG00000213553_RPLP0P6	0.526047	2.43144e-05	0.0182042	UC
ENSG00000234797_RPS3AP6	0.528428	3.31033e-05	0.0206537	UC
ENSG00000242071_RPL7AP6	0.604184	2.20027e-05	0.0173405	UC
ENSG00000275895_U2AF1L5	0.611042	0.000109768	0.0379934	UC
ENSG00000283041_AC008038.1	0.625279	2.19249e-07	0.000469005	UC
ENSG00000137970_RPL7P9	0.630859	3.48879e-06	0.00436135	UC
ENSG00000166896_ATP23	0.64041	7.59096e-05	0.0334315	UC
ENSG00000220842_RPL21P16	0.665305	0.000157077	0.0480013	UC
ENSG00000204196_RPL12P16	0.697698	0.000144064	0.044942	UC
ENSG00000224631_RPS27AP16	0.698549	3.77436e-05	0.0217374	UC
ENSG00000232472_EEF1B2P3	0.70605	2.65951e-05	0.0189636	UC
ENSG00000178464_RPL10P16	0.708075	1.69637e-05	0.0158759	UC
ENSG00000214485_RPL7P1	0.730662	2.01141e-09	1.00396e-05	UC
ENSG00000213442_RPL18AP3	0.741774	3.49514e-06	0.00436135	UC
ENSG00000244716_BX679664.3	0.753412	6.97128e-05	0.0316327	UC
ENSG00000218426_AL590867.2	0.970409	3.2531e-08	0.00012178	UC
ENSG00000128606_LRRC17	0.988248	9.40577e-05	0.0361133	UC
ENSG00000108947_EFNB3	1.04765	1.2825e-07	0.00032007	UC
ENSG00000171236_LRG1	-2.11478	1.61605e-05	0.0249112	AN
ENSG00000139626_ITGB7	-1.27232	5.56694e-05	0.0352893	AN
ENSG00000161643_SIGLEC16	-1.24936	2.14351e-05	0.0249112	AN
ENSG00000157193_LRP8	-1.09351	3.21572e-05	0.0263803	AN
ENSG00000130475_FCHO1	-1.0799	1.94651e-05	0.0249112	AN
ENSG00000196656_AC004057.1	-0.883299	8.4767e-06	0.0197027	AN
ENSG00000178537_SLC25A20	-0.822668	3.16611e-05	0.0263803	AN
ENSG00000105963_ADAP1	-0.638169	2.12315e-06	0.0148048	AN
ENSG00000256269_HMBS	-0.609824	5.26831e-05	0.0352893	AN
ENSG00000155393_HEATR3	-0.504711	5.9944e-07	0.00835979	AN
ENSG00000129925_TMEM8A	-0.470326	4.16455e-05	0.030949	AN
ENSG00000072062_PRKACA	-0.287326	7.69394e-05	0.0427505	AN
ENSG00000172269_DPAGT1	-0.272113	6.5399e-05	0.0380023	AN
ENSG00000121067_SPOP	0.247881	4.05661e-06	0.0159171	AN
ENSG00000198783_ZNF830	0.289403	1.60077e-05	0.0249112	AN
ENSG00000134046_MBD2	0.311567	8.5832e-05	0.0427505	AN
ENSG00000269834_ZNF528-AS1	0.532434	3.06056e-05	0.0263803	AN
ENSG00000214174_AMZ2P1	0.538262	2.12168e-05	0.0249112	AN
ENSG00000273247_AC097376.2	0.639251	5.4907e-05	0.0352893	AN
ENSG00000062716_VMP1	0.6407	8.38376e-05	0.0427505	AN
ENSG00000283041_AC008038.1	0.668506	4.56536e-06	0.0159171	AN
ENSG00000213553_RPLP0P6	0.69959	9.32131e-05	0.0448259	AN
ENSG00000128422_KRT17	0.732448	2.60989e-05	0.0263803	AN
ENSG00000224081_SLC44A3-AS1	0.773121	8.53149e-05	0.0427505	AN
ENSG00000178464_RPL10P16	0.804471	4.21649e-05	0.030949	AN
ENSG00000137970_RPL7P9	0.816553	2.99528e-05	0.0263803	AN
ENSG00000218426_AL590867.2	0.954418	7.51895e-06	0.0197027	AN
ENSG00000108551_RASD1	1.25376	5.95691e-05	0.0361196	AN
ENSG00000213178_RPL22P1	1.45206	1.29922e-05	0.0249112	AN
ENSG00000179344_HLA-DQB1	-1.66919	6.71837e-07	0.00336344	CN
ENSG00000143184_XCL1	-1.0899	1.9017e-05	0.0354125	CN
ENSG00000228589_SPCS2P4	0.701732	1.45296e-05	0.034932	CN
ENSG00000269821_KCNQ1OT1	0.755638	2.12206e-05	0.0354125	CN
ENSG00000187534_PRR13P5	0.8666	1.98453e-06	0.00745142	CN
ENSG00000196205_EEF1A1P5	1.03517	1.39166e-05	0.034932	CN
ENSG00000228253_MT-ATP8	1.06494	5.83822e-07	0.00336344	CN
ENSG00000164379_FOXQ1	1.16867	1.6281e-05	0.034932	CN
ENSG00000284969_AL049629.2	1.92143	2.45196e-07	0.00336344	CN
ENSG00000206047_DEFA1	-1.66599	2.40646e-05	0.0412681	CP
ENSG00000196656_AC004057.1	-0.809538	1.44528e-05	0.0371774	CP
ENSG00000230630_DNM3OS	-0.671258	2.07363e-05	0.0400056	CP
ENSG00000124571_XPO5	-0.211133	1.63713e-06	0.00880034	CP
ENSG00000104472_CHRAC1	0.19928	1.71057e-06	0.00880034	CP
ENSG00000108799_EZH1	0.21845	1.30189e-05	0.0371774	CP
ENSG00000131470_PSMC3IP	0.330057	5.62596e-07	0.0086831	CP
ENSG00000100906_NFKBIA	0.441717	3.41226e-06	0.0131662	CP
ENSG00000180509_KCNE1	0.879801	1.9159e-05	0.0400056	CP
ENSG00000142623_PADI1	-1.75284	1.7252e-08	0.000131866	VF
ENSG00000166863_TAC3	-1.58688	0.000300869	0.0407025	VF
ENSG00000169245_CXCL10	-1.19858	7.81922e-05	0.0250768	VF
ENSG00000183691_NOG	-1.16283	0.000347953	0.0418422	VF
ENSG00000007171_NOS2	-1.15383	9.96817e-05	0.0262463	VF
ENSG00000070404_FSTL3	-1.15194	0.000143424	0.0318899	VF
ENSG00000179761_PIPOX	-1.07442	0.000157118	0.0318899	VF
ENSG00000146070_PLA2G7	-0.996967	7.43835e-06	0.00874693	VF
ENSG00000145287_PLAC8	-0.973281	3.05154e-06	0.00653732	VF
ENSG00000183010_PYCR1	-0.937143	2.06446e-05	0.0134601	VF
ENSG00000196126_HLA-DRB1	-0.909305	0.000369225	0.0421343	VF
ENSG00000164007_CLDN19	-0.88088	0.000298064	0.0407025	VF
ENSG00000075275_CELSR1	-0.879652	5.71026e-05	0.0221258	VF
ENSG00000163736_PPBP	-0.868392	0.00018789	0.0346132	VF
ENSG00000042980_ADAM28	-0.827519	0.00022388	0.0358979	VF
ENSG00000196656_AC004057.1	-0.778494	1.25641e-05	0.0118514	VF
ENSG00000110665_C11orf21	-0.756928	1.65554e-06	0.00506166	VF
ENSG00000230630_DNM3OS	-0.721233	0.000238498	0.0368275	VF
ENSG00000143320_CRABP2	-0.717758	5.92528e-05	0.0221258	VF
ENSG00000135919_SERPINE2	-0.692467	0.00021409	0.0352056	VF
ENSG00000185745_IFIT1	-0.68573	2.78045e-06	0.00653732	VF
ENSG00000100167_SEPT3	-0.680769	9.6325e-05	0.0262463	VF
ENSG00000100196_KDELR3	-0.668781	1.59058e-05	0.0127975	VF
ENSG00000185291_IL3RA	-0.652694	0.000333924	0.0418422	VF
ENSG00000160539_PLPP7	-0.620805	0.000353499	0.0418422	VF
ENSG00000139278_GLIPR1	-0.605116	1.31794e-05	0.0118514	VF
ENSG00000235609_AF127577.4	-0.594573	0.000298836	0.0407025	VF
ENSG00000240583_AQP1	-0.593155	0.000149969	0.0318899	VF
ENSG00000187608_ISG15	-0.59031	4.87502e-05	0.0212927	VF
ENSG00000174175_SELP	-0.558345	0.000436848	0.0433816	VF
ENSG00000203747_FCGR3A	-0.539062	5.54106e-05	0.0221258	VF
ENSG00000135905_DOCK10	-0.5387	0.00043986	0.0433816	VF
ENSG00000115339_GALNT3	-0.519784	0.000415349	0.0433816	VF
ENSG00000152952_PLOD2	-0.519265	1.01177e-05	0.0109653	VF
ENSG00000038945_MSR1	-0.515977	0.000149369	0.0318899	VF
ENSG00000237651_C2orf74	-0.512484	0.000444457	0.0435539	VF
ENSG00000142798_HSPG2	-0.512385	0.000388435	0.0424976	VF
ENSG00000262370_AC108134.3	-0.503667	0.000330279	0.0418422	VF
ENSG00000139679_LPAR6	-0.502726	0.000191879	0.0346132	VF
ENSG00000126264_HCST	-0.502449	0.000126271	0.0295052	VF
ENSG00000089127_OAS1	-0.500658	8.70365e-05	0.0250768	VF
ENSG00000155367_PPM1J	-0.496295	0.000152795	0.0318899	VF
ENSG00000196526_AFAP1	-0.494869	0.000189309	0.0346132	VF
ENSG00000181458_TMEM45A	-0.494368	0.000158301	0.0318899	VF
ENSG00000184979_USP18	-0.490019	0.000100348	0.0262463	VF
ENSG00000204267_TAP2	-0.483433	0.000430708	0.0433816	VF
ENSG00000079257_LXN	-0.481529	0.000211757	0.0352056	VF
ENSG00000185436_IFNLR1	-0.474319	0.000476934	0.0450055	VF
ENSG00000140416_TPM1	-0.465665	0.000274895	0.0391028	VF
ENSG00000119922_IFIT2	-0.44286	6.66461e-05	0.0241869	VF
ENSG00000221963_APOL6	-0.438662	0.000384922	0.0424976	VF
ENSG00000005844_ITGAL	-0.436982	4.86855e-05	0.0212927	VF
ENSG00000205413_SAMD9	-0.43491	0.000199252	0.0346132	VF
ENSG00000197496_SLC2A10	-0.434244	0.000405899	0.0433816	VF
ENSG00000137509_PRCP	-0.434137	3.42111e-06	0.00653732	VF
ENSG00000176485_PLA2G16	-0.422024	0.000234235	0.0365382	VF
ENSG00000102743_SLC25A15	-0.420627	0.000267089	0.0391028	VF
ENSG00000143891_GALM	-0.4201	0.000273197	0.0391028	VF
ENSG00000154146_NRGN	-0.400379	4.20023e-05	0.0200653	VF
ENSG00000146966_DENND2A	-0.393859	0.000197343	0.0346132	VF
ENSG00000137124_ALDH1B1	-0.38653	0.000474265	0.0450055	VF
ENSG00000123131_PRDX4	-0.384318	0.000376776	0.0424976	VF
ENSG00000134326_CMPK2	-0.383483	0.000127386	0.0295052	VF
ENSG00000111879_FAM184A	-0.359514	0.000411426	0.0433816	VF
ENSG00000132274_TRIM22	-0.357702	2.87568e-05	0.0157002	VF
ENSG00000164294_GPX8	-0.335204	0.000310864	0.0410543	VF
ENSG00000106080_FKBP14	-0.327464	0.000210639	0.0352056	VF
ENSG00000140743_CDR2	-0.323422	0.000118998	0.0288751	VF
ENSG00000076706_MCAM	-0.315811	0.000352479	0.0418422	VF
ENSG00000166710_B2M	-0.309143	8.71958e-05	0.0250768	VF
ENSG00000138764_CCNG2	-0.301345	0.000369333	0.0421343	VF
ENSG00000136156_ITM2B	-0.299753	0.000101297	0.0262463	VF
ENSG00000150540_HNMT	-0.297285	9.02221e-05	0.0250768	VF
ENSG00000138182_KIF20B	-0.295398	0.000455716	0.0438147	VF
ENSG00000159128_IFNGR2	-0.282795	0.00021648	0.0352056	VF
ENSG00000139687_RB1	-0.279673	0.000199092	0.0346132	VF
ENSG00000107201_DDX58	-0.27774	0.000500072	0.0461602	VF
ENSG00000126790_L3HYPDH	-0.264251	0.000539843	0.0482607	VF
ENSG00000099785_MARCH2	-0.254892	0.000194684	0.0346132	VF
ENSG00000177954_RPS27	-0.242118	4.33384e-05	0.0200762	VF
ENSG00000260916_CCPG1	-0.240056	0.00024583	0.03758	VF
ENSG00000154978_VOPP1	-0.23433	0.000391977	0.0424976	VF
ENSG00000139291_TMEM19	-0.232455	0.00049039	0.0458794	VF
ENSG00000165506_DNAAF2	-0.227386	0.000276254	0.0391028	VF
ENSG00000117054_ACADM	-0.224878	0.000492197	0.0458794	VF
ENSG00000109689_STIM2	-0.22287	0.000167446	0.0328172	VF
ENSG00000241343_RPL36A	-0.207796	0.000452728	0.0438147	VF
ENSG00000198918_RPL39	-0.203017	0.000275409	0.0391028	VF
ENSG00000124614_RPS10	-0.200478	0.000311526	0.0410543	VF
ENSG00000149932_TMEM219	-0.197504	0.000526899	0.047661	VF
ENSG00000163636_PSMD6	0.089171	0.000326286	0.0418422	VF
ENSG00000131508_UBE2D2	0.105745	0.000349894	0.0418422	VF
ENSG00000116350_SRSF4	0.113323	0.000350826	0.0418422	VF
ENSG00000075856_SART3	0.121598	8.97788e-05	0.0250768	VF
ENSG00000104824_HNRNPL	0.122133	0.000123827	0.0295052	VF
ENSG00000108344_PSMD3	0.126355	0.000439117	0.0433816	VF
ENSG00000165280_VCP	0.128069	0.000158542	0.0318899	VF
ENSG00000187555_USP7	0.12815	0.000402985	0.0433816	VF
ENSG00000120948_TARDBP	0.128179	0.000227273	0.0358979	VF
ENSG00000169016_E2F6	0.132393	0.000453299	0.0438147	VF
ENSG00000131828_PDHA1	0.13701	0.000470249	0.0449293	VF
ENSG00000184708_EIF4ENIF1	0.139703	0.000509213	0.0466128	VF
ENSG00000214753_HNRNPUL2	0.153541	0.000525061	0.047661	VF
ENSG00000198060_MARCH5	0.156149	0.000438409	0.0433816	VF
ENSG00000165861_ZFYVE1	0.158188	0.000191147	0.0346132	VF
ENSG00000161533_ACOX1	0.166657	2.76134e-05	0.0156343	VF
ENSG00000139197_PEX5	0.173185	5.73436e-05	0.0221258	VF
ENSG00000013561_RNF14	0.177323	8.88467e-05	0.0250768	VF
ENSG00000119537_KDSR	0.195238	0.000110865	0.0277836	VF
ENSG00000143376_SNX27	0.197091	7.55241e-05	0.0250768	VF
ENSG00000177733_HNRNPA0	0.198076	0.000165407	0.0328172	VF
ENSG00000151929_BAG3	0.204251	0.000413204	0.0433816	VF
ENSG00000204842_ATXN2	0.20583	0.000170065	0.0329087	VF
ENSG00000197872_FAM49A	0.215105	0.000142772	0.0318899	VF
ENSG00000103381_CPPED1	0.222625	2.64099e-05	0.0156343	VF
ENSG00000174996_KLC2	0.22277	0.000552334	0.0488066	VF
ENSG00000113391_FAM172A	0.225374	0.000146405	0.0318899	VF
ENSG00000108256_NUFIP2	0.226709	0.000426825	0.0433816	VF
ENSG00000111321_LTBR	0.232682	1.99691e-05	0.0134601	VF
ENSG00000137710_RDX	0.233185	0.000383747	0.0424976	VF
ENSG00000141458_NPC1	0.245768	8.60776e-05	0.0250768	VF
ENSG00000177425_PAWR	0.250624	8.77478e-05	0.0250768	VF
ENSG00000241839_PLEKHO2	0.251067	3.37771e-05	0.0178052	VF
ENSG00000153046_CDYL	0.257775	0.000184072	0.0346132	VF
ENSG00000070778_PTPN21	0.258479	0.00043398	0.0433816	VF
ENSG00000090020_SLC9A1	0.270804	1.50177e-05	0.0127542	VF
ENSG00000162407_PLPP3	0.277153	5.93417e-05	0.0221258	VF
ENSG00000163931_TKT	0.278534	1.07594e-05	0.0109653	VF
ENSG00000108219_TSPAN14	0.286284	4.27568e-06	0.00680616	VF
ENSG00000161011_SQSTM1	0.296041	0.000227782	0.0358979	VF
ENSG00000155849_ELMO1	0.297195	7.12848e-05	0.0247666	VF
ENSG00000107738_VSIR	0.298805	0.000501249	0.0461602	VF
ENSG00000076356_PLXNA2	0.301091	5.51983e-05	0.0221258	VF
ENSG00000171631_P2RY6	0.30128	0.000105907	0.0269832	VF
ENSG00000152137_HSPB8	0.305164	0.000325965	0.0418422	VF
ENSG00000197375_SLC22A5	0.307656	0.000158178	0.0318899	VF
ENSG00000122512_PMS2	0.339078	0.000366322	0.0421343	VF
ENSG00000092068_SLC7A8	0.344567	0.000299842	0.0407025	VF
ENSG00000139567_ACVRL1	0.348792	0.000257632	0.0389011	VF
ENSG00000162852_CNST	0.365578	0.000335275	0.0418422	VF
ENSG00000130695_CEP85	0.375863	0.00030519	0.0409248	VF
ENSG00000126767_ELK1	0.38836	0.00032568	0.0418422	VF
ENSG00000176092_CRYBG2	0.388479	0.000204296	0.0350907	VF
ENSG00000131873_CHSY1	0.424222	0.00011419	0.0281552	VF
ENSG00000271303_SRXN1	0.43504	0.000362674	0.0421343	VF
ENSG00000108786_HSD17B1	0.450153	2.00639e-05	0.0134601	VF
ENSG00000198142_SOWAHC	0.453673	0.000387062	0.0424976	VF
ENSG00000269374_AC011497.2	0.466366	0.000424526	0.0433816	VF
ENSG00000198431_TXNRD1	0.467554	0.000341653	0.0418422	VF
ENSG00000239887_C1orf226	0.480442	6.80341e-05	0.0241869	VF
ENSG00000120875_DUSP4	0.499578	3.61218e-05	0.0184065	VF
ENSG00000213853_EMP2	0.518098	4.45225e-06	0.00680616	VF
ENSG00000152465_NMT2	0.522079	0.000355824	0.0418422	VF
ENSG00000236283_AC019197.1	0.522309	2.11318e-05	0.0134601	VF
ENSG00000109189_USP46	0.52424	0.000288336	0.0404385	VF
ENSG00000267934_AC010300.1	0.535496	0.000391456	0.0424976	VF
ENSG00000186787_SPIN2B	0.543817	8.23728e-05	0.0250768	VF
ENSG00000198929_NOS1AP	0.548127	2.75342e-05	0.0156343	VF
ENSG00000144868_TMEM108	0.561938	7.61137e-05	0.0250768	VF
ENSG00000229644_NAMPTP1	0.574382	1.71548e-05	0.0131123	VF
ENSG00000213442_RPL18AP3	0.627898	0.000259561	0.0389011	VF
ENSG00000123009_NME2P1	0.655115	0.000266347	0.0391028	VF
ENSG00000274020_LINC01138	0.656334	3.88982e-05	0.0191819	VF
ENSG00000168874_ATOH8	0.676138	0.000546593	0.04858	VF
ENSG00000235033_AL590999.1	0.705902	0.000537394	0.0482607	VF
ENSG00000279662_AC131649.2	0.717785	7.42115e-07	0.00283618	VF
ENSG00000227733_AC239809.3	0.793513	2.06855e-07	0.00105406	VF
ENSG00000166676_TVP23A	0.800664	6.73154e-06	0.00857542	VF
ENSG00000108785_HSD17B1P1	0.829091	6.34419e-06	0.00857542	VF
ENSG00000196205_EEF1A1P5	0.86475	0.000434502	0.0433816	VF
ENSG00000180155_LYNX1	0.879291	0.00034357	0.0418422	VF
ENSG00000228253_MT-ATP8	0.976509	0.00021439	0.0352056	VF
ENSG00000180509_KCNE1	1.16819	1.39159e-08	0.000131866	VF
ENSG00000166863_TAC3	-1.84781	3.2693e-05	0.0129488	VI
ENSG00000196611_MMP1	-1.43208	0.000348423	0.0313076	VI
ENSG00000169245_CXCL10	-1.39103	5.39384e-06	0.00516469	VI
ENSG00000019169_MARCO	-0.968034	0.000145225	0.0221091	VI
ENSG00000115523_GNLY	-0.929292	0.0002828	0.0298982	VI
ENSG00000143196_DPT	-0.911572	0.000181185	0.0244102	VI
ENSG00000196126_HLA-DRB1	-0.879643	3.51671e-05	0.0130581	VI
ENSG00000154451_GBP5	-0.857655	2.89288e-05	0.0122337	VI
ENSG00000108700_CCL8	-0.848464	0.000813269	0.0453524	VI
ENSG00000261838_AC092718.6	-0.83227	0.000502575	0.0363084	VI
ENSG00000185291_IL3RA	-0.821699	5.42794e-06	0.00516469	VI
ENSG00000196656_AC004057.1	-0.778548	1.20664e-05	0.0079869	VI
ENSG00000105374_NKG7	-0.759644	0.000193516	0.0245469	VI
ENSG00000230630_DNM3OS	-0.72305	8.93769e-05	0.0187938	VI
ENSG00000117594_HSD11B1	-0.701059	3.40222e-05	0.0129488	VI
ENSG00000064692_SNCAIP	-0.696012	0.000261322	0.0286214	VI
ENSG00000188820_CALHM6	-0.68121	2.1286e-05	0.0107951	VI
ENSG00000203747_FCGR3A	-0.637312	2.46305e-06	0.00382629	VI
ENSG00000110665_C11orf21	-0.635794	0.00074839	0.0438195	VI
ENSG00000181458_TMEM45A	-0.590915	0.000404437	0.0337276	VI
ENSG00000126264_HCST	-0.577053	2.87054e-05	0.0122337	VI
ENSG00000123843_C4BPB	-0.558439	0.00017615	0.0239438	VI
ENSG00000187608_ISG15	-0.554033	0.000359626	0.0314652	VI
ENSG00000139679_LPAR6	-0.539649	8.53524e-05	0.0185629	VI
ENSG00000170323_FABP4	-0.537153	0.000508729	0.0363084	VI
ENSG00000136514_RTP4	-0.536966	0.000841301	0.0454432	VI
ENSG00000239713_APOBEC3G	-0.52418	2.5659e-06	0.00382629	VI
ENSG00000124019_FAM124B	-0.523671	0.000309477	0.0299921	VI
ENSG00000096996_IL12RB1	-0.522075	8.35443e-05	0.0185629	VI
ENSG00000229043_AC091729.3	-0.508741	4.94977e-05	0.0160206	VI
ENSG00000005961_ITGA2B	-0.505073	4.88759e-05	0.0160206	VI
ENSG00000144063_MALL	-0.50346	0.000351072	0.0313076	VI
ENSG00000038945_MSR1	-0.491345	8.17768e-05	0.0185629	VI
ENSG00000184979_USP18	-0.485688	0.000293842	0.0299921	VI
ENSG00000163106_HPGDS	-0.485527	0.000467147	0.0355592	VI
ENSG00000107611_CUBN	-0.485196	0.000775013	0.0445597	VI
ENSG00000111671_SPSB2	-0.479207	0.000529949	0.0368066	VI
ENSG00000268001_CARD8-AS1	-0.472572	9.83778e-07	0.00309424	VI
ENSG00000112799_LY86	-0.459422	0.00010161	0.0191427	VI
ENSG00000183615_FAM167B	-0.457564	0.000797072	0.0448604	VI
ENSG00000196154_S100A4	-0.457286	0.000487337	0.0362946	VI
ENSG00000139899_CBLN3	-0.453023	0.000749791	0.0438195	VI
ENSG00000165949_IFI27	-0.452123	0.000971026	0.048628	VI
ENSG00000162654_GBP4	-0.445934	9.85401e-05	0.0191427	VI
ENSG00000240065_PSMB9	-0.441366	0.000201387	0.0249261	VI
ENSG00000110852_CLEC2B	-0.430828	0.000507245	0.0363084	VI
ENSG00000187796_CARD9	-0.422273	0.000238533	0.0274156	VI
ENSG00000134326_CMPK2	-0.419238	0.00069292	0.041894	VI
ENSG00000143429_AC116050.1	-0.412093	0.00024684	0.0276212	VI
ENSG00000165533_TTC8	-0.402921	8.67143e-05	0.0185935	VI
ENSG00000103490_PYCARD	-0.39506	0.000234048	0.0271996	VI
ENSG00000005844_ITGAL	-0.394245	0.000452702	0.0349845	VI
ENSG00000204642_HLA-F	-0.39407	0.000117631	0.0208234	VI
ENSG00000204482_LST1	-0.390733	0.000407087	0.0337276	VI
ENSG00000137509_PRCP	-0.390657	0.000272467	0.0290072	VI
ENSG00000242574_HLA-DMB	-0.384669	0.000660684	0.0407908	VI
ENSG00000006282_SPATA20	-0.384335	7.03306e-05	0.0185629	VI
ENSG00000129465_RIPK3	-0.380824	0.000301414	0.0299921	VI
ENSG00000173372_C1QA	-0.378412	6.49556e-06	0.00581697	VI
ENSG00000140968_IRF8	-0.377681	0.000101849	0.0191427	VI
ENSG00000187601_MAGEH1	-0.371191	0.000953937	0.0485819	VI
ENSG00000139970_RTN1	-0.36647	0.000407953	0.0337276	VI
ENSG00000173369_C1QB	-0.364426	9.52465e-05	0.0190794	VI
ENSG00000138964_PARVG	-0.352871	0.000859157	0.0457336	VI
ENSG00000205542_TMSB4X	-0.351056	1.21949e-06	0.00309424	VI
ENSG00000164294_GPX8	-0.350839	0.000406246	0.0337276	VI
ENSG00000015133_CCDC88C	-0.346536	0.000585689	0.0384333	VI
ENSG00000106560_GIMAP2	-0.342607	0.000162005	0.0232676	VI
ENSG00000148908_RGS10	-0.3424	0.000368806	0.0319017	VI
ENSG00000188010_MORN2	-0.341601	0.000870928	0.0461986	VI
ENSG00000263528_IKBKE	-0.341266	0.000419858	0.0343652	VI
ENSG00000168961_LGALS9	-0.338508	0.000151093	0.0225485	VI
ENSG00000105974_CAV1	-0.336081	0.000397425	0.0336133	VI
ENSG00000179144_GIMAP7	-0.333451	0.00050967	0.0363084	VI
ENSG00000177954_RPS27	-0.330506	1.213e-07	0.00184667	VI
ENSG00000166710_B2M	-0.329369	2.2388e-05	0.0107951	VI
ENSG00000136161_RCBTB2	-0.323276	0.000693785	0.041894	VI
ENSG00000198113_TOR4A	-0.318466	0.000558318	0.037792	VI
ENSG00000100300_TSPO	-0.316078	0.000966915	0.0485819	VI
ENSG00000177700_POLR2L	-0.315791	0.000726161	0.0429238	VI
ENSG00000151117_TMEM86A	-0.308607	0.000656493	0.0407908	VI
ENSG00000164659_KIAA1324L	-0.307786	0.000576759	0.0383431	VI
ENSG00000144401_METTL21A	-0.306573	1.28898e-05	0.00817644	VI
ENSG00000133574_GIMAP4	-0.306086	8.263e-05	0.0185629	VI
ENSG00000123131_PRDX4	-0.304621	0.000550897	0.0377683	VI
ENSG00000150433_TMEM218	-0.302541	2.65739e-05	0.0118989	VI
ENSG00000198918_RPL39	-0.301479	2.52964e-07	0.00192556	VI
ENSG00000146386_ABRACL	-0.301053	7.67008e-05	0.0185629	VI
ENSG00000149781_FERMT3	-0.293173	8.33706e-05	0.0185629	VI
ENSG00000150540_HNMT	-0.293155	0.000787724	0.0447474	VI
ENSG00000125170_DOK4	-0.292502	0.000661806	0.0407908	VI
ENSG00000130255_RPL36	-0.292122	5.52723e-05	0.0171728	VI
ENSG00000204264_PSMB8	-0.291652	0.000528315	0.0368066	VI
ENSG00000168268_NT5DC2	-0.290548	0.000464571	0.0355592	VI
ENSG00000106605_BLVRA	-0.286168	0.000168147	0.0234851	VI
ENSG00000183161_FANCF	-0.284545	6.83165e-05	0.0185629	VI
ENSG00000196437_ZNF569	-0.283769	0.000480021	0.0361154	VI
ENSG00000182287_AP1S2	-0.280042	0.000781301	0.0447163	VI
ENSG00000002549_LAP3	-0.279056	0.000810497	0.0453524	VI
ENSG00000180855_ZNF443	-0.278401	0.000606124	0.0394344	VI
ENSG00000241343_RPL36A	-0.275668	6.18997e-05	0.0184366	VI
ENSG00000205643_CDPF1	-0.272416	0.000954419	0.0485819	VI
ENSG00000233927_RPS28	-0.269347	0.000163933	0.0233244	VI
ENSG00000126790_L3HYPDH	-0.26747	0.000424838	0.0345516	VI
ENSG00000059378_PARP12	-0.26552	0.000775638	0.0445597	VI
ENSG00000099785_MARCH2	-0.265287	0.000409853	0.0337276	VI
ENSG00000106355_LSM5	-0.260772	0.000444279	0.0347347	VI
ENSG00000177600_RPLP2	-0.259099	9.34103e-05	0.0190794	VI
ENSG00000175938_ORAI3	-0.258977	0.000911059	0.0473378	VI
ENSG00000148834_GSTO1	-0.258567	0.000909665	0.0473378	VI
ENSG00000145592_RPL37	-0.258331	1.06236e-05	0.00735152	VI
ENSG00000117054_ACADM	-0.249785	0.000307724	0.0299921	VI
ENSG00000137038_DMAC1	-0.245872	0.000307667	0.0299921	VI
ENSG00000166130_IKBIP	-0.244997	0.000249802	0.0276212	VI
ENSG00000188690_UROS	-0.243042	0.000832981	0.0454206	VI
ENSG00000071082_RPL31	-0.241782	7.09549e-05	0.0185629	VI
ENSG00000196466_ZNF799	-0.241141	0.000933458	0.04801	VI
ENSG00000187535_IFT140	-0.238767	1.98495e-05	0.0107951	VI
ENSG00000198242_RPL23A	-0.236298	0.000312806	0.0299921	VI
ENSG00000256028_AC026362.1	-0.231846	0.000785295	0.0447474	VI
ENSG00000139291_TMEM19	-0.230684	0.000297808	0.0299921	VI
ENSG00000144713_RPL32	-0.230138	0.000139531	0.0219127	VI
ENSG00000149932_TMEM219	-0.229453	8.06743e-05	0.0185629	VI
ENSG00000075239_ACAT1	-0.229104	0.000525349	0.0368066	VI
ENSG00000124614_RPS10	-0.219849	0.000641789	0.0403744	VI
ENSG00000112306_RPS12	-0.219722	0.000347036	0.0313076	VI
ENSG00000158042_MRPL17	-0.215008	0.00021059	0.0252442	VI
ENSG00000173436_MINOS1	-0.204983	0.000117148	0.0208234	VI
ENSG00000182093_WRB	-0.20213	0.000306936	0.0299921	VI
ENSG00000173915_ATP5MD	-0.200652	0.000315363	0.0300067	VI
ENSG00000109475_RPL34	-0.19986	0.000927115	0.0478454	VI
ENSG00000143947_RPS27A	-0.186085	0.000271253	0.0290072	VI
ENSG00000151498_ACAD8	-0.18539	0.000300909	0.0299921	VI
ENSG00000228474_OST4	-0.179788	0.00075124	0.0438195	VI
ENSG00000078668_VDAC3	-0.174242	0.000157325	0.0230299	VI
ENSG00000174021_GNG5	-0.159908	0.000756577	0.0439623	VI
ENSG00000147471_PLPBP	-0.154049	0.000329135	0.0305534	VI
ENSG00000174748_RPL15	-0.131388	0.000619063	0.0395764	VI
ENSG00000214114_MYCBP	-0.131234	0.000580705	0.0384333	VI
ENSG00000134717_BTF3L4	-0.123227	0.000209037	0.0252442	VI
ENSG00000073584_SMARCE1	0.08981	0.00071571	0.0425624	VI
ENSG00000198231_DDX42	0.0898456	0.000250376	0.0276212	VI
ENSG00000089022_MAPKAPK5	0.109361	0.000433483	0.0345516	VI
ENSG00000163348_PYGO2	0.109711	0.000616899	0.0395764	VI
ENSG00000197111_PCBP2	0.115172	0.000514578	0.0363084	VI
ENSG00000198218_QRICH1	0.121798	4.20302e-07	0.00213289	VI
ENSG00000156983_BRPF1	0.123215	0.000429667	0.0345516	VI
ENSG00000110075_PPP6R3	0.123999	9.69951e-05	0.0191427	VI
ENSG00000143569_UBAP2L	0.124379	0.000241489	0.027436	VI
ENSG00000187555_USP7	0.126655	1.01445e-05	0.00735152	VI
ENSG00000121067_SPOP	0.127898	0.000195311	0.0245469	VI
ENSG00000044115_CTNNA1	0.129673	3.35826e-05	0.0129488	VI
ENSG00000109133_TMEM33	0.131203	0.000515148	0.0363084	VI
ENSG00000164924_YWHAZ	0.131646	0.000307573	0.0299921	VI
ENSG00000096401_CDC5L	0.131945	0.00100328	0.049752	VI
ENSG00000109111_SUPT6H	0.136493	0.000488727	0.0362946	VI
ENSG00000114030_KPNA1	0.138333	0.000443617	0.0347347	VI
ENSG00000214753_HNRNPUL2	0.139222	0.000451234	0.0349845	VI
ENSG00000145216_FIP1L1	0.140161	9.94343e-05	0.0191427	VI
ENSG00000120948_TARDBP	0.140863	2.30132e-06	0.00382629	VI
ENSG00000161533_ACOX1	0.141989	0.000355768	0.0313076	VI
ENSG00000013561_RNF14	0.142832	0.000141242	0.0219127	VI
ENSG00000182831_C16orf72	0.142965	0.000620387	0.0395764	VI
ENSG00000168710_AHCYL1	0.143742	0.000713269	0.0425624	VI
ENSG00000125875_TBC1D20	0.148011	0.000763056	0.0441702	VI
ENSG00000182934_SRPRA	0.14808	0.000595501	0.0389095	VI
ENSG00000259956_RBM15B	0.148451	0.000635889	0.0403366	VI
ENSG00000113712_CSNK1A1	0.150988	0.00099835	0.0496695	VI
ENSG00000139197_PEX5	0.15236	0.000116211	0.0208234	VI
ENSG00000108829_LRRC59	0.152576	0.000816872	0.0453871	VI
ENSG00000084463_WBP11	0.153314	6.41842e-05	0.0184366	VI
ENSG00000156304_SCAF4	0.15374	2.34009e-05	0.0107956	VI
ENSG00000156256_USP16	0.155023	0.000901694	0.0473358	VI
ENSG00000178691_SUZ12	0.157353	0.000230747	0.0270222	VI
ENSG00000120685_PROSER1	0.158272	0.00030535	0.0299921	VI
ENSG00000165861_ZFYVE1	0.159502	0.000960648	0.0485819	VI
ENSG00000029364_SLC39A9	0.159525	0.000823885	0.0454206	VI
ENSG00000168724_DNAJC21	0.160273	0.000700669	0.041996	VI
ENSG00000143614_GATAD2B	0.162836	0.000121555	0.0212707	VI
ENSG00000077147_TM9SF3	0.163625	0.00034927	0.0313076	VI
ENSG00000140577_CRTC3	0.167541	0.000432578	0.0345516	VI
ENSG00000099995_SF3A1	0.167971	1.00903e-05	0.00735152	VI
ENSG00000101189_MRGBP	0.168588	0.000792725	0.0448604	VI
ENSG00000095139_ARCN1	0.169728	0.000670903	0.0411848	VI
ENSG00000133104_SPART	0.170977	0.000323775	0.0302402	VI
ENSG00000102974_CTCF	0.171347	0.000115477	0.0208234	VI
ENSG00000107862_GBF1	0.176074	9.49889e-05	0.0190794	VI
ENSG00000109079_TNFAIP1	0.176721	0.000193385	0.0245469	VI
ENSG00000188021_UBQLN2	0.178512	6.59093e-05	0.0185629	VI
ENSG00000168092_PAFAH1B2	0.179033	0.000136877	0.0219127	VI
ENSG00000272886_DCP1A	0.179836	0.000549585	0.0377683	VI
ENSG00000155506_LARP1	0.180418	0.000141828	0.0219127	VI
ENSG00000181220_ZNF746	0.181705	0.000880171	0.0465268	VI
ENSG00000197217_ENTPD4	0.182881	0.000239509	0.0274156	VI
ENSG00000091009_RBM27	0.189076	0.000499202	0.0363084	VI
ENSG00000235437_LINC01278	0.189735	0.00082973	0.0454206	VI
ENSG00000145860_RNF145	0.194968	0.000125916	0.0215216	VI
ENSG00000198586_TLK1	0.200463	0.000649006	0.0405687	VI
ENSG00000197872_FAM49A	0.201316	8.42977e-05	0.0185629	VI
ENSG00000127483_HP1BP3	0.203391	0.000573844	0.0383167	VI
ENSG00000204842_ATXN2	0.205138	0.000152555	0.0225485	VI
ENSG00000166900_STX3	0.207892	0.000531887	0.0368066	VI
ENSG00000129315_CCNT1	0.208509	0.000945742	0.0484781	VI
ENSG00000014164_ZC3H3	0.20898	0.000504392	0.0363084	VI
ENSG00000107771_CCSER2	0.209301	0.000513265	0.0363084	VI
ENSG00000188785_ZNF548	0.210314	0.000727427	0.0429238	VI
ENSG00000198380_GFPT1	0.21203	0.000511442	0.0363084	VI
ENSG00000137815_RTF1	0.213599	9.01174e-05	0.0187938	VI
ENSG00000119537_KDSR	0.215652	1.68668e-06	0.00366829	VI
ENSG00000143376_SNX27	0.219694	3.75361e-06	0.00439576	VI
ENSG00000111321_LTBR	0.222607	0.00034153	0.0313076	VI
ENSG00000151929_BAG3	0.224993	8.21752e-05	0.0185629	VI
ENSG00000075568_TMEM131	0.22749	0.0003664	0.0318747	VI
ENSG00000144909_OSBPL11	0.230223	0.000583491	0.0384333	VI
ENSG00000102580_DNAJC3	0.235606	0.000853295	0.0457336	VI
ENSG00000177425_PAWR	0.239207	0.000691647	0.041894	VI
ENSG00000158417_EIF5B	0.241555	0.000196711	0.0245469	VI
ENSG00000155096_AZIN1	0.245644	0.000137741	0.0219127	VI
ENSG00000213639_PPP1CB	0.247171	5.32114e-06	0.00516469	VI
ENSG00000178104_PDE4DIP	0.250507	0.000190614	0.0245469	VI
ENSG00000152223_EPG5	0.252461	6.36883e-05	0.0184366	VI
ENSG00000241839_PLEKHO2	0.255284	0.000343226	0.0313076	VI
ENSG00000090020_SLC9A1	0.25566	0.000798553	0.0448604	VI
ENSG00000101935_AMMECR1	0.255763	0.00048157	0.0361154	VI
ENSG00000167986_DDB1	0.262112	0.00085134	0.0457336	VI
ENSG00000086062_B4GALT1	0.263917	0.000142496	0.0219127	VI
ENSG00000137710_RDX	0.265437	0.00019407	0.0245469	VI
ENSG00000162407_PLPP3	0.265604	0.000313238	0.0299921	VI
ENSG00000108256_NUFIP2	0.265966	0.000170911	0.023654	VI
ENSG00000117139_KDM5B	0.268961	4.10777e-05	0.0145434	VI
ENSG00000069849_ATP1B3	0.271058	0.000134854	0.0219127	VI
ENSG00000152061_RABGAP1L	0.273328	0.000650208	0.0405687	VI
ENSG00000114737_CISH	0.273373	0.000444908	0.0347347	VI
ENSG00000173848_NET1	0.275081	8.08444e-05	0.0185629	VI
ENSG00000108219_TSPAN14	0.27655	1.0508e-05	0.00735152	VI
ENSG00000253729_PRKDC	0.27662	0.000621306	0.0395764	VI
ENSG00000170871_KIAA0232	0.279739	0.000206841	0.0252125	VI
ENSG00000108510_MED13	0.283217	0.000566429	0.0381562	VI
ENSG00000196352_CD55	0.284529	0.000571954	0.0383167	VI
ENSG00000134504_KCTD1	0.28769	0.00032148	0.0302112	VI
ENSG00000100592_DAAM1	0.288078	0.000216725	0.025577	VI
ENSG00000081913_PHLPP1	0.291302	0.000130909	0.0219006	VI
ENSG00000198815_FOXJ3	0.293583	8.47501e-05	0.0185629	VI
ENSG00000197081_IGF2R	0.294232	0.000962751	0.0485819	VI
ENSG00000139517_LNX2	0.297569	0.000182863	0.0244202	VI
ENSG00000126821_SGPP1	0.299468	0.000249557	0.0276212	VI
ENSG00000141458_NPC1	0.300877	1.14127e-06	0.00309424	VI
ENSG00000182158_CREB3L2	0.303199	0.000312397	0.0299921	VI
ENSG00000167470_MIDN	0.307252	0.000639259	0.0403744	VI
ENSG00000153046_CDYL	0.314192	4.83176e-05	0.0160206	VI
ENSG00000077274_CAPN6	0.314756	0.000289549	0.0299921	VI
ENSG00000271303_SRXN1	0.316869	0.000907497	0.0473378	VI
ENSG00000144036_EXOC6B	0.322175	7.09892e-05	0.0185629	VI
ENSG00000154001_PPP2R5E	0.323559	0.000150796	0.0225485	VI
ENSG00000146648_EGFR	0.325028	0.000888116	0.0467844	VI
ENSG00000140386_SCAPER	0.325368	0.0003957	0.0336133	VI
ENSG00000153317_ASAP1	0.326336	0.000620371	0.0395764	VI
ENSG00000189337_KAZN	0.328086	0.000979518	0.0488924	VI
ENSG00000180867_PDIA3P1	0.331592	0.000168072	0.0234851	VI
ENSG00000092068_SLC7A8	0.332973	0.000558539	0.037792	VI
ENSG00000076356_PLXNA2	0.339536	3.57794e-06	0.00439576	VI
ENSG00000178726_THBD	0.339724	0.000553228	0.0377683	VI
ENSG00000073711_PPP2R3A	0.351172	0.00035541	0.0313076	VI
ENSG00000171791_BCL2	0.351338	0.0004269	0.0345516	VI
ENSG00000120217_CD274	0.352708	0.000376099	0.0321735	VI
ENSG00000162777_DENND2D	0.354199	0.000354655	0.0313076	VI
ENSG00000069702_TGFBR3	0.360532	0.000173332	0.023773	VI
ENSG00000140332_TLE3	0.360956	1.9577e-05	0.0107951	VI
ENSG00000111371_SLC38A1	0.364608	2.76466e-06	0.00382629	VI
ENSG00000162852_CNST	0.374096	0.000214843	0.0255529	VI
ENSG00000059728_MXD1	0.376017	0.000498716	0.0363084	VI
ENSG00000165895_ARHGAP42	0.39318	6.07973e-05	0.0184366	VI
ENSG00000198431_TXNRD1	0.399876	0.000466496	0.0355592	VI
ENSG00000265107_GJA5	0.40386	0.000161569	0.0232676	VI
ENSG00000176092_CRYBG2	0.414221	0.000965031	0.0485819	VI
ENSG00000283149_AC068631.2	0.415242	0.000857802	0.0457336	VI
ENSG00000234797_RPS3AP6	0.422346	0.000207012	0.0252125	VI
ENSG00000139116_KIF21A	0.425243	0.000835377	0.0454206	VI
ENSG00000131873_CHSY1	0.427309	5.05115e-05	0.0160206	VI
ENSG00000198142_SOWAHC	0.435052	0.000269367	0.0290072	VI
ENSG00000179348_GATA2	0.435417	0.000188526	0.0245469	VI
ENSG00000112782_CLIC5	0.448568	0.000116622	0.0208234	VI
ENSG00000177707_NECTIN3	0.458724	3.29149e-05	0.0129488	VI
ENSG00000186654_PRR5	0.468249	0.000479309	0.0361154	VI
ENSG00000213853_EMP2	0.479899	7.00119e-06	0.00592145	VI
ENSG00000064195_DLX3	0.483717	0.000376174	0.0321735	VI
ENSG00000109189_USP46	0.486297	0.000138375	0.0219127	VI
ENSG00000120875_DUSP4	0.486934	0.000307446	0.0299921	VI
ENSG00000188897_AC099489.1	0.505616	2.26907e-05	0.0107951	VI
ENSG00000244313_AC024293.1	0.516297	0.000832314	0.0454206	VI
ENSG00000198929_NOS1AP	0.51982	8.44375e-05	0.0185629	VI
ENSG00000229644_NAMPTP1	0.532761	0.000696216	0.041894	VI
ENSG00000279662_AC131649.2	0.545292	0.000269521	0.0290072	VI
ENSG00000283041_AC008038.1	0.576205	2.16626e-05	0.0107951	VI
ENSG00000227733_AC239809.3	0.598495	0.000319616	0.0302112	VI
ENSG00000166676_TVP23A	0.607524	0.000841762	0.0454432	VI
ENSG00000144868_TMEM108	0.614826	2.08924e-05	0.0107951	VI
ENSG00000122121_XPNPEP2	0.652599	0.000193089	0.0245469	VI
ENSG00000215492_HNRNPA1P7	0.674432	4.46411e-05	0.0154458	VI
ENSG00000218426_AL590867.2	0.676272	0.000832071	0.0454206	VI
ENSG00000228253_MT-ATP8	0.684127	3.61263e-05	0.0130949	VI
ENSG00000163464_CXCR1	0.797018	0.00012723	0.0215216	VI
ENSG00000162551_ALPL	0.79944	0.000444629	0.0347347	VI
ENSG00000180871_CXCR2	0.805945	2.16538e-05	0.0107951	VI
ENSG00000180509_KCNE1	0.837345	0.000124826	0.0215216	VI
ENSG00000156384_SFR1	-0.500713	1.59445e-05	0.039982	VM
ENSG00000213853_EMP2	0.480913	1.47959e-06	0.00757402	VM
ENSG00000267934_AC010300.1	0.539803	1.30902e-05	0.039982	VM
ENSG00000227733_AC239809.3	0.716116	1.82245e-05	0.039982	VM
ENSG00000108785_HSD17B1P1	0.722469	8.20808e-06	0.0315129	VM
ENSG00000279662_AC131649.2	0.742086	1.7873e-07	0.00137238	VM
ENSG00000180509_KCNE1	1.04345	5.43234e-08	0.000834244	VM
ENSG00000271394_RF00100	1.1392	2.52568e-05	0.0484835	VM

## Sheet: c
supplementary file 1c. The GO enrichment terms of the differentially expressed genes in the placenta.
VF layer of gender combined placenta
ID	Description	GeneRatio	BgRatio	pvalue	p.adjust	qvalue	geneID	Count	type
GO:1903311	regulation of mRNA metabolic process	8/64	344/18866	2.05e-05	0.0330544	0.0276757	PSMD3/TARDBP/PSMD6/FAM172A/SRSF4/HNRNPL/HNRNPA0/SART3	8	up
GO:0000381	regulation of alternative mRNA splicing, via spliceosome	4/64	76/18866	0.000128643	0.0914613	0.0765783	FAM172A/SRSF4/HNRNPL/SART3	4	up
GO:0000380	alternative mRNA splicing, via spliceosome	4/64	87/18866	0.00021705	0.0914613	0.0765783	FAM172A/SRSF4/HNRNPL/SART3	4	up
GO:1903312	negative regulation of mRNA metabolic process	4/64	88/18866	0.00022681	0.0914613	0.0765783	TARDBP/SRSF4/HNRNPL/HNRNPA0	4	up
GO:0016579	protein deubiquitination	6/64	283/18866	0.000390606	0.114141	0.0955673	PSMD3/PSMD6/USP46/VCP/USP7/SART3	6	up
GO:0051607	defense response to virus	8/76	258/18866	9.27e-06	0.00912125	0.00815391	OAS1/IFIT1/IFIT2/ISG15/DDX58/TRIM22/IFNLR1/CXCL10	8	down
GO:0009615	response to virus	9/76	349/18866	1.1e-05	0.00912125	0.00815391	OAS1/IFIT1/IFIT2/ISG15/DDX58/IFNGR2/TRIM22/IFNLR1/CXCL10	9	down
GO:0060333	interferon-gamma-mediated signaling pathway	5/76	91/18866	3.3e-05	0.0135042	0.012072	OAS1/HLA-DRB1/IFNGR2/TRIM22/B2M	5	down
GO:0060337	type I interferon signaling pathway	5/76	95/18866	4.06e-05	0.0135042	0.012072	OAS1/USP18/IFIT1/IFIT2/ISG15	5	down
GO:0071357	cellular response to type I interferon	5/76	95/18866	4.06e-05	0.0135042	0.012072	OAS1/USP18/IFIT1/IFIT2/ISG15	5	down
VI layer of gender combined placenta
ID	Description	GeneRatio	BgRatio	pvalue	p.adjust	qvalue	geneID	Count	type
GO:0016570	histone modification	12/142	468/18866	0.000222983	0.120699	0.109651	PYGO2/DDB1/SUPT6H/MRGBP/GATA2/CTCF/KDM5B/RTF1/USP16/USP7/SUZ12/BRPF1	12	up
GO:0007623	circadian rhythm	8/142	218/18866	0.000249179	0.120699	0.109651	DDB1/TARDBP/PRKDC/PHLPP1/USP7/GFPT1/EGFR/PPP1CB	8	up
GO:0090150	establishment of protein localization to membrane	10/142	342/18866	0.000269406	0.120699	0.109651	YWHAZ/SRPRA/PEX5/NPC1/BCL2/KCNE1/NECTIN3/STX3/EGFR/CNST	10	up
GO:0016569	covalent chromatin modification	12/142	481/18866	0.000286207	0.120699	0.109651	PYGO2/DDB1/SUPT6H/MRGBP/GATA2/CTCF/KDM5B/RTF1/USP16/USP7/SUZ12/BRPF1	12	up
GO:0042752	regulation of circadian rhythm	6/142	122/18866	0.000323149	0.120699	0.109651	DDB1/TARDBP/PRKDC/PHLPP1/USP7/PPP1CB	6	up
GO:0006614	SRP-dependent cotranslational protein targeting to membrane	15/112	105/18866	5.44e-17	9.18e-14	7.88e-14	RPL34/RPL31/RPL36/RPL15/RPL39/RPL23A/RPS12/RPLP2/RPS27/RPL37/RPL36A/RPS10/RPS27A/RPS28/RPL32	15	down
GO:0006613	cotranslational protein targeting to membrane	15/112	109/18866	9.74e-17	9.18e-14	7.88e-14	RPL34/RPL31/RPL36/RPL15/RPL39/RPL23A/RPS12/RPLP2/RPS27/RPL37/RPL36A/RPS10/RPS27A/RPS28/RPL32	15	down
GO:0000184	nuclear-transcribed mRNA catabolic process, nonsense-mediated decay	15/112	120/18866	4.3e-16	2.03e-13	1.74e-13	RPL34/RPL31/RPL36/RPL15/RPL39/RPL23A/RPS12/RPLP2/RPS27/RPL37/RPL36A/RPS10/RPS27A/RPS28/RPL32	15	down
GO:0045047	protein targeting to ER	15/112	120/18866	4.3e-16	2.03e-13	1.74e-13	RPL34/RPL31/RPL36/RPL15/RPL39/RPL23A/RPS12/RPLP2/RPS27/RPL37/RPL36A/RPS10/RPS27A/RPS28/RPL32	15	down
GO:0072599	establishment of protein localization to endoplasmic reticulum	15/112	124/18866	7.11e-16	2.68e-13	2.3e-13	RPL34/RPL31/RPL36/RPL15/RPL39/RPL23A/RPS12/RPLP2/RPS27/RPL37/RPL36A/RPS10/RPS27A/RPS28/RPL32	15	down
UC layer of male-infants placenta
ID	Description	GeneRatio	BgRatio	pvalue	p.adjust	qvalue	geneID	Count	type
GO:0002183	cytoplasmic translational initiation	5/121	35/18866	2.78e-06	0.00622595	0.00596556	EIF4A2/EIF2S3/NCK1/EIF3E/EIF4B	5	up
GO:0051090	regulation of DNA-binding transcription factor activity	12/121	455/18866	3.65e-05	0.0408365	0.0391286	TAX1BP1/ATF2/NPM1/SAV1/SP100/EGLN1/PELI1/MID2/RIPK2/IL1RAP/KIT/NFKBIA	12	up
GO:0042129	regulation of T cell proliferation	7/121	167/18866	0.00010173	0.0704538	0.0675072	PRKAR1A/NCK1/PELI1/IL6ST/RIPK2/CD209/ARG2	7	up
GO:0006446	regulation of translational initiation	5/121	79/18866	0.000154108	0.0704538	0.0675072	EIF4A2/NPM1/NCK1/EIF3E/EIF4B	5	up
GO:0070663	regulation of leukocyte proliferation	8/121	240/18866	0.000159688	0.0704538	0.0675072	PRKAR1A/NCK1/PELI1/IL6ST/RIPK2/CD209/IL34/ARG2	8	up
GO:0048488	synaptic vesicle endocytosis	6/176	62/18866	2.41e-05	0.0240857	0.0239435	PIP5K1C/SCRIB/ACTB/DGKQ/GAK/CEL	6	down
GO:0140238	presynaptic endocytosis	6/176	62/18866	2.41e-05	0.0240857	0.0239435	PIP5K1C/SCRIB/ACTB/DGKQ/GAK/CEL	6	down
GO:0036465	synaptic vesicle recycling	6/176	74/18866	6.63e-05	0.0441187	0.0438581	PIP5K1C/SCRIB/ACTB/DGKQ/GAK/CEL	6	down
GO:0009451	RNA modification	7/176	168/18866	0.00102356	0.397059	0.394714	NSUN5P1/PUS1/TRMU/NSUN5P2/TRMT1/QTRT1/TRMT61A	7	down
GO:0008033	tRNA processing	6/176	130/18866	0.00139005	0.397059	0.394714	PUS1/TRMU/TRMT1/QTRT1/PTCD1/TRMT61A	6	down
AN layer of male-infants placenta
ID	Description	GeneRatio	BgRatio	pvalue	p.adjust	qvalue	geneID	Count	type
GO:0018108	peptidyl-tyrosine phosphorylation	8/76	374/18866	0.00012889	0.086466	0.0758125	EFNA1/VEGFA/CLK1/GGNBP2/TESK2/MAP2K7/DVL2/CLK4	8	up
GO:0018212	peptidyl-tyrosine modification	8/76	377/18866	0.000136161	0.086466	0.0758125	EFNA1/VEGFA/CLK1/GGNBP2/TESK2/MAP2K7/DVL2/CLK4	8	up
GO:0031647	regulation of protein stability	7/76	296/18866	0.000188974	0.086466	0.0758125	EFNA1/USP36/HPS4/NR1D1/VPS11/USP27X/SIAH1	7	up
GO:1900745	positive regulation of p38MAPK cascade	3/76	31/18866	0.000260371	0.086466	0.0758125	VEGFA/GADD45G/GADD45A	3	up
GO:1903955	positive regulation of protein targeting to mitochondrion	3/76	32/18866	0.000286476	0.086466	0.0758125	USP36/HPS4/VPS11	3	up
GO:0006644	phospholipid metabolic process	10/67	455/18866	4.37e-06	0.00712674	0.00629357	DPAGT1/AGPAT1/PGP/DGKD/SMPD1/PIP5K1C/GDE1/GPAA1/DOLPP1/ABHD6	10	down
GO:0006066	alcohol metabolic process	9/67	385/18866	8.41e-06	0.00712674	0.00629357	DPAGT1/PGP/G6PD/SMPD1/GDE1/ACSS2/FASN/DHCR7/SQLE	9	down
GO:0006695	cholesterol biosynthetic process	4/67	75/18866	0.000146072	0.0380666	0.0336164	G6PD/FASN/DHCR7/SQLE	4	down
GO:1902653	secondary alcohol biosynthetic process	4/67	75/18866	0.000146072	0.0380666	0.0336164	G6PD/FASN/DHCR7/SQLE	4	down
GO:0016126	sterol biosynthetic process	4/67	81/18866	0.000196779	0.0380666	0.0336164	G6PD/FASN/DHCR7/SQLE	4	down
VF layer of male-infants placenta
ID	Description	GeneRatio	BgRatio	pvalue	p.adjust	qvalue	geneID	Count	type
GO:0010970	transport along microtubule	5/50	161/18866	6.61e-05	0.0639883	0.0581011	TMEM108/BAG3/ARL8A/PEX14/CAMSAP3	5	up
GO:0099111	microtubule-based transport	5/50	190/18866	0.000144191	0.0639883	0.0581011	TMEM108/BAG3/ARL8A/PEX14/CAMSAP3	5	up
GO:0030705	cytoskeleton-dependent intracellular transport	5/50	200/18866	0.000183173	0.0639883	0.0581011	TMEM108/BAG3/ARL8A/PEX14/CAMSAP3	5	up
GO:0007018	microtubule-based movement	6/50	368/18866	0.000407287	0.106709	0.0968915	TMEM108/BAG3/ARL8A/PEX14/CAMSAP3/KLC2	6	up
GO:0007565	female pregnancy	4/50	196/18866	0.00179122	0.321599	0.292011	PSG1/ENDOU/EMP2/TPPP3	4	up
GO:0035457	cellular response to interferon-alpha	3/109	11/18866	2.99e-05	0.0559494	0.052806	IFIT2/AXL/IFNAR1	3	down
GO:0001838	embryonic epithelial tube formation	6/109	125/18866	8.7e-05	0.0559494	0.052806	CELSR1/KIF20B/SOX4/NOG/GDNF/TRIM71	6	down
GO:0030198	extracellular matrix organization	10/109	395/18866	9.76e-05	0.0559494	0.052806	SERAC1/HSPG2/RB1/ITGAL/CAV2/ADAMTS5/PRDX4/MMP19/ITGB1/DPT	10	down
GO:0043062	extracellular structure organization	10/109	396/18866	9.97e-05	0.0559494	0.052806	SERAC1/HSPG2/RB1/ITGAL/CAV2/ADAMTS5/PRDX4/MMP19/ITGB1/DPT	10	down
GO:0072175	epithelial tube formation	6/109	133/18866	0.000122535	0.0559494	0.052806	CELSR1/KIF20B/SOX4/NOG/GDNF/TRIM71	6	down

## Sheet: d
supplementary file 1d. The identified DEGs in the seven layers of the male-infant placentas between Tibetans and Han migrants.
Genes	log2FoldChange	p-value	adjusted-p	Layers
ENSG00000228748_AL450306.1	-1.30791	0.000198908	0.0198565	UC
ENSG00000196436_NPIPB15	-1.23602	4.24706e-05	0.0104784	UC
ENSG00000277701_AC159540.2	-1.22113	0.000616784	0.0323866	UC
ENSG00000272789_AC010976.2	-1.17828	3.84776e-05	0.0101021	UC
ENSG00000263020_AL662899.2	-1.14011	1.15303e-05	0.00592213	UC
ENSG00000196656_AC004057.1	-0.980429	0.000342499	0.0255892	UC
ENSG00000099840_IZUMO4	-0.96347	5.16764e-06	0.00477043	UC
ENSG00000260306_AC092375.2	-0.953433	0.000821294	0.0370201	UC
ENSG00000223403_MEG9	-0.944839	4.81546e-06	0.00477043	UC
ENSG00000133246_PRAM1	-0.923968	0.00135673	0.0487058	UC
ENSG00000247982_LINC00926	-0.919423	0.00118308	0.0445622	UC
ENSG00000093100_AC016026.1	-0.904566	8.45245e-05	0.01415	UC
ENSG00000111664_GNB3	-0.902515	7.65054e-06	0.00477043	UC
ENSG00000280064_AC130304.1	-0.898921	6.86981e-05	0.0126646	UC
ENSG00000270804_AC010326.4	-0.888042	0.000443176	0.0284641	UC
ENSG00000250067_YJEFN3	-0.878236	0.000110782	0.0146712	UC
ENSG00000272638_AC006027.1	-0.877663	0.0011697	0.0444278	UC
ENSG00000128709_HOXD9	-0.848115	0.000360381	0.0259284	UC
ENSG00000260257_AL035071.1	-0.843923	0.000196589	0.0198565	UC
ENSG00000169246_NPIPB3	-0.805001	0.0005957	0.032354	UC
ENSG00000262877_AC110285.2	-0.803698	0.000121427	0.015143	UC
ENSG00000213658_LAT	-0.802608	3.96335e-05	0.0102261	UC
ENSG00000261067_AC109460.3	-0.796417	0.000252528	0.0222298	UC
ENSG00000223749_MIR503HG	-0.788983	4.42629e-05	0.0106838	UC
ENSG00000250575_AL732372.3	-0.7886	0.000549442	0.0317467	UC
ENSG00000279821_AC145098.2	-0.788588	0.000471842	0.0289824	UC
ENSG00000102904_TSNAXIP1	-0.781203	2.06321e-05	0.0072303	UC
ENSG00000274272_AC069281.2	-0.773224	0.000104955	0.01415	UC
ENSG00000267281_AC023509.3	-0.761673	0.000725529	0.0350221	UC
ENSG00000265206_AC004687.1	-0.753534	0.000794059	0.0364727	UC
ENSG00000106133_NSUN5P2	-0.733228	8.9991e-05	0.01415	UC
ENSG00000231346_LINC01160	-0.725518	0.000267432	0.0231737	UC
ENSG00000135502_SLC26A10	-0.716812	0.000792593	0.0364727	UC
ENSG00000004660_CAMKK1	-0.713892	0.00041723	0.0273853	UC
ENSG00000273154_AL121845.3	-0.71301	0.000227436	0.0211402	UC
ENSG00000170835_CEL	-0.710373	0.000649793	0.0326314	UC
ENSG00000251615_AC104825.1	-0.702889	7.51544e-06	0.00477043	UC
ENSG00000261490_AC005674.2	-0.6999	4.09711e-06	0.00437952	UC
ENSG00000186567_CEACAM19	-0.699723	8.92465e-05	0.01415	UC
ENSG00000243970_PPIEL	-0.695333	0.000416032	0.0273853	UC
ENSG00000282034_AC106886.5	-0.692312	1.06599e-06	0.00259379	UC
ENSG00000182685_BRICD5	-0.685694	0.000649677	0.0326314	UC
ENSG00000240053_LY6G5B	-0.685605	0.000235166	0.0214589	UC
ENSG00000102878_HSF4	-0.683647	2.04785e-05	0.0072303	UC
ENSG00000264772_AC016876.2	-0.682911	0.000219192	0.0210573	UC
ENSG00000279689_AC022400.9	-0.677991	4.63797e-05	0.0107857	UC
ENSG00000185339_TCN2	-0.664472	0.00105496	0.0422569	UC
ENSG00000108405_P2RX1	-0.664397	6.51381e-05	0.0126646	UC
ENSG00000158106_RHPN1	-0.65131	7.87253e-05	0.0136922	UC
ENSG00000167549_CORO6	-0.641971	0.000466114	0.0289436	UC
ENSG00000276529_AP001505.1	-0.638244	1.50061e-05	0.00631848	UC
ENSG00000241404_EGFL8	-0.637853	0.000175952	0.0192199	UC
ENSG00000141519_CCDC40	-0.627576	0.000637635	0.0326314	UC
ENSG00000187942_LDLRAD2	-0.613567	0.000381894	0.0268312	UC
ENSG00000160072_ATAD3B	-0.612369	1.82866e-06	0.00334617	UC
ENSG00000149451_ADAM33	-0.604481	0.00110882	0.0427452	UC
ENSG00000232533_AC093673.1	-0.60374	0.000241696	0.0217701	UC
ENSG00000076344_RGS11	-0.59901	0.00091176	0.0395492	UC
ENSG00000172346_CSDC2	-0.598272	0.00140852	0.0493017	UC
ENSG00000168071_CCDC88B	-0.592825	0.0001818	0.0194331	UC
ENSG00000111665_CDCA3	-0.591916	0.00123211	0.0457259	UC
ENSG00000167393_PPP2R3B	-0.590285	0.000616288	0.0323866	UC
ENSG00000188599_NPIPP1	-0.588959	0.000578677	0.0321929	UC
ENSG00000129467_ADCY4	-0.588349	0.000591958	0.032354	UC
ENSG00000213398_LCAT	-0.579407	0.000797606	0.0364727	UC
ENSG00000102287_GABRE	-0.576891	0.00138685	0.0492976	UC
ENSG00000174576_NPAS4	-0.570113	0.00111112	0.0427452	UC
ENSG00000245149_RNF139-AS1	-0.568996	0.000599659	0.032354	UC
ENSG00000107738_VSIR	-0.565329	0.000724882	0.0350221	UC
ENSG00000269044_AC024075.2	-0.540594	0.000267895	0.0231737	UC
ENSG00000284976_BX255925.3	-0.53714	0.000565035	0.0320108	UC
ENSG00000170421_KRT8	-0.533294	0.000624118	0.0324303	UC
ENSG00000173442_EHBP1L1	-0.531591	6.49098e-06	0.00477043	UC
ENSG00000183963_SMTN	-0.526864	0.000356152	0.0259284	UC
ENSG00000006025_OSBPL7	-0.511591	0.000612237	0.032375	UC
ENSG00000279095_AC243964.3	-0.511522	1.46789e-05	0.00631848	UC
ENSG00000228327_AL669831.1	-0.50479	0.000944258	0.0401444	UC
ENSG00000247903_AC024896.1	-0.503611	0.000764966	0.0358863	UC
ENSG00000223959_AFG3L1P	-0.502947	4.2712e-05	0.0104784	UC
ENSG00000268858_AL118506.1	-0.502304	0.000692375	0.0338608	UC
ENSG00000181404_WASHC1	-0.490613	0.000950621	0.0403004	UC
ENSG00000223705_NSUN5P1	-0.49004	0.000923464	0.0397752	UC
ENSG00000140400_MAN2C1	-0.489048	0.000116592	0.0147476	UC
ENSG00000100429_HDAC10	-0.481866	0.000348515	0.0255892	UC
ENSG00000100416_TRMU	-0.476474	6.35405e-05	0.0126646	UC
ENSG00000204348_DXO	-0.475008	7.71658e-05	0.0136922	UC
ENSG00000250510_GPR162	-0.471032	0.000974645	0.0408272	UC
ENSG00000213983_AP1G2	-0.471027	0.000857985	0.0384424	UC
ENSG00000159840_ZYX	-0.464108	3.638e-05	0.0101021	UC
ENSG00000284691_AC073111.5	-0.460958	0.00139844	0.0493017	UC
ENSG00000179922_ZNF784	-0.453417	0.000415255	0.0273853	UC
ENSG00000196123_KIAA0895L	-0.452707	0.000301109	0.0238418	UC
ENSG00000168096_ANKS3	-0.445114	0.000280722	0.0233689	UC
ENSG00000127054_INTS11	-0.444988	0.000815967	0.0370029	UC
ENSG00000162878_PKDCC	-0.444879	1.27311e-05	0.00595376	UC
ENSG00000275764_AC092747.4	-0.442701	0.000306716	0.0240315	UC
ENSG00000160613_PCSK7	-0.442544	0.000173058	0.0190427	UC
ENSG00000197948_FCHSD1	-0.437159	0.000158584	0.0182554	UC
ENSG00000255455_AP003486.1	-0.437028	0.00118392	0.0445622	UC
ENSG00000106246_PTCD1	-0.436561	0.000117271	0.0147476	UC
ENSG00000188315_C3orf62	-0.430126	0.000223756	0.0210598	UC
ENSG00000261888_AC144831.1	-0.428571	0.00063454	0.0326314	UC
ENSG00000146826_C7orf43	-0.427565	0.000116282	0.0147476	UC
ENSG00000256087_ZNF432	-0.42733	1.55394e-05	0.00631848	UC
ENSG00000171163_ZNF692	-0.426798	0.000397005	0.0268832	UC
ENSG00000185684_EP400P1	-0.425442	0.00126387	0.0464714	UC
ENSG00000269343_ZNF587B	-0.424886	0.000162541	0.0185681	UC
ENSG00000142327_RNPEPL1	-0.423598	0.000238419	0.0216239	UC
ENSG00000177225_GATD1	-0.422178	0.000591129	0.032354	UC
ENSG00000185324_CDK10	-0.420953	6.08683e-05	0.0125823	UC
ENSG00000158552_ZFAND2B	-0.418044	0.000303017	0.0238666	UC
ENSG00000173992_CCS	-0.414988	9.57409e-05	0.01415	UC
ENSG00000174996_KLC2	-0.411712	8.75495e-06	0.00503915	UC
ENSG00000125846_ZNF133	-0.407222	2.82299e-05	0.0089127	UC
ENSG00000073169_SELENOO	-0.406441	0.00110174	0.0427452	UC
ENSG00000166166_TRMT61A	-0.40492	0.000193059	0.0197886	UC
ENSG00000213339_QTRT1	-0.404131	0.00074929	0.0354846	UC
ENSG00000205356_TECPR1	-0.402475	5.98413e-06	0.00477043	UC
ENSG00000159423_ALDH4A1	-0.402343	0.000869988	0.0385754	UC
ENSG00000167967_E4F1	-0.400698	3.77793e-05	0.0101021	UC
ENSG00000104852_SNRNP70	-0.400102	0.0010603	0.0422569	UC
ENSG00000165792_METTL17	-0.395841	0.000290223	0.0236043	UC
ENSG00000005884_ITGA3	-0.393313	0.00140186	0.0493017	UC
ENSG00000103197_TSC2	-0.387669	0.00099066	0.0409537	UC
ENSG00000148399_DPH7	-0.384009	0.000738314	0.0352999	UC
ENSG00000102901_CENPT	-0.383502	0.00106439	0.0422569	UC
ENSG00000102125_TAZ	-0.382141	0.000447857	0.0286418	UC
ENSG00000108465_CDK5RAP3	-0.37913	0.000209457	0.0206218	UC
ENSG00000100038_TOP3B	-0.378921	0.0014261	0.049314	UC
ENSG00000072778_ACADVL	-0.377878	0.000408299	0.0273636	UC
ENSG00000177192_PUS1	-0.377039	0.00109961	0.0427452	UC
ENSG00000280798_LINC00294	-0.372764	0.00078905	0.0364727	UC
ENSG00000167302_TEPSIN	-0.369175	0.00140411	0.0493017	UC
ENSG00000120318_ARAP3	-0.368834	0.000388792	0.0268832	UC
ENSG00000146830_GIGYF1	-0.368509	0.000890671	0.0390877	UC
ENSG00000169592_INO80E	-0.36571	0.000574005	0.0321722	UC
ENSG00000180900_SCRIB	-0.365509	0.000313738	0.0243269	UC
ENSG00000070404_FSTL3	-0.362739	0.00107019	0.0422569	UC
ENSG00000178950_GAK	-0.36179	4.68131e-05	0.0107857	UC
ENSG00000167114_SLC27A4	-0.359475	5.91456e-05	0.0125823	UC
ENSG00000198517_MAFK	-0.359237	0.000492688	0.0296107	UC
ENSG00000170638_TRABD	-0.35892	0.000229527	0.0212029	UC
ENSG00000094914_AAAS	-0.358792	0.000594144	0.032354	UC
ENSG00000140474_ULK3	-0.356566	0.000179323	0.0193062	UC
ENSG00000100483_VCPKMT	-0.355287	0.000687762	0.0338564	UC
ENSG00000234072_AC074117.1	-0.354309	0.00122999	0.0457259	UC
ENSG00000163516_ANKZF1	-0.354252	0.000724194	0.0350221	UC
ENSG00000087087_SRRT	-0.354011	9.66873e-05	0.01415	UC
ENSG00000103174_NAGPA	-0.351619	0.00119786	0.0449272	UC
ENSG00000197150_ABCB8	-0.35056	0.000376161	0.0266038	UC
ENSG00000186111_PIP5K1C	-0.350053	5.87392e-05	0.0125823	UC
ENSG00000077454_LRCH4	-0.349658	0.000610274	0.032375	UC
ENSG00000144589_STK11IP	-0.347652	0.00038761	0.0268832	UC
ENSG00000004534_RBM6	-0.347598	0.000212974	0.0208311	UC
ENSG00000162231_NXF1	-0.346344	0.000730663	0.0350461	UC
ENSG00000158805_ZNF276	-0.34512	0.000220915	0.0210573	UC
ENSG00000204859_ZBTB48	-0.343965	0.000887898	0.0390806	UC
ENSG00000100395_L3MBTL2	-0.343135	2.01239e-06	0.00334617	UC
ENSG00000109065_NAT9	-0.342024	0.00047255	0.0289824	UC
ENSG00000165684_SNAPC4	-0.341975	0.00117792	0.0445622	UC
ENSG00000168487_BMP1	-0.340785	5.43469e-05	0.012178	UC
ENSG00000130714_POMT1	-0.338074	0.000519912	0.0307529	UC
ENSG00000070610_GBA2	-0.335985	6.93952e-05	0.0126646	UC
ENSG00000185000_DGAT1	-0.33534	0.000563379	0.0320108	UC
ENSG00000116213_WRAP73	-0.334777	0.000973254	0.0408272	UC
ENSG00000168067_MAP4K2	-0.331887	0.000135903	0.0161043	UC
ENSG00000167173_C15orf39	-0.331021	0.000346712	0.0255892	UC
ENSG00000156858_PRR14	-0.330302	0.00029719	0.0237072	UC
ENSG00000100139_MICALL1	-0.329343	0.00141589	0.0493017	UC
ENSG00000154832_CXXC1	-0.328216	0.000296282	0.0237072	UC
ENSG00000133612_AGAP3	-0.327409	0.000938845	0.040028	UC
ENSG00000104885_DOT1L	-0.325672	0.00019189	0.0197886	UC
ENSG00000148343_MIGA2	-0.324798	0.000468427	0.028967	UC
ENSG00000172375_C2CD2L	-0.323274	0.000172309	0.0190427	UC
ENSG00000197136_PCNX3	-0.323226	5.94885e-06	0.00477043	UC
ENSG00000100359_SGSM3	-0.321521	0.000270506	0.0232651	UC
ENSG00000145214_DGKQ	-0.321168	0.000294309	0.0237072	UC
ENSG00000105287_PRKD2	-0.320842	0.00141662	0.0493017	UC
ENSG00000104731_KLHDC4	-0.319675	8.51576e-05	0.01415	UC
ENSG00000014164_ZC3H3	-0.319154	0.000457684	0.0286964	UC
ENSG00000135723_FHOD1	-0.318988	0.00132674	0.0480743	UC
ENSG00000007866_TEAD3	-0.31832	0.000596801	0.032354	UC
ENSG00000104907_TRMT1	-0.316458	0.000984994	0.0409291	UC
ENSG00000126247_CAPNS1	-0.316408	0.000799401	0.0364727	UC
ENSG00000184209_SNRNP35	-0.316019	0.00118515	0.0445622	UC
ENSG00000165138_ANKS6	-0.315889	0.00113214	0.0433313	UC
ENSG00000005073_HOXA11	-0.31546	0.000531033	0.031287	UC
ENSG00000204351_SKIV2L	-0.315343	0.000601292	0.032354	UC
ENSG00000163795_ZNF513	-0.314744	0.00104779	0.0421512	UC
ENSG00000149499_EML3	-0.313704	0.000727823	0.0350221	UC
ENSG00000196588_MKL1	-0.313283	8.70652e-05	0.01415	UC
ENSG00000182087_TMEM259	-0.312547	0.000409586	0.0273636	UC
ENSG00000204394_VARS	-0.311533	9.37676e-05	0.01415	UC
ENSG00000149716_ORAOV1	-0.309573	0.000274516	0.0232707	UC
ENSG00000100239_PPP6R2	-0.308143	6.13769e-05	0.0125823	UC
ENSG00000158773_USF1	-0.306396	0.000192514	0.0197886	UC
ENSG00000099949_LZTR1	-0.304126	0.000273087	0.0232707	UC
ENSG00000048140_TSPAN17	-0.301402	0.000137745	0.0161043	UC
ENSG00000136878_USP20	-0.300107	0.0013431	0.0485329	UC
ENSG00000075624_ACTB	-0.296422	0.000566247	0.0320108	UC
ENSG00000197586_ENTPD6	-0.293994	0.000318776	0.024464	UC
ENSG00000139722_VPS37B	-0.291827	0.000865014	0.0385266	UC
ENSG00000085733_CTTN	-0.289392	0.000136749	0.0161043	UC
ENSG00000076928_ARHGEF1	-0.288443	0.00107717	0.0424208	UC
ENSG00000158863_FAM160B2	-0.288405	0.000871265	0.0385754	UC
ENSG00000100836_PABPN1	-0.287314	8.28281e-05	0.0140855	UC
ENSG00000254986_DPP3	-0.287235	0.000365136	0.0261448	UC
ENSG00000133422_MORC2	-0.286345	0.000223622	0.0210598	UC
ENSG00000132361_CLUH	-0.286198	0.000172853	0.0190427	UC
ENSG00000160753_RUSC1	-0.28395	0.00018328	0.0194427	UC
ENSG00000115459_ELMOD3	-0.28189	0.000644478	0.0326314	UC
ENSG00000172732_MUS81	-0.280389	0.00114668	0.0436643	UC
ENSG00000139645_ANKRD52	-0.279364	0.00110741	0.0427452	UC
ENSG00000110274_CEP164	-0.274593	0.000566847	0.0320108	UC
ENSG00000159792_PSKH1	-0.271424	0.000572353	0.0321722	UC
ENSG00000237441_RGL2	-0.271158	0.000284554	0.0233694	UC
ENSG00000068120_COASY	-0.263868	0.00110694	0.0427452	UC
ENSG00000146063_TRIM41	-0.263194	0.000157164	0.0182322	UC
ENSG00000115275_MOGS	-0.262823	0.000417035	0.0273853	UC
ENSG00000146576_C7orf26	-0.262668	0.000665008	0.0330626	UC
ENSG00000240849_TMEM189	-0.26062	6.72748e-05	0.0126646	UC
ENSG00000136807_CDK9	-0.260157	0.00131774	0.0479725	UC
ENSG00000241878_PISD	-0.259657	0.000682801	0.0337232	UC
ENSG00000038358_EDC4	-0.251272	0.00128904	0.0471651	UC
ENSG00000080845_DLGAP4	-0.250945	0.000928889	0.0397752	UC
ENSG00000198952_SMG5	-0.250836	0.00135719	0.0487058	UC
ENSG00000130544_ZNF557	-0.248751	0.00145263	0.0498591	UC
ENSG00000125447_GGA3	-0.248697	0.000225326	0.021075	UC
ENSG00000119688_ABCD4	-0.243848	0.000887368	0.0390806	UC
ENSG00000103043_VAC14	-0.240073	3.82712e-05	0.0101021	UC
ENSG00000149483_TMEM138	-0.238339	0.00018656	0.0195236	UC
ENSG00000009830_POMT2	-0.237901	0.00120191	0.0449665	UC
ENSG00000085998_POMGNT1	-0.23212	7.19339e-06	0.00477043	UC
ENSG00000213699_SLC35F6	-0.231685	0.000392298	0.0268832	UC
ENSG00000089053_ANAPC5	-0.230851	0.000623463	0.0324303	UC
ENSG00000141699_RETREG3	-0.226104	0.000460217	0.0286964	UC
ENSG00000066117_SMARCD1	-0.2252	0.000244701	0.0217974	UC
ENSG00000196510_ANAPC7	-0.219413	0.00106908	0.0422569	UC
ENSG00000204231_RXRB	-0.219337	0.00144185	0.0496761	UC
ENSG00000182944_EWSR1	-0.211646	7.02883e-05	0.0126731	UC
ENSG00000204304_PBX2	-0.206033	0.000645273	0.0326314	UC
ENSG00000149480_MTA2	-0.203331	0.00108929	0.0426732	UC
ENSG00000142686_C1orf216	-0.199966	0.00030985	0.0241506	UC
ENSG00000204560_DHX16	-0.187392	0.00144398	0.0496761	UC
ENSG00000007923_DNAJC11	-0.181426	0.000506256	0.0301837	UC
ENSG00000183955_KMT5A	-0.175351	9.85285e-05	0.01415	UC
ENSG00000073584_SMARCE1	0.168973	0.00136051	0.0487083	UC
ENSG00000009307_CSDE1	0.182879	0.0012388	0.0457745	UC
ENSG00000129636_ITFG1	0.18919	0.000811137	0.0368956	UC
ENSG00000114742_WDR48	0.193889	0.000819281	0.0370201	UC
ENSG00000138768_USO1	0.205437	0.00125565	0.0462828	UC
ENSG00000156976_EIF4A2	0.208951	0.000476441	0.0290599	UC
ENSG00000154473_BUB3	0.209636	0.000976688	0.0408272	UC
ENSG00000188554_NBR1	0.214374	0.000197893	0.0198565	UC
ENSG00000143337_TOR1AIP1	0.214784	0.000901435	0.0393294	UC
ENSG00000147533_GOLGA7	0.218045	0.000113768	0.0147476	UC
ENSG00000143889_HNRNPLL	0.221712	0.000789514	0.0364727	UC
ENSG00000128915_ICE2	0.222074	0.000635008	0.0326314	UC
ENSG00000142864_SERBP1	0.222279	0.000128519	0.0156365	UC
ENSG00000069329_VPS35	0.225241	0.000590764	0.032354	UC
ENSG00000035928_RFC1	0.226407	0.000747202	0.0354846	UC
ENSG00000113851_CRBN	0.227671	0.000452623	0.0286964	UC
ENSG00000106052_TAX1BP1	0.231278	0.00111032	0.0427452	UC
ENSG00000110696_C11orf58	0.232929	0.000535254	0.0312894	UC
ENSG00000178913_TAF7	0.238915	0.00037688	0.0266038	UC
ENSG00000163933_RFT1	0.243866	0.000896554	0.0392308	UC
ENSG00000092978_GPATCH2	0.244216	0.000929549	0.0397752	UC
ENSG00000149313_AASDHPPT	0.244448	0.000101314	0.01415	UC
ENSG00000272325_NUDT3	0.245471	0.00111817	0.0429061	UC
ENSG00000198791_CNOT7	0.246478	0.000342147	0.0255892	UC
ENSG00000196504_PRPF40A	0.246534	0.00102021	0.0417144	UC
ENSG00000119844_AFTPH	0.24693	0.000605898	0.0323727	UC
ENSG00000205133_TRIQK	0.25319	0.000406996	0.0273636	UC
ENSG00000132912_DCTN4	0.254511	0.000780662	0.0364727	UC
ENSG00000103429_BFAR	0.255551	0.000104908	0.01415	UC
ENSG00000068697_LAPTM4A	0.256296	0.000546478	0.0316978	UC
ENSG00000198252_STYX	0.25943	0.00101544	0.041633	UC
ENSG00000250021_C15orf38-AP3S2	0.261554	0.00114497	0.0436643	UC
ENSG00000115966_ATF2	0.269472	0.00134589	0.0485329	UC
ENSG00000127990_SGCE	0.26987	0.000535229	0.0312894	UC
ENSG00000135823_STX6	0.270063	0.000178758	0.0193062	UC
ENSG00000164609_SLU7	0.270671	0.000184488	0.0194427	UC
ENSG00000263753_LINC00667	0.280038	0.000479639	0.0290599	UC
ENSG00000187735_TCEA1	0.282368	0.000359817	0.0259284	UC
ENSG00000185127_C6orf120	0.282517	0.000576272	0.0321787	UC
ENSG00000170540_ARL6IP1	0.287164	0.00123443	0.0457259	UC
ENSG00000084092_NOA1	0.288015	4.68473e-05	0.0107857	UC
ENSG00000130741_EIF2S3	0.288866	1.03242e-05	0.0055179	UC
ENSG00000108946_PRKAR1A	0.290149	0.000487792	0.0294347	UC
ENSG00000136758_YME1L1	0.295579	8.64028e-05	0.01415	UC
ENSG00000174106_LEMD3	0.295747	0.000793415	0.0364727	UC
ENSG00000108406_DHX40	0.302011	7.96003e-05	0.0136922	UC
ENSG00000030066_NUP160	0.304942	0.00102426	0.0417657	UC
ENSG00000168297_PXK	0.306763	0.000512658	0.0304442	UC
ENSG00000140262_TCF12	0.307927	0.00103041	0.0419026	UC
ENSG00000126858_RHOT1	0.310838	0.000282956	0.0233694	UC
ENSG00000134371_CDC73	0.322145	0.0010691	0.0422569	UC
ENSG00000166200_COPS2	0.323808	0.000564622	0.0320108	UC
ENSG00000072422_RHOBTB1	0.324063	0.00047856	0.0290599	UC
ENSG00000181163_NPM1	0.324177	0.000560701	0.0320108	UC
ENSG00000088205_DDX18	0.325629	0.000721296	0.0350221	UC
ENSG00000140382_HMG20A	0.32575	0.00045892	0.0286964	UC
ENSG00000105856_HBP1	0.33152	9.30619e-05	0.01415	UC
ENSG00000168116_KIAA1586	0.335758	0.0002474	0.0219073	UC
ENSG00000138182_KIF20B	0.341311	0.00142239	0.049314	UC
ENSG00000151748_SAV1	0.342512	0.000746086	0.0354846	UC
ENSG00000065183_WDR3	0.344172	0.000930258	0.0397752	UC
ENSG00000048649_RSF1	0.345044	0.000280759	0.0233689	UC
ENSG00000111339_ART4	0.34511	0.00141449	0.0493017	UC
ENSG00000117000_RLF	0.345291	0.00098733	0.0409291	UC
ENSG00000185973_TMLHE	0.347571	0.000426241	0.0277334	UC
ENSG00000158092_NCK1	0.349836	0.00142686	0.049314	UC
ENSG00000104408_EIF3E	0.351746	0.000451411	0.0286964	UC
ENSG00000063046_EIF4B	0.354105	5.99781e-05	0.0125823	UC
ENSG00000111897_SERINC1	0.356551	0.000440822	0.0284349	UC
ENSG00000141198_TOM1L1	0.358919	6.71343e-05	0.0126646	UC
ENSG00000089048_ESF1	0.360339	0.000647061	0.0326314	UC
ENSG00000140386_SCAPER	0.370183	3.65036e-05	0.0101021	UC
ENSG00000067066_SP100	0.371335	0.000644096	0.0326314	UC
ENSG00000113638_TTC33	0.371503	0.000603191	0.032354	UC
ENSG00000135766_EGLN1	0.374111	0.000100788	0.01415	UC
ENSG00000118804_STBD1	0.380983	0.00108744	0.0426732	UC
ENSG00000139926_FRMD6	0.383464	0.00128609	0.0471651	UC
ENSG00000197329_PELI1	0.385956	0.000328472	0.0249522	UC
ENSG00000113318_MSH3	0.387114	0.00104442	0.0421287	UC
ENSG00000165650_PDZD8	0.38979	0.00016696	0.0189284	UC
ENSG00000115866_DARS	0.391522	0.000323711	0.024716	UC
ENSG00000124615_MOCS1	0.392027	1.93544e-05	0.0072303	UC
ENSG00000182621_PLCB1	0.408634	0.0012182	0.0454624	UC
ENSG00000152778_IFIT5	0.414516	0.000679963	0.0336942	UC
ENSG00000080561_MID2	0.41567	0.000919139	0.0397541	UC
ENSG00000121440_PDZRN3	0.418643	6.70746e-05	0.0126646	UC
ENSG00000125249_RAP2A	0.42232	3.86222e-06	0.00437952	UC
ENSG00000155111_CDK19	0.423596	0.000348827	0.0255892	UC
ENSG00000173451_THAP2	0.433784	0.000281082	0.0233689	UC
ENSG00000152256_PDK1	0.452572	0.00103467	0.0419617	UC
ENSG00000225439_BOLA3-AS1	0.459199	0.000660068	0.0330365	UC
ENSG00000025293_PHF20	0.463359	0.000168395	0.0189476	UC
ENSG00000155304_HSPA13	0.465706	0.00101091	0.0415928	UC
ENSG00000038427_VCAN	0.468081	0.000394874	0.0268832	UC
ENSG00000282826_FRG1CP	0.483905	0.0010396	0.0420478	UC
ENSG00000091039_OSBPL8	0.48497	0.000496577	0.0297251	UC
ENSG00000180233_ZNRF2	0.513264	0.00010482	0.01415	UC
ENSG00000218283_MORF4L1P1	0.513449	9.82114e-08	0.000293947	UC
ENSG00000256235_SMIM3	0.524769	0.000798875	0.0364727	UC
ENSG00000179859_RNF227	0.53142	0.00062365	0.0324303	UC
ENSG00000069667_RORA	0.546426	0.000242941	0.0217701	UC
ENSG00000266947_AC022916.1	0.565815	0.000962436	0.040686	UC
ENSG00000196741_LINC01560	0.587127	0.000131258	0.0157168	UC
ENSG00000143344_RGL1	0.599201	0.00140958	0.0493017	UC
ENSG00000111885_MAN1A1	0.603981	0.000543908	0.0316715	UC
ENSG00000166128_RAB8B	0.614018	0.000834086	0.0374838	UC
ENSG00000164484_TMEM200A	0.616265	0.000231968	0.0212969	UC
ENSG00000134352_IL6ST	0.633011	0.000360015	0.0259284	UC
ENSG00000197903_HIST1H2BK	0.636594	0.000318402	0.024464	UC
ENSG00000283041_AC008038.1	0.638082	0.000115889	0.0147476	UC
ENSG00000253159_PCDHGA12	0.641135	6.92285e-05	0.0126646	UC
ENSG00000162775_RBM15	0.644116	0.00139663	0.0493017	UC
ENSG00000272269_AL138724.1	0.65139	0.00037386	0.0266038	UC
ENSG00000137970_RPL7P9	0.662807	0.000103244	0.01415	UC
ENSG00000104312_RIPK2	0.664867	0.000330576	0.0249852	UC
ENSG00000214485_RPL7P1	0.672245	6.38785e-05	0.0126646	UC
ENSG00000242071_RPL7AP6	0.707512	0.000607866	0.0323727	UC
ENSG00000168209_DDIT4	0.729481	0.00045935	0.0286964	UC
ENSG00000196083_IL1RAP	0.730156	0.000396879	0.0268832	UC
ENSG00000166896_ATP23	0.762441	0.000102341	0.01415	UC
ENSG00000090659_CD209	0.786369	0.00106783	0.0422569	UC
ENSG00000148848_ADAM12	0.790194	0.000297825	0.0237072	UC
ENSG00000128641_MYO1B	0.791561	0.00130932	0.0477901	UC
ENSG00000145365_TIFA	0.797774	2.4664e-05	0.00820214	UC
ENSG00000157404_KIT	0.841528	0.000285773	0.0233694	UC
ENSG00000162924_REL	0.844064	0.000390067	0.0268832	UC
ENSG00000249353_NPM1P27	0.847061	0.000199029	0.0198565	UC
ENSG00000138411_HECW2	0.877439	2.97175e-05	0.0089127	UC
ENSG00000102755_FLT1	0.878428	9.98821e-06	0.0055179	UC
ENSG00000218426_AL590867.2	0.935786	3.02956e-05	0.0089127	UC
ENSG00000139289_PHLDA1	0.973066	0.000255868	0.0223922	UC
ENSG00000263535_AK4P1	0.990996	0.00132073	0.0479725	UC
ENSG00000144868_TMEM108	1.00616	1.1872e-05	0.00592213	UC
ENSG00000065911_MTHFD2	1.01797	2.58115e-05	0.00839715	UC
ENSG00000281508_AL078639.1	1.03982	0.000861481	0.0384838	UC
ENSG00000108947_EFNB3	1.05695	3.47786e-05	0.0100089	UC
ENSG00000110218_PANX1	1.06877	0.000275236	0.0232707	UC
ENSG00000158859_ADAMTS4	1.06881	0.00137378	0.0489952	UC
ENSG00000228253_MT-ATP8	1.06894	0.000344091	0.0255892	UC
ENSG00000100906_NFKBIA	1.08534	1.5622e-05	0.00631848	UC
ENSG00000133401_PDZD2	1.09094	3.12994e-06	0.00437952	UC
ENSG00000117143_UAP1	1.09291	0.00010785	0.0144105	UC
ENSG00000157368_IL34	1.10084	0.000909617	0.0395492	UC
ENSG00000135245_HILPDA	1.11717	0.000587871	0.032354	UC
ENSG00000164120_HPGD	1.1324	2.07753e-05	0.0072303	UC
ENSG00000081181_ARG2	1.13361	0.00011503	0.0147476	UC
ENSG00000128606_LRRC17	1.14568	0.000389476	0.0268832	UC
ENSG00000182752_PAPPA	1.21002	0.000208924	0.0206218	UC
ENSG00000172817_CYP7B1	1.3017	0.000214644	0.0208581	UC
ENSG00000181617_FDCSP	1.53862	1.66069e-05	0.00654005	UC
ENSG00000166592_RRAD	-2.10411	0.000354811	0.0427505	AN
ENSG00000108691_CCL2	-1.79292	8.83921e-05	0.0255453	AN
ENSG00000104332_SFRP1	-1.48077	0.000473641	0.0456274	AN
ENSG00000157193_LRP8	-1.46193	4.58698e-05	0.0183662	AN
ENSG00000172893_DHCR7	-1.43331	0.000376575	0.0431723	AN
ENSG00000075461_CACNG4	-1.32946	0.000496685	0.047255	AN
ENSG00000250771_AC106865.1	-1.29044	5.84811e-05	0.0188342	AN
ENSG00000204305_AGER	-1.25536	0.000332531	0.0427505	AN
ENSG00000183307_TMEM121B	-1.23448	4.29761e-05	0.0183662	AN
ENSG00000160255_ITGB2	-1.20779	0.000605114	0.0493958	AN
ENSG00000138829_FBN2	-1.07234	2.33196e-05	0.0140078	AN
ENSG00000104549_SQLE	-1.03926	0.00036527	0.0427505	AN
ENSG00000196656_AC004057.1	-1.03736	5.76199e-05	0.0188342	AN
ENSG00000178537_SLC25A20	-1.02974	1.007e-06	0.00349229	AN
ENSG00000163686_ABHD6	-1.01911	8.1058e-06	0.00937031	AN
ENSG00000228594_FNDC10	-0.979438	0.000193084	0.0372008	AN
ENSG00000186792_HYAL3	-0.930662	7.32393e-06	0.00937031	AN
ENSG00000114923_SLC4A3	-0.926947	0.000558732	0.0493958	AN
ENSG00000103021_CCDC113	-0.882575	7.98218e-06	0.00937031	AN
ENSG00000165996_HACD1	-0.870256	0.000138487	0.029719	AN
ENSG00000167552_TUBA1A	-0.856911	0.000501988	0.047255	AN
ENSG00000164574_GALNT10	-0.846508	0.000602758	0.0493958	AN
ENSG00000146386_ABRACL	-0.804117	0.000249175	0.0403582	AN
ENSG00000168938_PPIC	-0.797136	0.000430381	0.0437505	AN
ENSG00000235162_C12orf75	-0.793496	0.000605664	0.0493958	AN
ENSG00000188643_S100A16	-0.771951	0.000246132	0.0403582	AN
ENSG00000185339_TCN2	-0.765771	0.00035466	0.0427505	AN
ENSG00000168268_NT5DC2	-0.752391	4.06397e-06	0.00805363	AN
ENSG00000155393_HEATR3	-0.750425	1.1319e-10	1.57018e-06	AN
ENSG00000130517_PGPEP1	-0.745341	0.000550312	0.0493958	AN
ENSG00000077044_DGKD	-0.715841	0.000240234	0.0403582	AN
ENSG00000258301_VASH1-AS1	-0.699431	6.92112e-05	0.0208717	AN
ENSG00000183048_SLC25A10	-0.651444	0.000395084	0.0437505	AN
ENSG00000120913_PDLIM2	-0.62799	0.000631126	0.0493958	AN
ENSG00000160211_G6PD	-0.618137	0.000138062	0.029719	AN
ENSG00000184207_PGP	-0.607829	0.000145429	0.0305202	AN
ENSG00000109066_TMEM104	-0.596494	8.8584e-06	0.00945259	AN
ENSG00000129925_TMEM8A	-0.596319	5.97394e-05	0.0188342	AN
ENSG00000059588_TARBP1	-0.579886	0.000116046	0.0296603	AN
ENSG00000169710_FASN	-0.576754	0.000633827	0.0493958	AN
ENSG00000143801_PSEN2	-0.57552	0.000352742	0.0427505	AN
ENSG00000197858_GPAA1	-0.547784	6.23584e-06	0.00937031	AN
ENSG00000164077_MON1A	-0.543837	0.0006217	0.0493958	AN
ENSG00000106397_PLOD3	-0.515586	1.75014e-05	0.0134877	AN
ENSG00000277203_F8A1	-0.497589	0.000624976	0.0493958	AN
ENSG00000159363_ATP13A2	-0.497263	0.000207636	0.0378991	AN
ENSG00000188690_UROS	-0.487383	0.000320399	0.0427505	AN
ENSG00000213533_STIMATE	-0.48432	0.000433566	0.0437505	AN
ENSG00000048140_TSPAN17	-0.481132	0.000431687	0.0437505	AN
ENSG00000155592_ZKSCAN2	-0.479525	0.000366732	0.0427505	AN
ENSG00000198860_TSEN15	-0.478076	2.30499e-05	0.0140078	AN
ENSG00000253368_TRNP1	-0.475582	0.000289599	0.0427374	AN
ENSG00000166311_SMPD1	-0.46566	2.50478e-05	0.0140078	AN
ENSG00000106305_AIMP2	-0.458794	0.00032061	0.0427505	AN
ENSG00000006007_GDE1	-0.456815	0.000120819	0.0296603	AN
ENSG00000110583_NAA40	-0.451147	0.000230209	0.0395017	AN
ENSG00000102312_PORCN	-0.436403	0.000567255	0.0493958	AN
ENSG00000197798_FAM118B	-0.435162	0.000370123	0.0427862	AN
ENSG00000005194_CIAPIN1	-0.432387	0.000283412	0.0425433	AN
ENSG00000160953_MUM1	-0.432119	0.000500082	0.047255	AN
ENSG00000167130_DOLPP1	-0.420139	0.000132565	0.0296603	AN
ENSG00000100280_AP1B1	-0.418011	0.000192479	0.0372008	AN
ENSG00000072062_PRKACA	-0.401078	2.41365e-06	0.00669643	AN
ENSG00000067225_PKM	-0.399093	3.88943e-05	0.0183662	AN
ENSG00000131069_ACSS2	-0.393835	0.000394776	0.0437505	AN
ENSG00000111328_CDK2AP1	-0.38666	0.000614272	0.0493958	AN
ENSG00000172269_DPAGT1	-0.360358	5.89833e-05	0.0188342	AN
ENSG00000146535_GNA12	-0.348697	5.1635e-05	0.0183662	AN
ENSG00000186111_PIP5K1C	-0.34053	0.00057944	0.0493958	AN
ENSG00000136243_NUPL2	-0.313857	0.00033837	0.0427505	AN
ENSG00000204310_AGPAT1	-0.310433	0.000199682	0.0376111	AN
ENSG00000124574_ABCC10	-0.307589	0.000316116	0.0427505	AN
ENSG00000173614_NMNAT1	-0.304968	0.000269945	0.042075	AN
ENSG00000118705_RPN2	-0.28331	0.00022052	0.0392187	AN
ENSG00000076043_REXO2	-0.27931	0.000573612	0.0493958	AN
ENSG00000095321_CRAT	-0.239431	0.000433659	0.0437505	AN
ENSG00000167699_GLOD4	0.197487	0.000139254	0.029719	AN
ENSG00000110696_C11orf58	0.224177	5.77222e-05	0.0188342	AN
ENSG00000055483_USP36	0.250357	2.71131e-05	0.0144659	AN
ENSG00000173226_IQCB1	0.271399	0.000364303	0.0427505	AN
ENSG00000107745_MICU1	0.272525	0.000230655	0.0395017	AN
ENSG00000121067_SPOP	0.272837	0.000403755	0.0437505	AN
ENSG00000206418_RAB12	0.274604	0.000581401	0.0493958	AN
ENSG00000075089_ACTR6	0.274861	0.000118021	0.0296603	AN
ENSG00000133606_MKRN1	0.274917	0.000633586	0.0493958	AN
ENSG00000134759_ELP2	0.276342	2.33872e-05	0.0140078	AN
ENSG00000135945_REV1	0.279528	0.000582932	0.0493958	AN
ENSG00000167881_SRP68	0.284496	1.30175e-05	0.0112861	AN
ENSG00000278311_GGNBP2	0.284921	0.000399022	0.0437505	AN
ENSG00000119537_KDSR	0.288693	0.000310648	0.0427505	AN
ENSG00000158526_TSR2	0.288752	0.000179315	0.03605	AN
ENSG00000076984_MAP2K7	0.292702	0.000108524	0.0296603	AN
ENSG00000004975_DVL2	0.294167	0.000200705	0.0376111	AN
ENSG00000131051_RBM39	0.295597	0.000117004	0.0296603	AN
ENSG00000160695_VPS11	0.300406	3.56302e-06	0.00805363	AN
ENSG00000100099_HPS4	0.309828	0.000187454	0.0371481	AN
ENSG00000156976_EIF4A2	0.337384	0.000147409	0.0305202	AN
ENSG00000198783_ZNF830	0.337555	0.000121762	0.0296603	AN
ENSG00000148090_AUH	0.339482	0.000618867	0.0493958	AN
ENSG00000172977_KAT5	0.340217	0.00012404	0.0296603	AN
ENSG00000116266_STXBP3	0.34077	0.000504162	0.047255	AN
ENSG00000164695_CHMP4C	0.346019	0.000598032	0.0493958	AN
ENSG00000164609_SLU7	0.349072	2.52447e-05	0.0140078	AN
ENSG00000160961_ZNF333	0.349553	0.000441542	0.0437505	AN
ENSG00000196470_SIAH1	0.364032	0.000430794	0.0437505	AN
ENSG00000109445_ZNF330	0.364782	3.22321e-05	0.0159687	AN
ENSG00000164331_ANKRA2	0.371933	0.000448003	0.0440758	AN
ENSG00000095574_IKZF5	0.390666	0.00012987	0.0296603	AN
ENSG00000169871_TRIM56	0.392335	0.000575406	0.0493958	AN
ENSG00000134046_MBD2	0.396215	0.000280046	0.0425433	AN
ENSG00000080822_CLDND1	0.401832	0.000358403	0.0427505	AN
ENSG00000112511_PHF1	0.402929	0.000631394	0.0493958	AN
ENSG00000198408_OGA	0.407443	0.000395222	0.0437505	AN
ENSG00000273820_USP27X	0.418551	0.00035172	0.0427505	AN
ENSG00000154781_CCDC174	0.427592	2.25677e-05	0.0140078	AN
ENSG00000141582_CBX4	0.43883	0.000391217	0.0437505	AN
ENSG00000108799_EZH1	0.441034	0.000203347	0.0376111	AN
ENSG00000143217_NECTIN4	0.450859	0.000126682	0.0296603	AN
ENSG00000117614_SYF2	0.455219	0.00021778	0.0392187	AN
ENSG00000127957_PMS2P3	0.46979	0.000250202	0.0403582	AN
ENSG00000148690_FRA10AC1	0.477868	0.000629493	0.0493958	AN
ENSG00000220205_VAMP2	0.483936	0.00013068	0.0296603	AN
ENSG00000070759_TESK2	0.49076	0.000327813	0.0427505	AN
ENSG00000219545_UMAD1	0.494735	0.000285216	0.0425433	AN
ENSG00000138433_CIR1	0.501689	2.1821e-05	0.0140078	AN
ENSG00000111276_CDKN1B	0.546518	5.14663e-05	0.0183662	AN
ENSG00000119950_MXI1	0.557927	0.000334475	0.0427505	AN
ENSG00000113240_CLK4	0.558172	0.000114194	0.0296603	AN
ENSG00000067066_SP100	0.562118	6.5255e-06	0.00937031	AN
ENSG00000282826_FRG1CP	0.562851	0.000426871	0.0437505	AN
ENSG00000154803_FLCN	0.57024	4.76786e-05	0.0183662	AN
ENSG00000118985_ELL2	0.583945	0.000622361	0.0493958	AN
ENSG00000217128_FNIP1	0.591132	0.000456578	0.0442912	AN
ENSG00000139631_CSAD	0.607366	0.000359585	0.0427505	AN
ENSG00000164463_CREBRF	0.611896	0.000509702	0.0474536	AN
ENSG00000013441_CLK1	0.619957	0.000341264	0.0427505	AN
ENSG00000234585_CCT6P3	0.625392	6.22617e-05	0.0191932	AN
ENSG00000112715_VEGFA	0.632623	0.000437767	0.0437505	AN
ENSG00000261505_AL031714.1	0.643191	8.00289e-05	0.0236204	AN
ENSG00000174738_NR1D2	0.655395	0.000122427	0.0296603	AN
ENSG00000198355_PIM3	0.664962	0.000334691	0.0427505	AN
ENSG00000273247_AC097376.2	0.677662	0.000600418	0.0493958	AN
ENSG00000169242_EFNA1	0.696789	0.000524959	0.0485297	AN
ENSG00000167766_ZNF83	0.704824	0.000528257	0.0485297	AN
ENSG00000233016_SNHG7	0.705947	3.09003e-05	0.0158759	AN
ENSG00000222019_URAHP	0.714697	0.000419767	0.0437505	AN
ENSG00000152404_CWF19L2	0.71837	1.02312e-05	0.0101376	AN
ENSG00000214174_AMZ2P1	0.722264	1.09894e-05	0.010163	AN
ENSG00000062716_VMP1	0.742923	0.000354152	0.0427505	AN
ENSG00000189060_H1F0	0.752142	0.000575398	0.0493958	AN
ENSG00000146278_PNRC1	0.757343	0.000273168	0.0421043	AN
ENSG00000078018_MAP2	0.762141	0.000437919	0.0437505	AN
ENSG00000281026_N4BP2L2-IT2	0.775171	4.95299e-05	0.0183662	AN
ENSG00000230715_AC018638.2	0.812751	4.55106e-05	0.0183662	AN
ENSG00000283041_AC008038.1	0.842244	4.57076e-05	0.0183662	AN
ENSG00000116717_GADD45A	0.870991	1.4306e-05	0.0116737	AN
ENSG00000041353_RAB27B	0.909471	0.000428591	0.0437505	AN
ENSG00000213553_RPLP0P6	0.918463	0.000339765	0.0427505	AN
ENSG00000126368_NR1D1	0.926688	0.000305233	0.0427505	AN
ENSG00000285130_AL358113.1	0.92969	3.35109e-07	0.00154954	AN
ENSG00000137970_RPL7P9	0.94664	0.00025012	0.0403582	AN
ENSG00000025039_RRAGD	0.949332	0.000174348	0.035567	AN
ENSG00000229638_RPL4P4	0.972286	0.000453843	0.0442912	AN
ENSG00000224081_SLC44A3-AS1	1.00482	0.000114083	0.0296603	AN
ENSG00000170442_KRT86	1.03536	0.000595226	0.0493958	AN
ENSG00000214182_PTMAP5	1.04127	1.6093e-07	0.00111621	AN
ENSG00000273284_AP001033.2	1.06405	0.000301755	0.0427505	AN
ENSG00000156804_FBXO32	1.07384	0.000441358	0.0437505	AN
ENSG00000128242_GAL3ST1	1.15341	0.000264437	0.0416849	AN
ENSG00000130222_GADD45G	1.15846	0.000320347	0.0427505	AN
ENSG00000196205_EEF1A1P5	1.19431	0.000257942	0.0411285	AN
ENSG00000218426_AL590867.2	1.22871	5.03815e-05	0.0183662	AN
ENSG00000102678_FGF9	1.353	0.000543844	0.0493958	AN
ENSG00000213178_RPL22P1	1.43036	0.000293499	0.0427505	AN
ENSG00000233476_EEF1A1P6	1.44815	0.000424334	0.0437505	AN
ENSG00000160179_ABCG1	1.63567	0.000224858	0.0394839	AN
ENSG00000163661_PTX3	2.00445	0.000562668	0.0493958	AN
ENSG00000111796_KLRB1	-1.57767	6.18424e-06	0.018161	CN
ENSG00000110665_C11orf21	-1.0835	3.61207e-05	0.0450937	CN
ENSG00000228589_SPCS2P4	1.01836	1.20458e-05	0.0225572	CN
ENSG00000228253_MT-ATP8	1.37963	3.55134e-07	0.00266013	CN
ENSG00000196205_EEF1A1P5	1.50725	8.25115e-06	0.018161	CN
ENSG00000164379_FOXQ1	1.58912	8.48587e-06	0.018161	CN
ENSG00000218426_AL590867.2	1.71287	5.31343e-06	0.018161	CN
ENSG00000125398_SOX9	1.87386	1.58205e-05	0.026334	CN
ENSG00000105825_TFPI2	1.89132	1.85617e-05	0.0278073	CN
ENSG00000103044_HAS3	2.05995	3.46307e-06	0.0172934	CN
ENSG00000166396_SERPINB7	2.0951	3.01395e-05	0.0410472	CN
ENSG00000134070_IRAK2	2.83597	1.16366e-08	0.000174329	CN
ENSG00000211892_IGHG4	4.06243	1.80644e-08	0.000278751	CP
ENSG00000100906_NFKBIA	0.489603	6.08388e-06	0.0469402	CP
ENSG00000142623_PADI1	-2.07181	3.4603e-07	0.0012464	VF
ENSG00000226145_KRT16P6	-2.0493	9.84397e-06	0.00628139	VF
ENSG00000186652_PRG2	-1.72522	0.000594254	0.047044	VF
ENSG00000086570_FAT2	-1.62446	0.000149464	0.0247526	VF
ENSG00000007171_NOS2	-1.58473	0.000133235	0.0232149	VF
ENSG00000183691_NOG	-1.58294	0.000278535	0.0346886	VF
ENSG00000185269_NOTUM	-1.49119	0.000306744	0.0353566	VF
ENSG00000002726_AOC1	-1.39314	0.000474863	0.0435785	VF
ENSG00000146070_PLA2G7	-1.38084	6.86726e-06	0.00609362	VF
ENSG00000174945_AMZ1	-1.37866	7.53104e-05	0.0183911	VF
ENSG00000186907_RTN4RL2	-1.37401	0.000261759	0.0340613	VF
ENSG00000075275_CELSR1	-1.34839	7.54436e-06	0.00609362	VF
ENSG00000183010_PYCR1	-1.3053	5.953e-06	0.00609362	VF
ENSG00000255398_HCAR3	-1.29486	1.32652e-05	0.00764498	VF
ENSG00000179761_PIPOX	-1.28413	0.000618377	0.0473914	VF
ENSG00000173578_XCR1	-1.27437	5.19692e-05	0.0171931	VF
ENSG00000156966_B3GNT7	-1.25326	0.000132529	0.0232149	VF
ENSG00000164007_CLDN19	-1.22835	0.000282407	0.0346886	VF
ENSG00000143196_DPT	-1.22017	1.13689e-06	0.00295613	VF
ENSG00000145287_PLAC8	-1.13506	0.000140474	0.0240946	VF
ENSG00000206557_TRIM71	-1.10613	0.000626733	0.0477776	VF
ENSG00000006016_CRLF1	-1.02095	0.000426992	0.0410167	VF
ENSG00000185215_TNFAIP2	-1.0142	5.2785e-05	0.0171931	VF
ENSG00000168621_GDNF	-1.00441	5.36383e-06	0.00609362	VF
ENSG00000135919_SERPINE2	-0.929431	0.000321598	0.0358682	VF
ENSG00000163362_INAVA	-0.896961	0.000609517	0.0472146	VF
ENSG00000140479_PCSK6	-0.881205	6.30824e-05	0.0174006	VF
ENSG00000112902_SEMA5A	-0.870747	0.000539308	0.0459784	VF
ENSG00000139278_GLIPR1	-0.866649	9.99461e-06	0.00628139	VF
ENSG00000100167_SEPT3	-0.866404	2.91159e-05	0.0134027	VF
ENSG00000074590_NUAK1	-0.860869	0.000120756	0.023126	VF
ENSG00000124766_SOX4	-0.850028	0.00026241	0.0340613	VF
ENSG00000100196_KDELR3	-0.825256	0.000218777	0.0306033	VF
ENSG00000137267_TUBB2A	-0.822248	0.000313288	0.0355335	VF
ENSG00000112149_CD83	-0.822132	0.000591217	0.047044	VF
ENSG00000119699_TGFB3	-0.812711	0.000576707	0.0469257	VF
ENSG00000154736_ADAMTS5	-0.811798	1.43621e-06	0.00295613	VF
ENSG00000182534_MXRA7	-0.800773	7.98412e-06	0.00609362	VF
ENSG00000196656_AC004057.1	-0.781388	0.000586462	0.047044	VF
ENSG00000127241_MASP1	-0.773567	9.22715e-05	0.020453	VF
ENSG00000237651_C2orf74	-0.757403	0.000121508	0.023126	VF
ENSG00000142871_CYR61	-0.753895	0.000300271	0.0353566	VF
ENSG00000140416_TPM1	-0.751516	2.97673e-05	0.0134027	VF
ENSG00000135905_DOCK10	-0.74803	0.0005302	0.0459704	VF
ENSG00000185477_GPRIN3	-0.746037	0.000155335	0.0254327	VF
ENSG00000142798_HSPG2	-0.735853	0.000237824	0.0323087	VF
ENSG00000104953_TLE6	-0.710583	0.000652002	0.0494423	VF
ENSG00000152952_PLOD2	-0.708587	8.45866e-06	0.00609362	VF
ENSG00000115339_GALNT3	-0.707067	0.000555707	0.0465501	VF
ENSG00000113319_RASGRF2	-0.700313	0.000116306	0.023126	VF
ENSG00000172403_SYNPO2	-0.696093	0.000195481	0.0287398	VF
ENSG00000038945_MSR1	-0.692947	0.000127542	0.0232149	VF
ENSG00000196526_AFAP1	-0.691043	0.000377147	0.0388138	VF
ENSG00000123342_MMP19	-0.690975	0.000392101	0.0395062	VF
ENSG00000105851_PIK3CG	-0.670814	0.000349248	0.0369997	VF
ENSG00000139679_LPAR6	-0.651004	0.000133734	0.0232149	VF
ENSG00000012232_EXTL3	-0.631081	0.000247205	0.032979	VF
ENSG00000146674_IGFBP3	-0.61384	0.000427021	0.0410167	VF
ENSG00000123131_PRDX4	-0.597261	3.31123e-05	0.0136309	VF
ENSG00000126882_FAM78A	-0.593236	0.000234356	0.0321582	VF
ENSG00000205413_SAMD9	-0.579442	7.9521e-06	0.00609362	VF
ENSG00000005844_ITGAL	-0.564266	4.72944e-05	0.0170354	VF
ENSG00000170006_TMEM154	-0.555235	3.14151e-05	0.0134192	VF
ENSG00000183049_CAMK1D	-0.549558	7.32323e-05	0.0183911	VF
ENSG00000119922_IFIT2	-0.549437	0.000329965	0.0358682	VF
ENSG00000152804_HHEX	-0.548447	6.84714e-05	0.017937	VF
ENSG00000146966_DENND2A	-0.548289	8.89225e-05	0.020453	VF
ENSG00000109586_GALNT7	-0.545028	0.000292967	0.0351755	VF
ENSG00000174125_TLR1	-0.532403	0.000215763	0.0304776	VF
ENSG00000140968_IRF8	-0.520244	0.000390826	0.0395062	VF
ENSG00000163249_CCNYL1	-0.516343	0.000302245	0.0353566	VF
ENSG00000121454_LHX4	-0.515954	0.000122444	0.023126	VF
ENSG00000140743_CDR2	-0.50547	8.37683e-06	0.00609362	VF
ENSG00000137509_PRCP	-0.501197	5.75316e-05	0.0171931	VF
ENSG00000038002_AGA	-0.496418	0.00060405	0.0472146	VF
ENSG00000151458_ANKRD50	-0.49175	0.000608692	0.0472146	VF
ENSG00000076706_MCAM	-0.486664	1.79989e-05	0.00905838	VF
ENSG00000101639_CEP192	-0.484078	0.000163424	0.0258749	VF
ENSG00000106080_FKBP14	-0.465374	0.000465715	0.043013	VF
ENSG00000075624_ACTB	-0.463904	3.71852e-05	0.0144801	VF
ENSG00000129465_RIPK3	-0.462227	7.50057e-05	0.0183911	VF
ENSG00000132334_PTPRE	-0.460937	0.000116344	0.023126	VF
ENSG00000165168_CYBB	-0.446738	0.000575915	0.0469257	VF
ENSG00000247626_MARS2	-0.444174	0.000114038	0.023126	VF
ENSG00000140450_ARRDC4	-0.443725	0.000605154	0.0472146	VF
ENSG00000159128_IFNGR2	-0.423441	8.90616e-05	0.020453	VF
ENSG00000138764_CCNG2	-0.402464	0.000306486	0.0353566	VF
ENSG00000139687_RB1	-0.396945	4.32339e-06	0.00609362	VF
ENSG00000163251_FZD5	-0.396644	0.000315678	0.0355335	VF
ENSG00000129675_ARHGEF6	-0.396246	0.00049018	0.0443229	VF
ENSG00000102699_PARP4	-0.395819	0.000536024	0.0459704	VF
ENSG00000129480_DTD2	-0.392619	0.000328142	0.0358682	VF
ENSG00000167601_AXL	-0.392067	0.000440572	0.0414887	VF
ENSG00000102024_PLS3	-0.381524	0.000548162	0.0461867	VF
ENSG00000105971_CAV2	-0.379943	0.000445299	0.0416615	VF
ENSG00000138182_KIF20B	-0.376642	0.000296226	0.0352729	VF
ENSG00000071967_CYBRD1	-0.376042	0.000502333	0.0446766	VF
ENSG00000184060_ADAP2	-0.373611	0.000286504	0.0346886	VF
ENSG00000122335_SERAC1	-0.372838	0.000107818	0.023126	VF
ENSG00000115419_GLS	-0.359867	0.000339666	0.0365217	VF
ENSG00000165506_DNAAF2	-0.356081	1.7811e-05	0.00905838	VF
ENSG00000139350_NEDD1	-0.335481	0.000173135	0.0268229	VF
ENSG00000150540_HNMT	-0.333507	0.000419973	0.0410167	VF
ENSG00000174442_ZWILCH	-0.328634	0.000192041	0.028525	VF
ENSG00000173085_COQ2	-0.326607	0.000523775	0.0457367	VF
ENSG00000211455_STK38L	-0.317002	0.000578755	0.0469257	VF
ENSG00000105939_ZC3HAV1	-0.314647	0.000579316	0.0469257	VF
ENSG00000109689_STIM2	-0.314644	3.52772e-05	0.0141187	VF
ENSG00000153179_RASSF3	-0.313507	0.000533783	0.0459704	VF
ENSG00000144736_SHQ1	-0.308185	8.70501e-05	0.020453	VF
ENSG00000150093_ITGB1	-0.307124	0.000214883	0.0304776	VF
ENSG00000260916_CCPG1	-0.301156	0.000274009	0.0346786	VF
ENSG00000118564_FBXL5	-0.293184	0.00041962	0.0410167	VF
ENSG00000137842_TMEM62	-0.276981	9.09084e-05	0.020453	VF
ENSG00000114861_FOXP1	-0.26987	0.000493326	0.0443229	VF
ENSG00000065802_ASB1	-0.262883	1.00272e-05	0.00628139	VF
ENSG00000107669_ATE1	-0.262171	0.000119613	0.023126	VF
ENSG00000155755_TMEM237	-0.2267	0.000579732	0.0469257	VF
ENSG00000142166_IFNAR1	-0.215161	0.00027434	0.0346786	VF
ENSG00000186106_ANKRD46	-0.195746	0.000330977	0.0358682	VF
ENSG00000108654_DDX5	-0.176894	0.000261356	0.0340613	VF
ENSG00000108344_PSMD3	0.177652	0.000185414	0.0282581	VF
ENSG00000143862_ARL8A	0.180705	0.000438845	0.0414887	VF
ENSG00000013561_RNF14	0.197098	0.000517325	0.0454489	VF
ENSG00000214753_HNRNPUL2	0.201079	0.000344987	0.0368191	VF
ENSG00000131748_STARD3	0.211895	0.000613056	0.0472348	VF
ENSG00000177370_TIMM22	0.223597	0.000546939	0.0461867	VF
ENSG00000132792_CTNNBL1	0.225076	0.000313255	0.0355335	VF
ENSG00000119392_GLE1	0.229935	0.000456261	0.0424116	VF
ENSG00000170949_ZNF160	0.238406	5.3392e-05	0.0171931	VF
ENSG00000119537_KDSR	0.239237	5.92936e-05	0.0171931	VF
ENSG00000197872_FAM49A	0.245554	5.84338e-05	0.0171931	VF
ENSG00000119673_ACOT2	0.247509	0.000122513	0.023126	VF
ENSG00000151929_BAG3	0.252456	0.000117296	0.023126	VF
ENSG00000276045_ORAI1	0.262397	0.000490035	0.0443229	VF
ENSG00000182512_GLRX5	0.263196	9.07393e-05	0.020453	VF
ENSG00000103510_KAT8	0.266345	0.000593357	0.047044	VF
ENSG00000241839_PLEKHO2	0.293861	0.000274386	0.0346786	VF
ENSG00000111321_LTBR	0.30564	6.85277e-06	0.00609362	VF
ENSG00000186577_SMIM29	0.313821	6.09491e-05	0.0172187	VF
ENSG00000142655_PEX14	0.314889	0.000158328	0.0256313	VF
ENSG00000174996_KLC2	0.318346	0.000285823	0.0346886	VF
ENSG00000163931_TKT	0.326192	1.72114e-05	0.00905838	VF
ENSG00000241878_PISD	0.328668	0.000561937	0.0467999	VF
ENSG00000171631_P2RY6	0.344946	5.96651e-05	0.0171931	VF
ENSG00000108219_TSPAN14	0.349659	2.89601e-07	0.0012464	VF
ENSG00000213801_ZNF321P	0.350528	0.00012617	0.0232149	VF
ENSG00000155849_ELMO1	0.373141	0.000423168	0.0410167	VF
ENSG00000237523_LINC00857	0.378213	6.5216e-05	0.0174006	VF
ENSG00000280832_GSEC	0.385349	0.000355346	0.037371	VF
ENSG00000175866_BAIAP2	0.406214	0.000123591	0.023126	VF
ENSG00000165912_PACSIN3	0.426923	0.000285044	0.0346886	VF
ENSG00000076826_CAMSAP3	0.427647	0.000495279	0.0443229	VF
ENSG00000259891_AC107375.1	0.438746	0.000418484	0.0410167	VF
ENSG00000131873_CHSY1	0.441345	0.000511315	0.0451965	VF
ENSG00000107738_VSIR	0.461417	1.89405e-05	0.00909651	VF
ENSG00000131459_GFPT2	0.473152	0.000370407	0.0384491	VF
ENSG00000198496_NBR2	0.480098	0.000331099	0.0358682	VF
ENSG00000186395_KRT10	0.485312	0.000115401	0.023126	VF
ENSG00000111405_ENDOU	0.507514	0.000382951	0.0391316	VF
ENSG00000120875_DUSP4	0.515795	0.000148026	0.0247526	VF
ENSG00000113645_WWC1	0.518108	5.49124e-05	0.0171931	VF
ENSG00000231924_PSG1	0.535613	0.000430456	0.041073	VF
ENSG00000159713_TPPP3	0.564817	0.000424343	0.0410167	VF
ENSG00000205609_EIF3CL	0.575204	1.82324e-05	0.00905838	VF
ENSG00000088002_SULT2B1	0.575545	6.50301e-05	0.0174006	VF
ENSG00000108786_HSD17B1	0.603129	5.50387e-05	0.0171931	VF
ENSG00000171303_KCNK3	0.630989	0.000187676	0.0282581	VF
ENSG00000139835_GRTP1	0.669859	5.08587e-06	0.00609362	VF
ENSG00000213853_EMP2	0.677951	1.29096e-06	0.00295613	VF
ENSG00000196517_SLC6A9	0.685535	0.000204951	0.0298276	VF
ENSG00000186354_C9orf47	0.691734	0.000239938	0.0323087	VF
ENSG00000186787_SPIN2B	0.712528	4.30774e-05	0.0163332	VF
ENSG00000144868_TMEM108	0.719284	0.000188283	0.0282581	VF
ENSG00000233746_LINC00656	0.742285	0.000211824	0.0304776	VF
ENSG00000279662_AC131649.2	0.748158	3.16667e-05	0.0134192	VF
ENSG00000274020_LINC01138	0.783069	0.000169327	0.0265181	VF
ENSG00000228253_MT-ATP8	0.813449	0.000370934	0.0384491	VF
ENSG00000183822_NCF4-AS1	0.837797	0.000161833	0.0258749	VF
ENSG00000108785_HSD17B1P1	0.927825	5.23762e-05	0.0171931	VF
ENSG00000227733_AC239809.3	0.954791	1.15355e-07	0.00122353	VF
ENSG00000168874_ATOH8	0.955834	4.55666e-05	0.0168339	VF
ENSG00000172005_MAL	0.979754	0.000148507	0.0247526	VF
ENSG00000218426_AL590867.2	1.12524	0.000228771	0.0316935	VF
ENSG00000180509_KCNE1	1.12545	1.69841e-07	0.00122353	VF
ENSG00000166676_TVP23A	1.15039	3.2271e-06	0.005812	VF
ENSG00000233476_EEF1A1P6	1.30659	0.000129453	0.0232149	VF
ENSG00000196205_EEF1A1P5	1.36536	1.31594e-05	0.00764498	VF
ENSG00000108551_RASD1	1.72772	8.395e-06	0.00609362	VF
ENSG00000143196_DPT	-1.35757	1.03899e-05	0.0226099	VI
ENSG00000177954_RPS27	-0.354741	9.03906e-06	0.0226099	VI
ENSG00000198918_RPL39	-0.354688	7.76658e-06	0.0226099	VI
ENSG00000119537_KDSR	0.267837	1.1886e-05	0.0226325	VI
ENSG00000108219_TSPAN14	0.372907	6.45655e-06	0.0226099	VI
ENSG00000244300_GATA2-AS1	0.483072	1.403e-05	0.0237465	VI
ENSG00000113645_WWC1	0.50336	3.72622e-05	0.0473012	VI
ENSG00000213853_EMP2	0.65536	2.0647e-05	0.0300334	VI
ENSG00000188897_AC099489.1	0.676713	4.85924e-07	0.00740208	VI
ENSG00000228253_MT-ATP8	0.876219	2.16876e-05	0.0300334	VI
ENSG00000180509_KCNE1	1.13432	1.20369e-06	0.00916787	VI
ENSG00000108551_RASD1	1.66894	9.8511e-06	0.0226099	VI
ENSG00000159251_ACTC1	-1.51772	2.08473e-05	0.0380223	VM
ENSG00000174749_FAM241A	-0.399976	7.49369e-06	0.0230041	VM
ENSG00000155926_SLA	0.693173	3.15258e-05	0.0483889	VM
ENSG00000173621_LRFN4	0.749481	6.30843e-06	0.0230041	VM
ENSG00000227733_AC239809.3	0.856142	2.22947e-05	0.0380223	VM
ENSG00000180509_KCNE1	1.11363	6.73836e-09	0.000103427	VM
ENSG00000168874_ATOH8	1.18505	2.20796e-06	0.0112967	VM
ENSG00000271394_RF00100	1.55726	1.98659e-05	0.0380223	VM
ENSG00000182472_CAPN12	1.78293	1.65752e-05	0.0380223	VM
ENSG00000284969_AL049629.2	2.99764	7.05138e-07	0.00541158	VM

## Sheet: e
supplementary file 1e. The identified DEGs in the seven layers of the female-infant placentas between Tibetans and Han migrants.
Genes	log2FoldChange	p-value	adjusted-p	Layers
ENSG00000115165_CYTIP	-1.57114	1.63122e-06	0.0064836	UC
ENSG00000104951_IL4I1	-1.54255	2.77821e-06	0.00752358	UC
ENSG00000158517_NCF1	-1.45399	5.10032e-05	0.0255883	UC
ENSG00000104972_LILRB1	-1.3559	0.000121504	0.0468562	UC
ENSG00000160791_CCR5	-1.3238	3.57155e-06	0.00752358	UC
ENSG00000135744_AGT	-1.31414	6.27608e-05	0.0295192	UC
ENSG00000258227_CLEC5A	-1.30836	2.69703e-05	0.01933	UC
ENSG00000196126_HLA-DRB1	-1.2587	0.000148291	0.0485203	UC
ENSG00000186074_CD300LF	-1.20574	0.000145918	0.0485203	UC
ENSG00000105967_TFEC	-1.12943	2.46109e-05	0.0185209	UC
ENSG00000163823_CCR1	-1.00671	1.08319e-05	0.0116451	UC
ENSG00000066294_CD84	-0.9129	1.7553e-05	0.0162465	UC
ENSG00000178562_CD28	-0.89469	6.09061e-05	0.0295192	UC
ENSG00000110446_SLC15A3	-0.617009	6.86793e-05	0.031324	UC
ENSG00000069424_KCNAB2	-0.571913	0.000109105	0.0468562	UC
ENSG00000270069_MIR222HG	0.54938	4.84253e-05	0.0255883	UC
ENSG00000125968_ID1	0.782326	1.72286e-05	0.0162465	UC
ENSG00000213442_RPL18AP3	0.880927	0.000140755	0.0485203	UC
ENSG00000170837_GPR27	1.02924	1.00019e-05	0.0115798	UC
ENSG00000178464_RPL10P16	1.11723	1.7231e-06	0.0064836	UC
ENSG00000186854_TRABD2A	1.27887	9.143e-05	0.0404739	UC
ENSG00000112936_C7	1.66556	0.000124526	0.0468562	UC
ENSG00000145721_LIX1	2.24875	3.94786e-05	0.022939	UC
ENSG00000082497_SERTAD4	1.8865	9.50457e-08	0.00132351	AN
ENSG00000188933_USP32P1	4.07014	1.64405e-11	2.48958e-07	CN
ENSG00000095203_EPB41L4B	-1.16135	1.77001e-06	0.0134016	CN
ENSG00000112964_GHR	0.673445	1.00148e-05	0.0411499	VF
ENSG00000229644_NAMPTP1	0.897004	1.07913e-05	0.0411499	VF
ENSG00000156486_KCNS2	1.13025	5.79516e-06	0.0411499	VF
ENSG00000249898_MCPH1-AS1	2.06	9.65001e-07	0.0147192	VF
ENSG00000149527_PLCH2	-1.05915	2.57392e-06	0.0393527	VM

## Sheet: f
supplementary file 1f. The P values of the Module-Trait correlation in the male-infant placentas.
	Population	BW	BPD	FL	GT	PW	PLV	AG	AFMD	AFI	FH	FUH	Layers
ME_001	0.56259	0.543671	0.847262	0.425157	0.623991	0.717129	0.126139	0.900964	0.122874	0.79572	0.522956	0.682486	UC
ME_002	0.740556	0.394557	0.518938	0.551455	0.45214	0.739016	0.176557	0.888909	0.724852	0.829511	0.976663	0.133106	UC
ME_003	0.143415	0.693835	0.299524	0.46372	0.304588	0.134058	0.38402	0.607782	0.826282	0.391193	0.638936	0.529208	UC
ME_004	0.0127135	0.025193	0.545373	0.271379	0.643909	0.591975	0.333587	0.644686	0.587735	0.797151	0.152081	0.609432	UC
ME_005	0.0977808	0.0574836	0.523185	0.489105	0.217303	0.760554	0.224542	0.538372	0.0752668	0.181713	0.686613	0.952377	UC
ME_006	0.234189	0.154046	0.918871	0.9501	0.983815	0.360611	0.797481	0.207785	0.12045	0.428803	0.532669	0.803049	UC
ME_007	0.514168	0.313856	0.182528	0.0791484	0.192773	0.0910844	0.247352	0.443989	0.812755	0.883457	0.787904	0.402923	UC
ME_008	0.00116657	0.00865972	0.629512	0.523853	0.526718	0.681365	0.0517692	0.424126	0.535863	0.193026	0.418775	0.797551	UC
ME_009	0.0141279	0.00639628	0.270469	0.113479	0.529269	0.101319	0.0415836	0.73201	0.44578	0.61903	0.342364	0.713119	UC
ME_010	0.425641	0.101487	0.486529	0.201655	0.976156	0.330762	0.762464	0.474942	0.14104	0.509967	0.120099	0.510658	UC
ME_011	0.748104	0.622649	0.881857	0.670016	0.586204	0.787631	0.390672	0.666327	0.0536259	0.310449	0.406869	0.528569	UC
ME_012	0.699715	0.799626	0.764376	0.687526	0.342071	0.0763279	0.157558	0.145957	0.577039	0.483933	0.0185774	0.418989	UC
ME_013	0.181486	0.13628	0.816606	0.720401	0.0566994	0.0552773	0.0632864	0.174891	0.250026	0.0586283	0.0194227	0.15235	UC
ME_014	0.0799312	0.0728493	0.497231	0.282624	0.195293	0.517654	0.291627	0.509254	0.357962	0.248437	0.742627	0.810988	UC
ME_015	0.0779715	0.499146	0.029504	0.116036	0.33767	0.347826	0.716631	0.330738	0.0872333	0.00940657	0.456524	0.0444525	AN
ME_016	0.0256659	0.872108	0.323266	0.571506	0.450516	0.248512	0.578359	0.436065	0.0239775	0.00791044	0.926045	0.249407	AN
ME_017	0.516025	0.582827	0.309009	0.167894	0.0243855	0.355442	0.87146	0.935518	0.426485	0.468723	0.760729	0.0353363	AN
ME_018	0.0415425	0.149568	0.600839	0.218799	0.804545	0.631558	0.767729	0.743427	0.790922	0.630954	0.484457	0.0195484	AN
ME_019	0.359306	0.112371	0.0481552	0.0146847	0.760962	0.212204	0.0552172	0.181726	0.106428	0.065886	0.484162	0.0327638	AN
ME_020	0.686144	0.388608	0.15038	0.172086	0.391405	0.133741	0.590219	0.495089	0.0296956	0.0594588	0.754311	0.19739	AN
ME_021	0.0743779	0.765447	0.511246	0.194003	0.0449895	0.547859	0.738374	0.815782	0.218575	0.309036	0.328361	0.861759	AN
ME_022	0.281448	0.415317	0.112542	0.0567052	0.0402106	0.304476	0.582253	0.918823	0.847758	0.636819	0.100057	0.51085	AN
ME_023	0.967658	0.967316	0.386292	0.42119	0.243103	0.8615	0.392875	0.649745	0.732992	0.161043	0.632283	0.216045	AN
ME_024	0.918313	0.961379	0.71912	0.496762	0.838001	0.468133	0.256957	0.537767	0.303288	0.0856381	0.401227	0.290082	AN
ME_025	0.213377	0.309069	0.336576	0.162719	0.503511	0.563937	0.40973	0.159699	0.882254	0.942543	0.0229397	0.52259	AN
ME_026	0.747376	0.243363	0.508765	0.213856	0.300469	0.452107	0.446809	0.749515	0.585541	0.826045	0.155543	0.432716	AN
ME_027	0.508006	0.388214	0.210618	0.146022	0.0356762	0.39452	0.45693	0.326223	0.765308	0.355728	0.125447	0.940239	AN
ME_028	0.00303032	0.849752	0.952325	0.788577	0.713034	0.379551	0.356224	0.648388	0.215335	0.190904	0.562251	0.443892	AN
ME_029	0.179103	0.431141	0.328224	0.245802	0.906908	0.857156	0.769668	0.31869	0.252953	0.128358	0.294259	0.147171	AN
ME_030	0.0830261	0.94481	0.824847	0.821054	0.0876474	0.552264	0.704852	0.296224	0.47851	0.531593	0.51232	0.620606	AN
ME_031	0.00212361	0.181021	0.761917	0.498637	0.621827	0.780836	0.967782	0.327875	0.02884	0.0272675	0.756337	0.424053	AN
ME_032	0.319762	0.113226	0.311409	0.0795743	0.0479684	0.525568	0.45558	0.888766	0.939009	0.808323	0.43887	0.0359655	AN
ME_033	0.196783	0.29549	0.0795304	0.0267636	0.00285138	0.774453	0.326627	0.639712	0.9276	0.693985	0.100521	0.397001	AN
ME_034	0.728742	0.334844	0.533366	0.226376	0.00499278	0.854893	0.499753	0.497067	0.249006	0.319614	0.682807	0.574771	AN
ME_035	0.0874643	0.822688	0.272825	0.305257	0.0176909	0.370689	0.387826	0.878899	0.369997	0.212426	0.761619	0.530028	AN
ME_036	0.00394813	0.673236	0.667451	0.235563	0.439579	0.17437	0.676326	0.714705	0.112418	0.04897	0.544391	0.752081	AN
ME_037	0.0854267	0.689145	0.69604	0.725275	0.995655	0.420143	0.618153	0.0746056	0.283653	0.228366	0.669526	0.442481	CN
ME_038	0.931345	0.0533488	0.441824	0.143577	0.491626	0.374644	0.49655	0.234949	0.0402283	0.340051	0.0895619	0.0950703	CN
ME_039	0.196758	0.180039	0.789356	0.336121	0.321722	0.54293	0.415824	0.0667755	0.0415257	0.131729	0.866141	0.493321	CN
ME_040	0.829566	0.103693	0.514791	0.721612	0.161212	0.0841435	0.933715	0.613099	0.340391	0.466826	0.379728	0.228975	CN
ME_041	0.315228	0.230205	0.997413	0.902721	0.182417	0.105348	0.797192	0.745365	0.403319	0.776168	0.709409	0.136792	CN
ME_042	0.805386	0.208787	0.314624	0.189551	0.808133	0.965486	0.348537	0.120584	0.388059	0.358485	0.0832011	0.636432	CN
ME_043	0.156833	0.352211	0.339296	0.591818	0.859552	0.688759	0.966123	0.743963	0.553087	0.574453	0.142195	0.511412	CN
ME_044	0.316933	0.458968	0.206106	0.203005	0.19123	0.479669	0.310766	0.442378	0.934226	0.496723	0.0308716	0.235863	CN
ME_045	0.56487	0.225053	0.0919697	0.376053	0.810558	0.528908	0.577103	0.883817	0.656972	0.697195	0.395836	0.779937	CN
ME_046	0.438635	0.860229	0.421632	0.902538	0.171534	0.954881	0.459237	0.0389022	0.0887574	0.225515	0.526251	0.815835	CN
ME_047	0.621513	0.0878502	0.0615698	0.266505	0.974529	0.341381	0.826297	0.842912	0.750634	0.842619	0.497524	0.738278	CN
ME_048	0.774503	0.680581	0.314375	0.727378	0.12192	0.426152	0.849823	0.328319	0.103459	0.378946	0.526889	0.282667	CN
ME_049	0.18678	0.543688	0.164556	0.298141	0.497383	0.65573	0.617409	0.297992	0.810194	0.392257	0.744286	0.227797	CN
ME_050	0.67327	0.920931	0.86056	0.670485	0.703264	0.424426	0.923706	0.198595	0.823967	0.625145	0.222564	0.39673	CN
ME_051	0.0414655	0.241404	0.118717	0.287208	0.538874	0.995852	0.0795562	0.733108	0.84859	0.758358	0.691495	0.475423	CN
ME_052	0.27798	0.526724	0.964122	0.845777	0.744454	0.709997	0.850014	0.699221	0.578279	0.943263	0.0529878	0.274998	CN
ME_053	0.559546	0.332274	0.472945	0.754425	0.408552	0.2739	0.91711	0.929707	0.948468	0.588856	0.0427568	0.921119	CN
ME_054	0.299486	0.027582	0.180585	0.330132	0.174763	0.129668	0.775645	0.102973	0.34818	0.0917987	0.304594	0.902469	CN
ME_055	0.197448	0.147834	0.341704	0.547329	0.556312	0.0658194	0.706093	0.877634	0.367747	0.254439	0.684328	0.246576	CN
ME_056	0.969581	0.0250244	0.487784	0.590172	0.0511096	0.0971013	0.772295	0.0557108	0.250501	0.130606	0.957208	0.519795	CN
ME_057	0.0772659	0.0681005	0.30061	0.206594	0.194592	0.508681	0.411055	0.00584553	0.164853	0.0377918	0.841727	0.839502	CN
ME_058	0.479183	0.759866	0.864904	0.983078	0.983891	0.0143758	0.0353562	0.644573	0.600594	0.138526	0.376956	0.809064	CN
ME_059	0.892642	0.558567	0.0743327	0.631516	0.452869	0.209312	0.814497	0.494951	0.608553	0.16752	0.925561	0.653567	CP
ME_060	0.96054	0.731487	0.354937	0.493869	0.19534	0.719474	0.559858	0.832753	0.141499	0.412442	0.796894	0.364591	CP
ME_061	0.383955	0.330708	0.98156	0.957933	0.0556633	0.774112	0.0880852	0.449054	0.588813	0.833769	0.203868	0.676317	CP
ME_062	0.756869	0.845207	0.426718	0.935196	0.19606	0.753474	0.223632	0.124553	0.350794	0.0440377	0.488914	0.843414	CP
ME_063	0.160839	0.272223	0.303789	0.858201	0.0483566	0.694182	0.0498857	0.624852	0.715336	0.662455	0.418007	0.659865	CP
ME_064	0.151933	0.959006	0.242512	0.299137	0.949529	0.284509	0.231783	0.759072	0.40289	0.0495788	0.732868	0.924075	CP
ME_065	0.226315	0.218078	0.505941	0.939428	0.330841	0.800758	0.18634	0.566592	0.77902	0.823324	0.858498	0.776209	CP
ME_066	0.20706	0.104041	0.921376	0.505797	0.25633	0.686593	0.199656	0.598861	0.231538	0.173271	0.804384	0.797093	CP
ME_067	0.0945951	0.244999	0.900208	0.339674	0.17088	0.34063	0.651979	0.715669	0.481506	0.31252	0.619607	0.585646	CP
ME_068	0.947146	0.299589	0.945136	0.985076	0.809248	0.910507	0.952379	0.393351	0.396977	0.173213	0.674993	0.751306	CP
ME_069	0.208549	0.802904	0.0141645	0.0125344	0.511746	0.756842	0.629406	0.305597	0.716725	0.208085	0.209019	0.354535	CP
ME_070	0.659587	0.862375	0.602269	0.0738376	0.639713	0.896712	0.0566385	0.338697	0.424484	0.637551	0.164602	0.118868	CP
ME_071	0.720898	0.648088	0.177928	0.0500126	0.668965	0.626317	0.0522251	0.413324	0.63258	0.308507	0.1662	0.258175	CP
ME_072	0.385064	0.22676	0.505452	0.227031	0.43779	0.109872	0.0157287	0.324711	0.849611	0.838487	0.0289271	0.183803	CP
ME_073	0.140468	0.656384	0.907551	0.27196	0.0501544	0.37168	0.148224	0.750883	0.970136	0.564431	0.993286	0.870167	CP
ME_074	0.856143	0.358081	0.962409	0.910671	0.312165	0.767488	0.385711	0.535075	0.493258	0.166223	0.507598	0.920641	CP
ME_075	0.071354	0.590034	0.373348	0.057652	0.376999	0.201596	0.117631	0.393389	0.694779	0.132278	0.0812787	0.287428	CP
ME_076	0.201582	0.69019	0.596918	0.387222	0.856296	0.199565	0.474827	0.561335	0.310416	0.164415	0.806734	0.949001	VF
ME_077	0.165576	0.584884	0.970304	0.703756	0.611292	0.208001	0.167071	0.0761711	0.793349	0.896946	0.164983	0.888307	VF
ME_078	0.642629	0.204736	0.143229	0.184316	0.98258	0.236171	0.168248	0.827579	0.650438	0.893617	0.167929	0.169033	VF
ME_079	0.0756927	0.57733	0.740115	0.796875	0.0392007	0.809542	0.222351	0.751513	0.274235	0.348086	0.186455	0.761393	VF
ME_080	0.00763551	0.901577	0.264895	0.215944	0.566768	0.488336	0.303094	0.102626	0.144131	0.0964266	0.359812	0.14135	VF
ME_081	0.0694667	0.612361	0.821947	0.933126	0.0927077	0.596747	0.426071	0.0810745	0.604012	0.217728	0.0697188	0.645107	VF
ME_082	0.460489	0.521301	0.404464	0.577327	0.98519	0.589679	0.19621	0.519842	0.778233	0.762309	0.729862	0.0989683	VF
ME_083	0.248687	0.740265	0.245283	0.119997	0.555506	0.548295	0.9648	0.251651	0.133878	0.724975	0.375533	0.423418	VF
ME_084	0.100215	0.782009	0.242792	0.153972	0.0391686	0.0049873	0.424578	0.103276	0.341248	0.130315	0.952059	0.752297	VF
ME_085	0.244756	0.35716	0.134135	0.0323035	0.025921	0.191546	0.716448	0.634175	0.956498	0.438938	0.771763	0.781177	VF
ME_086	0.092493	0.507357	0.0674117	0.070288	0.0365924	0.310432	0.982157	0.58156	0.44969	0.74683	0.923553	0.195152	VF
ME_087	0.826538	0.246184	0.987818	0.683737	0.254498	0.00947081	0.0552202	0.737163	0.65877	0.746747	0.119609	0.51534	VF
ME_088	0.0183181	0.360099	0.984319	0.420242	0.455903	0.645844	0.223545	0.264837	0.425032	0.371249	0.410486	0.842139	VF
ME_089	0.0241823	0.678355	0.838682	0.414902	0.0563056	0.396655	0.626824	0.153191	0.303995	0.100215	0.888513	0.743539	VF
ME_090	0.146748	0.641257	0.630405	0.402101	0.0612154	0.367766	0.192327	0.639351	0.674879	0.164373	0.642522	0.259368	VF
ME_091	0.05359	0.494601	0.314529	0.779672	0.744895	0.232624	0.0022764	0.96561	0.98117	0.514878	0.32075	0.492501	VF
ME_092	0.367451	0.775658	0.797089	0.979738	0.272134	0.775211	0.0660586	0.833376	0.840857	0.660293	0.658593	0.125661	VF
ME_093	0.415336	0.573166	0.979986	0.635922	0.840114	0.315572	0.237024	0.189651	0.302666	0.838383	0.610984	0.341409	VF
ME_094	0.955998	0.721183	0.582144	0.675354	0.666551	0.0127401	0.105379	0.343533	0.618671	0.696442	0.893169	0.355039	VF
ME_095	0.0251127	0.92052	0.876224	0.554046	0.112879	0.252868	0.312967	0.0480368	0.110578	0.128614	0.794566	0.464239	VF
ME_096	0.0191783	0.929119	0.931271	0.972793	0.247461	0.228238	0.686766	0.0189233	0.0761564	0.100937	0.44799	0.717533	VF
ME_097	0.666348	0.706018	0.647894	0.649525	0.528095	0.418744	0.0155083	0.514336	0.738294	0.279758	0.932494	0.00451428	VF
ME_098	0.507024	0.24501	0.646514	0.941117	0.0627143	0.0920998	0.0380209	0.184609	0.807726	0.846515	0.988111	0.150184	VF
ME_099	0.177878	0.780064	0.978758	0.663748	0.317282	0.511936	0.773826	0.485501	0.544501	0.623592	0.472013	0.399182	VF
ME_100	0.389381	0.598464	0.123293	0.0476954	0.0956899	0.123336	0.262731	0.233997	0.988385	0.547928	0.278696	0.109954	VF
ME_101	0.355756	0.870713	0.113339	0.13083	0.674456	0.102504	0.166759	0.889418	0.346042	0.403713	0.134082	0.0207392	VF
ME_102	0.623661	0.441819	0.986538	0.901344	0.987971	0.0408729	0.761179	0.85207	0.712751	0.949377	0.445583	0.236167	VF
ME_103	0.122028	0.40987	0.0394665	0.0448084	0.20118	0.69289	0.52955	0.11218	0.615028	0.0723479	0.642485	0.967702	VI
ME_104	0.417666	0.12892	0.785294	0.727789	0.374485	0.0118759	0.00633334	0.567617	0.368775	0.289057	0.0661449	0.512143	VI
ME_105	0.0596433	0.729608	0.362933	0.15174	0.0567631	0.0403578	0.294736	0.458124	0.906098	0.141373	0.9918	0.151283	VI
ME_106	0.107963	0.371022	0.531259	0.954447	0.0321897	0.0197615	0.0928537	0.189386	0.852726	0.265652	0.0171699	0.282413	VI
ME_107	0.111993	0.996067	0.632679	0.468951	0.271589	0.262775	0.868531	0.380825	0.393795	0.698926	0.970448	0.609227	VI
ME_108	0.203297	0.902656	0.832021	0.646769	0.0482669	0.671021	0.444528	0.77719	0.392877	0.839337	0.272384	0.370366	VI
ME_109	0.0216372	0.539667	0.082261	0.142487	0.642171	0.715515	0.508187	0.801747	0.393201	0.500349	0.000114912	0.34212	VI
ME_110	0.468714	0.372841	0.647977	0.6046	0.886063	0.924909	0.210804	0.112872	0.611817	0.739974	0.720599	0.0221334	VI
ME_111	0.277947	0.750896	0.871567	0.612969	0.558227	0.647164	0.165172	0.709002	0.754226	0.761568	0.567549	0.717325	VI
ME_112	0.587711	0.708942	0.282761	0.171681	0.183978	0.276038	0.211132	0.689751	0.49131	0.856011	0.0862189	0.567928	VI
ME_113	0.159494	0.764942	0.345381	0.208961	0.342631	0.324492	0.66109	0.749284	0.163967	0.701811	0.516292	0.120693	VI
ME_114	0.111907	0.265798	0.0115434	0.0385393	0.618204	0.939648	0.496074	0.867802	0.182919	0.207479	0.221352	0.944297	VI
ME_115	0.991736	0.920293	0.016354	0.0153519	0.199619	0.0839545	0.259664	0.290001	0.918161	0.302664	0.0318414	0.76951	VI
ME_116	0.134952	0.630021	0.638893	0.454201	0.767464	0.110177	0.370162	0.971962	0.157954	0.100597	0.847429	0.49942	VI
ME_117	0.942835	0.719103	0.349337	0.450179	0.245855	0.773637	0.819198	0.363778	0.390884	0.718309	0.295531	0.131416	VI
ME_118	0.337486	0.58356	0.72342	0.288178	0.0940929	0.18519	0.212187	0.896842	0.560526	0.169717	0.0371015	0.402964	VI
ME_119	0.426739	0.974708	0.606348	0.592108	0.32902	0.0666363	0.892671	0.678203	0.964554	0.501788	0.682262	0.099743	VI
ME_120	0.294851	0.68705	0.112587	0.110109	0.99195	0.491867	0.485324	0.893086	0.438308	0.600156	0.0828355	0.461566	VI
ME_121	0.202982	0.711519	0.203851	0.374961	0.306087	0.187418	0.699899	0.558504	0.496674	0.341618	0.716125	0.420258	VI
ME_122	0.69456	0.594477	0.177657	0.405659	0.268276	0.6529	0.516946	0.473721	0.6925	0.821729	0.0231085	0.11077	VI
ME_123	0.199277	0.668393	0.564829	0.648505	0.926665	0.609243	0.288867	0.663688	0.327614	0.207857	0.00343273	0.602483	VI
ME_124	0.0476618	0.957479	0.403593	0.237276	0.17707	0.0848752	0.966132	0.342189	0.607125	0.0817545	0.156319	0.187037	VI
ME_125	0.4706	0.455436	0.900352	0.815374	0.699112	0.70732	0.801487	0.498412	0.921212	0.759042	0.0887374	0.679772	VI
ME_126	0.740004	0.901677	0.739291	0.729227	0.389586	0.168177	0.279414	0.710725	0.597873	0.358087	0.749576	0.82942	VM
ME_127	0.0675685	0.905031	0.860968	0.868107	0.456578	0.989006	0.990344	0.0584015	0.347705	0.120078	0.163106	0.854451	VM
ME_128	0.175752	0.638731	0.314059	0.0755893	0.0282084	3.15e-05	0.0996806	0.244694	0.268001	0.120537	0.628841	0.658391	VM
ME_129	0.220272	0.721918	0.521025	0.680997	0.924921	0.135089	0.0396087	0.683421	0.605487	0.254741	0.333543	0.374528	VM
ME_130	0.668902	0.822259	0.399898	0.784457	0.595376	0.0923867	0.275853	0.376285	0.619225	0.629861	0.554385	0.165916	VM
ME_131	0.428602	0.347882	0.189051	0.687521	0.362011	0.563587	0.414207	0.776301	0.348793	0.102357	0.561332	0.745052	VM
ME_132	0.900875	0.122891	0.340173	0.576092	0.0551463	0.0061275	0.843126	0.801309	0.718866	0.228233	0.680019	0.755601	VM
ME_133	0.463852	0.292577	0.216695	0.179368	0.0597074	0.000436163	0.24794	0.459628	0.735516	0.509531	0.653774	0.500442	VM
ME_134	0.193773	0.92758	0.890186	0.362461	0.57418	0.0203806	0.0454088	0.623592	0.849902	0.402942	0.311683	0.245001	VM
ME_135	0.261807	0.999181	0.265902	0.175673	0.809683	0.155152	0.374371	0.946873	0.160873	0.362229	0.482038	0.175608	VM
ME_136	0.932356	0.657775	0.170629	0.368885	0.589461	0.390103	0.987595	0.448074	0.00903361	0.0283638	0.807979	0.0956047	VM

## Sheet: g
supplementary file 1g. The R values of the Module-Trait correlations in the male-infant placentas.
	Population	BW	BPD	FL	GT	PW	PLV	AG	AFMD	AFI	FH	FUH	Layers
ME_001	-0.104545	0.10962	-0.0348638	0.143645	0.0885807	0.0655267	0.271692	-0.0225289	0.273966	-0.0468486	0.115273	-0.0739647	UC
ME_002	-0.0598978	0.153237	0.116382	0.107522	0.1355	-0.0602662	-0.241063	0.0252873	-0.0636647	-0.0389725	-0.00529649	0.266981	UC
ME_003	0.260332	-0.0711844	-0.186191	-0.132085	0.184285	-0.266351	-0.156638	0.0927266	-0.0397219	-0.154317	-0.0847973	-0.113556	UC
ME_004	0.42908	0.389161	0.10916	0.197182	0.0835462	0.0968147	0.173732	0.0833511	0.0979196	-0.0465135	-0.255006	0.0923022	UC
ME_005	0.293154	0.333992	0.11521	0.124754	0.220614	-0.0551364	0.217265	0.111056	-0.313879	-0.238304	0.0729517	-0.0108129	UC
ME_006	0.212914	0.25383	0.0184405	0.0113306	0.00367292	-0.164394	0.0464361	0.225135	-0.275684	-0.142528	0.112609	-0.0451337	UC
ME_007	0.117704	-0.180847	-0.237873	-0.309993	-0.232566	0.298898	0.207168	-0.137932	0.0428684	0.0265365	-0.0486819	-0.150574	UC
ME_008	-0.54046	-0.449631	-0.0871788	-0.115026	-0.114238	-0.0742403	-0.3415	-0.143961	0.111738	0.232438	0.145612	0.0464197	UC
ME_009	-0.423214	-0.465023	-0.19755	-0.280772	-0.113539	-0.290239	-0.356701	-0.0619447	-0.137395	0.0898448	0.170651	-0.0664962	UC
ME_010	-0.143496	-0.290102	-0.125489	-0.228123	-0.00541146	-0.174735	-0.0546835	-0.128819	-0.261832	-0.118874	0.275935	-0.118681	UC
ME_011	0.0580962	0.0889223	0.0269034	-0.0770392	0.0983193	-0.0487461	0.154485	0.0779526	-0.338991	-0.182103	0.149328	-0.113731	UC
ME_012	-0.0697503	-0.0459342	-0.0542306	-0.072728	-0.170753	-0.312801	-0.251753	0.258746	-0.100722	0.126231	0.407509	0.145546	UC
ME_013	-0.238424	-0.264894	-0.0419714	-0.0647371	-0.334986	-0.336818	-0.32695	0.241966	0.206026	0.33256	0.404889	0.254845	UC
ME_014	-0.309227	-0.316379	-0.122449	-0.192707	-0.231291	0.116738	-0.189206	-0.119073	0.165291	0.206704	-0.059403	-0.0432804	UC
ME_015	0.306422	-0.119972	-0.373636	-0.274593	0.169577	-0.166096	0.0645992	-0.17199	-0.297736	-0.438927	-0.132074	-0.346867	AN
ME_016	0.382286	-0.028675	-0.174626	-0.100555	-0.133827	-0.203436	-0.0987771	-0.138096	-0.386433	-0.447828	-0.0165363	-0.203059	AN
ME_017	0.115327	-0.0976234	-0.179764	-0.242016	-0.385409	-0.163526	-0.0288216	0.0144135	-0.140969	-0.128552	-0.0542148	-0.36211	AN
ME_018	-0.351434	-0.252559	-0.0930112	-0.216482	-0.0440684	-0.0852793	-0.0525833	-0.0582664	-0.047207	-0.0854299	-0.12408	-0.398587	AN
ME_019	-0.162234	-0.277278	-0.341391	-0.414928	-0.0541605	-0.219539	-0.331819	-0.234593	-0.281774	-0.319053	-0.124163	-0.366987	AN
ME_020	0.0719011	-0.152698	-0.252073	-0.239722	0.15181	-0.262448	-0.095723	-0.121101	-0.373229	-0.326528	0.0557145	-0.226653	AN
ME_021	-0.310009	-0.0531148	-0.116634	-0.228331	-0.346051	0.106764	-0.0594549	0.0414894	0.216585	0.179754	-0.172825	-0.031017	AN
ME_022	-0.190137	-0.144364	-0.277151	-0.329927	-0.353611	0.181428	-0.0977715	-0.0181563	0.0341936	0.0839707	-0.286809	0.116743	AN
ME_023	-0.00722355	-0.00730018	-0.153436	-0.142572	-0.205729	-0.0310757	-0.151345	0.0807741	0.0607237	0.245856	-0.0850988	0.217751	AN
ME_024	-0.0182706	0.008627	0.0640077	0.120635	0.0364135	-0.128721	-0.19992	-0.109452	0.181867	0.29918	-0.148721	0.18682	AN
ME_025	-0.218991	-0.179742	-0.169956	-0.244906	-0.118763	0.102529	-0.146081	-0.246623	0.0263835	-0.0128404	-0.389102	-0.11354	AN
ME_026	-0.0573392	0.205618	0.117315	0.218767	0.182913	0.133362	0.134915	-0.0568376	0.0969244	-0.0391411	-0.249024	0.139097	AN
ME_027	-0.117524	-0.152824	-0.220284	-0.254706	-0.361488	0.150826	-0.131956	-0.173579	-0.0531471	-0.16343	-0.267979	-0.0133562	AN
ME_028	-0.493326	0.0337407	0.0106516	-0.0477486	-0.0654551	0.155599	-0.163264	-0.0811087	0.21808	0.229885	-0.102971	0.135774	AN
ME_029	0.235969	0.139568	0.172873	0.204581	-0.0208321	-0.0320602	0.0521321	0.17626	0.201577	0.266008	0.185238	0.254006	AN
ME_030	0.301589	-0.0123329	0.0394149	0.0402822	-0.297364	-0.105598	-0.0674073	0.184499	0.125761	0.111108	0.11634	0.0880176	AN
ME_031	0.508743	0.234961	-0.0539377	0.120114	0.0877112	-0.0495396	-0.00719594	-0.172996	-0.375064	-0.378555	0.0552406	0.141704	AN
ME_032	0.175876	0.276646	0.178889	0.304864	0.341659	0.112734	0.132349	-0.0249151	-0.0136316	0.0432002	0.137261	0.360962	AN
ME_033	0.226953	0.184775	0.304906	0.379709	0.496016	-0.0510203	0.173436	0.0832532	-0.0161877	0.0700125	0.286434	0.150045	AN
ME_034	0.0617277	0.170557	0.110632	0.213047	0.470409	0.0325736	0.119804	-0.12055	-0.203228	-0.175929	0.0727072	0.0997065	AN
ME_035	-0.297529	0.0399085	0.193516	0.18114	0.404378	0.158477	0.152947	0.0271408	0.158703	0.219436	0.0540071	0.11153	AN
ME_036	-0.481377	-0.075027	-0.0764351	-0.208984	-0.137051	0.238489	-0.0742767	0.0650572	0.277242	0.340232	-0.107685	0.0562363	AN
ME_037	0.286642	0.0680205	0.0664352	-0.0597725	-0.000927035	0.1366	0.0847078	-0.296648	-0.181012	-0.202928	0.0725631	0.13019	CN
ME_038	0.0146661	-0.320204	-0.130376	-0.245177	0.116679	-0.150281	0.115365	-0.200144	-0.338828	-0.161354	0.283077	-0.27852	CN
ME_039	0.217123	-0.225286	-0.0454561	-0.162655	0.167501	-0.103296	0.137861	-0.304621	-0.336785	-0.252433	-0.0286906	-0.116226	CN
ME_040	-0.0366337	-0.271777	-0.110554	-0.0606024	0.235151	-0.287775	0.0141586	-0.0859242	-0.161242	-0.123403	-0.148707	-0.202668	CN
ME_041	-0.169732	-0.202145	-0.000551902	0.0208057	0.224093	-0.270532	-0.0437283	-0.055245	-0.141554	-0.0483744	0.0633768	-0.249276	CN
ME_042	-0.0419262	0.211547	0.169941	0.220579	-0.0413232	-0.00736634	-0.158577	0.259714	0.146152	0.155374	-0.288616	0.0803421	CN
ME_043	0.237563	0.157388	0.161604	0.0910943	0.0301165	0.0681095	0.00723035	-0.0555598	-0.10072	-0.0953735	-0.246001	0.111439	CN
ME_044	0.169143	0.125572	0.21277	0.214199	0.219766	-0.119898	-0.171281	-0.130219	0.0140493	-0.115319	-0.355412	0.199762	CN
ME_045	0.09776	-0.20435	-0.281059	-0.149844	-0.0407912	-0.106889	0.0947167	0.024874	0.0754961	-0.0661703	-0.143796	0.0475389	CN
ME_046	-0.13128	0.0299701	-0.136166	0.020845	-0.229646	-0.00963173	-0.125497	0.340973	0.28376	0.204151	-0.107575	0.0396348	CN
ME_047	-0.0839013	-0.284537	-0.310339	-0.187481	0.00543563	-0.160916	0.0373472	-0.0337272	0.054064	-0.0337911	0.115106	-0.0568379	CN
ME_048	-0.0487436	0.0699975	-0.170027	-0.0592967	-0.258815	0.134857	-0.032226	0.165265	0.271954	0.148948	0.107411	0.181377	CN
ME_049	0.221933	-0.103103	-0.23334	-0.175742	-0.115143	0.0757873	0.0848866	-0.175795	0.040871	-0.144877	0.0554874	0.203171	CN
ME_050	0.0716924	0.0168973	-0.0298984	-0.07234	-0.0647802	0.135356	0.0163025	-0.216257	0.037856	-0.0830317	0.205427	0.143527	CN
ME_051	0.336878	0.197465	-0.260982	-0.179703	-0.10433	-0.000885036	0.291939	-0.0580028	-0.0324938	-0.052337	0.0674795	0.121051	CN
ME_052	-0.183123	-0.107453	0.00765761	-0.0331047	0.0554495	-0.0632428	0.0321847	-0.0657057	-0.0944257	0.0121155	0.320664	-0.184244	CN
ME_053	-0.0990941	0.163937	0.121727	0.0532157	-0.140001	0.184659	0.0177165	0.0150167	0.0110026	0.0918201	0.334892	0.016857	CN
ME_054	-0.175261	0.362233	0.225011	0.164655	-0.227973	0.253743	-0.0484902	0.272323	0.158693	0.281201	0.173447	0.0208598	CN
ME_055	-0.216797	0.242678	0.16081	0.102178	-0.0999071	0.305644	-0.0641337	0.0262077	0.152439	0.192198	-0.0691315	0.195353	CN
ME_056	-0.00649192	0.368016	0.117709	0.0914975	-0.3231	0.276891	-0.0492337	0.317252	0.19377	0.253145	-0.00913466	0.109249	CN
ME_057	-0.294088	0.303222	0.17486	0.212547	-0.218152	0.112156	-0.139262	0.444506	0.233181	0.342816	0.0339851	-0.034469	CN
ME_058	-0.12003	0.0520004	-0.0289582	0.00361077	0.00343738	0.399218	0.347016	0.0784141	0.0889527	0.248214	0.149564	0.0411188	CN
ME_059	-0.0236691	0.102335	0.305483	0.0839725	-0.131093	0.21756	0.0411367	-0.119275	-0.0896487	-0.238579	0.0163868	0.0786001	CP
ME_060	-0.00867791	0.0601341	0.161191	0.119572	-0.224229	-0.0629349	-0.102001	0.0370271	0.253642	0.143018	-0.0451197	0.158025	CP
ME_061	-0.151822	-0.169374	0.00405404	0.0092518	-0.3264	0.0503084	-0.292575	-0.132193	0.0946011	-0.0367989	0.220121	0.0731308	CP
ME_062	-0.0542632	0.0342348	0.138736	-0.014261	-0.223878	0.0550449	-0.211036	-0.264579	-0.162565	-0.34245	0.120937	-0.0346364	CP
ME_063	-0.242275	-0.190807	0.178912	0.0313303	-0.336131	0.0688832	-0.334002	-0.0856107	0.0639032	-0.0764549	0.141339	0.0770789	CP
ME_064	0.247378	-0.00901555	0.202856	0.180613	0.0111022	-0.186076	-0.20745	-0.0537566	-0.14593	-0.334425	0.059813	0.016715	CP
ME_065	-0.209846	-0.213531	0.116275	-0.013328	-0.169328	0.0442437	-0.228704	0.100265	0.049187	0.0391472	0.0312641	0.0498291	CP
ME_066	-0.218614	-0.279415	-0.0173109	-0.116314	-0.197138	0.0706828	-0.222135	0.0920713	0.207556	0.235481	-0.0434224	0.0450745	CP
ME_067	0.287002	0.201811	-0.0219924	0.166304	0.23676	-0.16598	0.0789845	-0.0638251	-0.122992	-0.175762	0.0869053	0.0954023	CP
ME_068	0.0116272	0.180447	-0.0120699	0.00328094	-0.0423223	-0.0197129	0.0104745	-0.148878	-0.147753	-0.235512	0.073447	-0.0555447	CP
ME_069	-0.217916	0.0437575	-0.411059	-0.417702	-0.114704	0.0542694	0.0844904	0.178255	0.063578	0.218133	-0.217696	-0.161324	CP
ME_070	-0.0771459	-0.030399	-0.0912175	-0.305981	0.0819668	0.0227668	0.32518	-0.166636	-0.139401	-0.0824949	-0.24018	-0.268495	CP
ME_071	-0.0626021	0.0799282	-0.233025	-0.333827	0.0748905	0.08525	0.330843	0.142751	-0.0837114	0.177203	-0.239301	-0.196389	CP
ME_072	0.151472	-0.20965	0.116408	0.20953	0.13547	-0.274989	-0.405264	-0.171455	0.0332493	-0.0357404	0.369486	0.229992	CP
ME_073	0.254278	0.0779189	0.0203668	0.190909	0.333633	-0.155732	0.249567	0.0556423	-0.0065665	0.100821	0.00147604	0.0286628	CP
ME_074	0.0317898	-0.160154	-0.00826666	0.0196768	0.175889	-0.0518246	0.151268	0.108475	0.11974	0.239288	-0.115825	-0.0174733	CP
ME_075	-0.30852	0.0942928	-0.155196	-0.323929	-0.154029	0.221203	0.269366	0.148866	0.0687418	0.259464	-0.298752	-0.184972	CP
ME_076	0.228159	0.0720757	0.0955314	0.155599	-0.0327794	-0.229156	-0.128852	0.104879	-0.182115	-0.247794	-0.0442728	-0.0115804	VF
ME_077	-0.247135	-0.0986641	0.00674029	0.0687671	-0.0918248	-0.22503	-0.246292	0.31296	-0.0474043	-0.0234477	0.247471	-0.0254251	VF
ME_078	0.0838678	0.226613	0.260448	0.236931	0.00395339	-0.212035	-0.245632	0.0394208	-0.0819095	-0.0242093	0.24581	0.245193	VF
ME_079	-0.313445	-0.100645	-0.0600033	-0.0465781	-0.360685	-0.0436175	-0.21827	0.0572843	0.196034	0.168668	0.235814	0.0549374	VF
ME_080	-0.45611	0.0223886	0.199818	0.221251	-0.103435	-0.124973	-0.184845	0.289181	0.259883	0.29429	0.164664	0.261634	VF
ME_081	-0.319987	0.0915506	0.0407289	0.0151922	-0.297476	0.0955757	-0.143364	0.308119	0.0936974	0.220415	0.319713	0.0832454	VF
ME_082	-0.133033	-0.11573	0.150087	-0.100646	-0.00336094	0.0974127	0.23083	-0.116132	0.0509572	0.0547203	-0.0624602	-0.292166	VF
ME_083	0.206597	-0.0599675	-0.208057	-0.276008	-0.106436	0.108372	-0.00799024	-0.205336	-0.26647	-0.0636352	-0.159417	-0.144179	VF
ME_084	-0.291139	-0.050068	-0.209135	-0.253874	-0.36074	0.477167	0.143822	0.288659	0.17104	0.268845	0.0108852	-0.0570979	VF
ME_085	-0.208285	-0.165563	-0.266301	-0.373436	-0.387395	0.233191	-0.0656913	0.0859987	-0.00987624	0.139451	-0.0524835	-0.0502637	VF
ME_086	-0.297663	-0.119603	-0.322246	-0.319098	-0.365275	0.182109	-0.00404929	0.0995346	0.136228	0.0584	-0.017373	-0.231362	VF
ME_087	0.0396625	0.207669	-0.00276447	0.0736576	-0.204133	0.444947	0.336892	0.0607097	0.07983	0.0584198	-0.276286	0.117379	VF
ME_088	-0.408333	-0.164567	0.00355863	0.145159	-0.134385	-0.0830605	-0.217722	0.199842	0.143683	0.160834	0.148193	0.0360476	VF
ME_089	0.391684	0.0749809	0.0368475	0.146815	0.33549	-0.152566	0.0878607	-0.254341	-0.184507	-0.291139	0.0253779	-0.0591851	VF
ME_090	0.258256	0.0842129	0.0869525	0.150834	0.329403	-0.161993	0.232793	-0.0846928	-0.0758377	-0.247818	-0.0838947	-0.202098	VF
ME_091	0.339039	0.123193	-0.1806	-0.0506182	-0.0588614	0.213612	0.512822	-0.0078063	0.00427331	-0.117507	-0.17833	-0.123788	VF
ME_092	0.162098	0.0515641	-0.0465281	-0.00459851	0.196878	0.0516696	0.323764	-0.0380763	0.0363441	-0.079451	-0.0798741	-0.272022	VF
ME_093	-0.14668	0.101742	0.00454208	0.0855574	-0.0365161	0.180217	0.211659	0.234161	0.185006	0.0369167	0.0919038	-0.170984	VF
ME_094	0.00998982	-0.0645486	0.0993816	0.0757205	0.077897	-0.428965	-0.286987	-0.170244	-0.0899364	-0.0705481	-0.0243119	0.166284	VF
ME_095	0.389359	0.0180644	0.0281957	0.106827	0.281221	-0.204821	-0.181174	-0.346767	-0.282958	-0.269997	0.047119	0.131933	VF
ME_096	0.405637	-0.0161048	0.0156147	-0.00617511	0.207121	-0.215583	-0.0729143	-0.406425	-0.312975	-0.290549	-0.136735	-0.0654292	VF
ME_097	-0.0779473	-0.0682175	0.0825464	0.0821379	0.113861	-0.145622	-0.417946	-0.117658	0.0604388	0.193836	-0.0153362	0.481912	VF
ME_098	0.119696	-0.208175	-0.0828923	-0.0133736	0.327621	-0.298006	-0.36273	-0.236778	-0.0440413	-0.0350363	0.00269799	0.256153	VF
ME_099	0.240351	0.0505257	0.00482075	0.0785923	0.179592	0.118325	-0.0519964	-0.125782	-0.109396	-0.0886822	0.129668	0.151761	VF
ME_100	0.154901	0.0951308	0.273672	0.347265	0.294914	-0.273642	-0.200707	-0.212999	-0.00263583	-0.108471	0.194257	0.283434	VF
ME_101	-0.16604	0.0294616	0.280877	0.268499	0.075942	-0.289279	-0.246467	0.0251707	0.169374	0.150324	0.266335	0.40099	VF
ME_102	0.0886647	0.138583	0.00305508	0.0224419	0.00272984	0.35787	-0.0549881	-0.0337539	-0.0665854	0.0114949	0.137454	0.212037	VF
ME_103	-0.274563	-0.148386	-0.360231	-0.351593	-0.228357	0.0714152	-0.113462	0.281746	0.0908676	0.316905	-0.083904	0.00733107	VI
ME_104	0.145956	0.269789	-0.0492954	-0.0629584	-0.159763	0.432818	0.465514	0.10321	0.161656	0.190198	-0.323666	0.118267	VI
ME_105	-0.331308	-0.0625212	-0.163612	-0.255212	-0.334905	0.358727	0.188013	0.13373	0.0213556	0.26162	-0.00186079	-0.255487	VI
ME_106	-0.284967	0.160909	0.112994	0.0103425	-0.373665	0.403865	0.297349	0.234298	0.0336025	0.199508	0.412101	-0.19279	VI
ME_107	-0.281886	0.000892589	-0.0863767	-0.130558	-0.197098	-0.200689	0.029963	0.15768	0.153481	0.0699425	-0.00670756	-0.092355	VI
ME_108	-0.227316	0.022142	-0.0383905	-0.0828283	-0.346433	0.0767905	0.13777	-0.051203	0.153776	0.0366959	0.196778	-0.161127	VI
ME_109	-0.398446	0.110704	0.306982	0.260915	-0.083983	0.0659169	-0.119371	0.0454382	0.153672	0.121569	0.62106	-0.170736	VI
ME_110	-0.130627	-0.160306	0.0825257	-0.0935457	0.0259392	0.017064	0.223686	-0.281226	-0.0916902	-0.060037	0.0646894	-0.397078	VI
ME_111	0.194554	0.0574312	0.0292653	0.0913947	0.105708	0.0827294	-0.247364	-0.0674935	-0.056639	-0.0548959	-0.103228	0.0654795	VI
ME_112	0.0979258	0.0675081	0.192653	0.243725	0.237109	-0.195314	-0.223529	-0.0721831	0.124126	-0.032845	0.303277	0.103128	VI
ME_113	0.250623	0.0540966	0.169603	0.224569	0.170558	-0.176978	-0.0792527	-0.057815	0.248049	0.06924	-0.117115	0.275511	VI
ME_114	0.281951	0.199448	0.434363	0.361825	0.0900555	-0.0137078	0.122776	-0.0301306	-0.237666	-0.225283	0.218731	-0.0126501	VI
ME_115	-0.00187538	0.0181161	0.414909	0.418522	0.229129	-0.30538	-0.201975	-0.189833	-0.0186024	-0.185007	0.374367	-0.0530158	VI
ME_116	0.265763	0.0870497	0.084808	0.134889	0.0534997	-0.283264	-0.161195	0.00636382	-0.251522	-0.290827	-0.0348252	-0.121831	VI
ME_117	0.0129827	0.0650503	-0.168237	-0.136083	-0.207811	0.052041	0.0413682	0.163328	-0.154417	-0.0652419	-0.187709	-0.268106	VI
ME_118	0.172357	0.0990107	0.0640094	0.190539	0.296278	-0.236474	-0.223026	-0.0234713	-0.105095	-0.244812	0.364359	0.150561	VI
ME_119	0.143159	0.0057403	0.0930955	0.0967802	0.175356	-0.323113	-0.0244257	-0.0750183	-0.00804601	-0.121164	0.0740199	0.291527	VI
ME_120	0.187969	-0.0728447	-0.281439	-0.283316	0.00182669	-0.123968	0.125833	-0.0243309	-0.139641	-0.0946931	-0.306435	0.132717	VI
ME_121	0.227471	-0.0668837	-0.227045	-0.159606	0.183725	-0.235314	-0.0697055	-0.105634	-0.122606	-0.170911	-0.0657693	0.145153	VI
ME_122	0.0710075	-0.0961646	-0.240469	-0.14971	0.198439	-0.0812939	-0.116933	-0.129173	0.0715107	-0.0407795	-0.394462	0.282812	VI
ME_123	0.229299	-0.0774407	-0.10395	-0.0823934	0.0166639	-0.092351	0.190272	-0.0786073	-0.175858	-0.2251	-0.49462	0.094092	VI
ME_124	0.347314	0.00965342	0.150362	0.211547	0.240785	-0.30452	0.00768763	-0.170712	-0.0928954	-0.307466	-0.252482	0.235512	VI
ME_125	0.130078	-0.134523	0.0226688	0.0422582	0.0698971	0.0679016	-0.0454988	-0.122115	-0.0179067	-0.0554951	-0.300987	0.0746321	VI
ME_126	-0.0590713	-0.0220082	-0.0592389	0.061613	0.152387	-0.24186	-0.190928	-0.0660054	-0.0937665	-0.162641	-0.0568233	0.0383702	VM
ME_127	0.317192	-0.0212539	0.0311963	0.0295799	0.132058	0.00245508	-0.00215607	-0.327818	-0.166137	-0.271705	-0.244688	-0.0326738	VM
ME_128	-0.237748	0.0834965	-0.177927	-0.308785	-0.376447	0.650232	0.287115	0.205051	0.195436	0.271381	-0.0859569	-0.0786498	VM
ME_129	-0.215808	-0.0633437	0.113965	-0.073145	-0.0167882	0.261574	0.354614	0.0725588	0.0918308	0.200835	-0.17101	-0.157225	VM
ME_130	-0.0760817	0.0400065	0.149137	-0.0487013	0.0944036	0.293206	0.192321	-0.156655	-0.0883642	-0.0857023	-0.105038	-0.243113	VM
ME_131	0.140331	0.166077	-0.230823	-0.0715688	-0.161335	0.10262	-0.144704	-0.0505911	-0.165768	-0.284965	0.103211	0.0578847	VM
ME_132	-0.0221884	-0.269737	0.168713	0.099364	0.33191	-0.460543	-0.0352468	-0.0448128	0.0640681	0.212217	-0.0733816	-0.0554126	VM
ME_133	0.129952	-0.185873	0.217451	0.23583	0.326228	-0.569744	-0.203677	-0.131173	0.0601285	0.117105	0.079783	0.119613	VM
ME_134	0.228446	0.0161922	-0.0245951	0.161186	0.0998598	-0.39614	-0.345419	-0.0872689	-0.0337067	-0.148186	0.178789	0.204921	VM
ME_135	0.197936	-0.000182899	0.196279	0.23779	0.0428881	-0.249252	-0.157277	-0.0118714	0.245953	0.161263	0.124763	0.237825	VM
ME_136	-0.0151218	0.0788009	0.240515	0.159068	-0.0959176	0.152223	0.00277003	0.134543	0.441026	0.376104	0.0432794	0.290475	VM

## Sheet: h
supplementary file 1h. The P values of the Module-Trait correlations in the female-infant placentas.
	Population	BW	BPD	FL	GT	PW	PLV	AG	AFMD	AFI	FH	FUH	Layers
ME_001	0.344752	0.501654	0.384008	0.123567	0.995284	0.905019	0.179248	0.00298308	0.396123	0.519823	0.491558	0.0886086	UC
ME_002	0.544199	0.131316	0.0343937	0.00771881	0.257075	0.974596	0.617062	0.039254	0.313328	0.771225	0.289029	0.849494	UC
ME_003	0.215945	0.114333	0.114939	0.0274263	0.747192	0.799939	0.322581	0.346619	0.0812868	0.732646	0.624166	0.501066	UC
ME_004	0.891376	0.536043	0.937043	0.7665	0.234598	0.926614	0.692961	0.33492	0.950827	0.737434	0.582895	0.418	UC
ME_005	0.44179	0.518639	0.361141	0.850664	0.111838	0.82996	0.0434112	0.116394	0.381337	0.18914	0.482734	0.0381833	UC
ME_006	0.581913	0.133491	0.288804	0.67654	0.0411472	0.855498	0.160179	0.604533	0.623901	0.550462	0.892007	0.314616	UC
ME_007	0.965304	0.95435	0.314916	0.0556622	0.790115	0.957844	0.129149	0.0440668	0.291761	0.87899	0.547005	0.338171	UC
ME_008	0.0720364	0.01881	0.0162156	0.0306796	0.0540668	0.696845	0.950827	0.808166	0.457548	0.258656	0.631646	0.105305	UC
ME_009	0.0635414	0.0474051	0.00726994	0.00586036	0.42205	0.989665	0.770428	0.946996	0.441003	0.729025	0.0966912	0.171026	UC
ME_010	0.544829	0.761131	0.439156	0.95112	0.202935	0.368132	0.602558	0.986453	0.171184	0.0988525	0.871898	0.682223	UC
ME_011	0.604242	0.888172	0.580139	0.665003	0.399332	0.532703	0.777274	0.387074	0.659591	0.367017	0.809742	0.559301	UC
ME_012	0.674558	0.918442	0.544419	0.423514	0.980992	0.0903325	0.791213	0.545118	0.262204	0.13556	0.0131808	0.389395	UC
ME_013	0.328668	0.980963	0.336644	0.164738	0.0472602	0.789871	0.903873	0.0246165	0.919945	0.450326	0.286078	0.245083	UC
ME_014	0.39528	0.126773	0.00517866	0.00142795	0.00194316	0.450003	0.986855	0.0876771	0.639053	0.419275	0.304383	0.580953	UC
ME_015	0.575436	0.157449	0.206764	0.404328	0.272353	0.531043	0.13547	0.288153	0.091201	0.406767	0.336707	0.934587	UC
ME_016	0.868919	0.356275	0.980081	0.812606	0.744957	0.361591	0.297217	0.936477	0.171944	0.220891	0.952169	0.996638	UC
ME_017	0.571756	0.0538849	0.0798388	0.0473548	0.040016	0.939362	0.557301	0.562855	0.350773	0.813764	0.760533	0.413872	UC
ME_018	0.470277	0.909603	0.870702	0.984885	0.940469	0.320703	0.526828	0.125878	0.378952	0.227644	0.796987	0.0508437	UC
ME_019	0.39516	0.743066	0.530786	0.987003	0.204091	0.259127	0.949222	0.301325	0.388123	0.253371	0.862888	0.163593	UC
ME_020	0.73607	0.379553	0.160551	0.244141	0.0539267	0.991226	0.869302	0.375078	0.927717	0.582359	0.626443	0.851783	UC
ME_021	0.218375	0.589171	0.579439	0.381089	0.44594	0.552495	0.757458	0.800973	0.755004	0.656404	0.622386	0.175359	UC
ME_022	0.992143	0.947679	0.743886	0.675723	0.476143	0.78843	0.429084	0.779501	0.365681	0.78828	0.88872	0.572143	UC
ME_023	0.406534	0.703385	0.457127	0.988976	0.624137	0.567686	0.03268	0.212831	0.303104	0.528328	0.226419	0.0513087	UC
ME_024	0.755574	0.919207	0.797867	0.894478	0.774785	0.678305	0.190666	0.745045	0.211571	0.902278	0.831625	0.896683	UC
ME_025	0.311491	0.419247	0.530616	0.259117	0.240464	0.594612	0.434966	0.627157	0.0460099	0.3949	0.46252	0.819971	UC
ME_026	0.601447	0.357479	0.116024	0.363735	0.0136783	0.46949	0.155058	0.647561	0.149654	0.107124	0.662097	0.209077	UC
ME_027	0.89476	0.96658	0.691717	0.99124	0.313662	0.173368	0.11981	0.202877	0.0133521	0.0947137	0.960678	0.103526	UC
ME_028	0.607416	0.846821	0.548454	0.439723	0.584993	0.55017	0.253413	0.716778	0.134888	0.164287	0.272639	0.393975	UC
ME_029	0.0156765	0.300541	0.277721	0.684211	0.347446	0.859944	0.90659	0.512248	0.403	0.140752	0.903486	0.890503	UC
ME_030	0.672435	0.677517	0.737027	0.485385	0.998406	0.733159	0.259961	0.21081	0.362892	0.256383	0.646373	0.479535	UC
ME_031	0.0295483	0.794004	0.617362	0.863504	0.333412	0.787099	0.820278	0.163999	0.398797	0.0905392	0.318484	0.184694	UC
ME_032	0.49308	0.142733	0.136252	0.110985	0.496419	0.635412	0.538218	0.00487058	0.303486	0.507688	0.226557	0.0891114	UC
ME_033	0.0134975	0.127106	0.300788	0.346307	0.523576	0.547478	0.919171	0.521694	0.20126	0.511769	0.883521	0.127693	UC
ME_034	0.0320666	0.0994701	0.485527	0.899514	0.845233	0.335731	0.973675	0.146345	0.438193	0.365213	0.963716	0.0264921	UC
ME_035	0.578369	0.257475	0.0872826	0.03976	0.262588	0.739737	0.789167	0.128108	0.568729	0.535524	0.545171	0.753835	UC
ME_036	0.964109	0.0860967	0.00393269	0.00517258	0.271968	0.0472432	0.345861	0.12046	0.439499	0.824418	0.422288	0.0552923	AN
ME_037	0.91904	0.889093	0.75304	0.991502	0.37911	0.590029	0.927257	0.0448412	0.0291778	0.998778	0.217583	0.0162129	AN
ME_038	0.952962	0.191258	0.0479955	0.0555498	0.625176	0.621843	0.0690176	0.995092	0.169183	0.947786	0.0589359	0.203823	AN
ME_039	0.840696	0.0757869	0.000921978	0.000274236	1.76e-06	0.645276	0.764106	0.641374	0.619685	0.204915	0.555844	0.935355	AN
ME_040	0.791075	0.196146	0.0306688	0.00740569	0.00812968	0.993028	0.494917	0.198052	0.498302	0.12862	0.151067	0.368514	AN
ME_041	0.899006	0.0330614	0.000918799	0.000400791	0.00907638	0.455216	0.512485	0.970789	0.320896	0.231076	0.143356	0.496195	AN
ME_042	0.637715	0.0405263	0.0659867	0.0357279	0.00654085	0.245977	0.857871	0.275157	0.910115	0.652701	0.646349	0.550333	AN
ME_043	0.806237	0.460682	0.320271	0.255745	0.988845	0.468497	0.206337	0.961156	0.0251702	0.10021	0.0774295	0.452354	AN
ME_044	0.722075	0.532381	0.935427	0.961398	0.489465	0.780175	0.409731	0.724222	0.00107971	0.145048	0.0373401	0.514475	AN
ME_045	0.0494167	0.774379	0.398709	0.332534	0.22045	0.388004	0.783154	0.610299	0.0191748	0.10317	0.0121187	0.518235	AN
ME_046	0.847647	0.431526	0.205408	0.0995746	0.191391	0.148748	0.17842	0.718666	0.00243056	0.191615	0.110755	0.519152	AN
ME_047	0.660818	0.0786983	0.000337167	0.000141554	0.000865994	0.231079	0.532973	0.573306	0.544002	0.401012	0.78361	0.390634	AN
ME_048	0.893638	0.207403	0.0278808	0.0153346	0.000751445	0.618354	0.781358	0.880123	0.0125206	0.785031	0.400161	0.712102	AN
ME_049	0.677405	0.229201	0.343856	0.160739	0.00581673	0.968115	0.693451	0.257382	0.661603	0.260312	0.584427	0.169051	AN
ME_050	0.993637	0.827006	0.553194	0.330885	0.147991	0.384855	0.801593	0.0080962	0.739238	0.182554	0.629524	0.0262115	AN
ME_051	0.802769	0.566173	0.193468	0.30803	0.878582	0.439312	0.578379	0.12481	0.201282	0.905886	0.735467	0.0481401	AN
ME_052	0.466387	0.998549	0.310426	0.315419	0.547297	0.572039	0.327076	0.0630072	0.997042	0.226717	0.879485	0.705896	AN
ME_053	0.968302	0.15848	0.638812	0.611635	0.86479	0.268445	0.65714	0.1186	0.641332	0.72316	0.764959	0.322811	AN
ME_054	0.598814	0.957983	0.0705201	0.0614002	0.0332338	0.789386	0.438953	0.442235	0.970938	0.300093	0.169125	0.914908	AN
ME_055	0.694506	0.343559	0.543533	0.406212	0.919978	0.864392	0.759385	0.304311	0.0798875	0.124831	0.565665	0.397212	AN
ME_056	0.57162	0.0448726	0.00129312	0.00166185	0.0301549	0.047772	0.122932	0.738647	0.836014	0.626992	0.496846	0.00572457	CN
ME_057	0.597366	0.0319265	5.03e-05	5.62e-06	3.84e-05	0.243479	0.493813	0.860541	0.995274	0.0708474	0.965654	0.346218	CN
ME_058	0.323147	0.0800986	0.00226283	0.000534729	0.0471251	0.373223	0.707585	0.474357	0.964774	0.0583709	0.642906	0.252671	CN
ME_059	0.413508	0.561238	0.228854	0.204985	0.79272	0.59003	0.140397	0.0993565	0.85743	0.436243	0.547978	0.342207	CN
ME_060	0.0804444	0.577544	0.423995	0.570715	0.544167	0.706442	0.00500204	0.179088	0.126163	0.0212015	0.746727	0.503408	CN
ME_061	0.594686	0.951623	0.820166	0.824508	0.18583	0.443809	0.772244	0.224326	0.624961	0.110341	0.970303	0.257644	CN
ME_062	0.939147	0.760994	0.402431	0.542038	0.0408633	0.352893	0.958531	0.238783	0.377795	0.076207	0.685955	0.130557	CN
ME_063	0.289916	0.386053	0.162828	0.269557	0.0628956	0.901281	0.033949	0.201002	0.733822	0.741428	0.253121	0.998878	CN
ME_064	0.94853	0.39283	0.0234716	0.0267434	0.00128148	0.981639	0.32855	0.378994	0.28438	0.0985833	0.39722	0.923962	CN
ME_065	0.900432	0.166517	0.00359423	0.0074916	0.000242064	0.832345	0.55939	0.428642	0.683445	0.186051	0.505968	0.804084	CN
ME_066	0.936661	0.186926	0.1319	0.126846	0.845317	0.115941	0.562592	0.445972	0.303257	0.326834	0.654871	0.102422	CN
ME_067	0.993809	0.517193	0.459927	0.263953	0.560739	0.150104	0.747087	0.192169	0.509569	0.378262	0.687717	0.0260261	CN
ME_068	0.808796	0.779	0.704433	0.980612	0.29184	0.610827	0.89095	0.405474	0.931657	0.663359	0.778849	0.177762	CN
ME_069	0.748861	0.234	0.0124143	0.0013355	0.0556382	0.235058	0.505931	0.369827	0.92222	0.435562	0.947555	0.037521	CN
ME_070	0.214292	0.133818	0.0611292	0.0283394	0.171114	0.204636	0.597349	0.252283	0.600215	0.903901	0.759557	0.445815	CN
ME_071	0.623997	0.815767	0.835777	0.159346	0.904873	0.663441	0.915794	0.129806	0.269815	0.802439	0.709375	0.829281	CN
ME_072	0.982802	0.140901	0.037653	0.0636393	0.0965189	0.369581	0.97705	0.801616	0.790823	0.814119	0.979185	0.633642	CN
ME_073	0.950946	0.671941	0.444027	0.58772	0.458785	0.490139	0.20186	0.606067	0.526957	0.74535	0.569169	0.249312	CN
ME_074	0.619607	0.454157	0.17768	0.969401	0.650069	0.273102	0.322323	0.641331	0.015429	0.346359	0.336875	0.418347	CN
ME_075	0.670924	0.294302	0.0885789	0.170612	0.963235	0.146044	0.22252	0.840479	0.0235489	0.339961	0.969708	0.334624	CP
ME_076	0.338338	0.0085169	0.495613	0.896442	0.730437	0.0354793	0.573723	0.747048	0.0646649	0.342224	0.653312	0.0850551	CP
ME_077	0.316317	0.0610705	0.723382	0.379431	0.661176	0.0582748	0.689614	0.75309	0.386411	0.303135	0.615846	0.397681	CP
ME_078	0.314371	0.284294	0.294319	0.156682	0.581664	0.978266	0.30894	0.756255	0.260908	0.573243	0.538686	0.57835	CP
ME_079	0.0352507	0.0658493	0.914907	0.383909	0.749416	0.783827	0.413932	0.242602	0.960129	0.622441	0.555132	0.0997371	CP
ME_080	0.0732242	0.124259	0.76888	0.50532	0.342271	0.404587	0.664928	0.612123	0.858935	0.701579	0.568565	0.439612	CP
ME_081	0.415353	0.896758	0.426633	0.494444	0.247882	0.272029	0.249459	0.345606	0.199572	0.231473	0.73827	0.971793	CP
ME_082	0.390038	0.27087	0.402759	0.918855	0.939244	0.840418	0.979011	0.18258	0.345159	0.622028	0.385859	0.145787	CP
ME_083	0.460107	0.867273	0.862559	0.660834	0.749625	0.0957905	0.681694	0.297346	0.55244	0.256462	0.357663	0.601709	CP
ME_084	0.437562	0.17461	0.95218	0.650085	0.319542	0.0295631	0.485202	0.805475	0.027193	0.0588574	0.574913	0.452245	CP
ME_085	0.246269	0.87561	0.262579	0.344883	0.179425	0.453138	0.810156	0.788322	0.521654	0.163825	0.79809	0.476155	CP
ME_086	0.367548	0.753203	0.325708	0.236132	0.969688	0.67967	0.32221	0.519993	0.130474	0.475155	0.743696	0.725836	CP
ME_087	0.501042	0.163408	0.689532	0.325433	0.810001	0.679725	0.402197	0.913367	0.82142	0.950455	0.727306	0.13831	CP
ME_088	0.585015	0.0387392	0.571724	0.607511	0.833913	0.529326	0.872759	0.5283	0.468933	0.695849	0.892881	0.0538801	CP
ME_089	0.586208	0.00818155	0.330919	0.0832344	0.529317	0.429001	0.588648	0.655692	0.886762	0.710562	0.22399	0.33603	CP
ME_090	0.830932	0.274564	0.689428	0.371896	0.757969	0.758594	0.472406	0.70775	0.938034	0.610352	0.430211	0.556433	CP
ME_091	0.124466	0.00766022	0.112359	0.393132	0.309826	0.215653	0.867561	0.356637	0.203433	0.570032	0.739026	0.316922	CP
ME_092	0.975778	0.0906588	0.0904331	0.0827292	0.0413563	0.304763	0.791199	0.962426	0.230054	0.799137	0.886017	0.919259	CP
ME_093	0.0266453	0.135032	0.952778	0.728069	0.923461	0.244176	0.714529	0.719564	0.614946	0.700503	0.622186	0.568454	CP
ME_094	0.363047	0.453216	0.648479	0.295384	0.587133	0.7087	0.549374	0.537804	0.497498	0.999167	0.754757	0.783149	CP
ME_095	0.922468	0.151683	0.150762	0.335827	0.918198	0.130448	0.409197	0.913032	0.0279491	0.313977	0.96981	0.166603	CP
ME_096	0.312526	0.673896	0.149578	0.323986	0.460019	0.873694	0.589751	0.901673	0.279077	0.855309	0.598968	0.448467	CP
ME_097	0.627479	0.56294	0.591039	0.746908	0.807803	0.579315	0.246332	0.774618	0.132918	0.394086	0.651652	0.648908	CP
ME_098	0.324062	0.914236	0.292443	0.208586	0.537825	0.52112	0.881765	0.537812	0.0985974	0.267026	0.629414	0.678834	CP
ME_099	0.134359	0.982966	0.933744	0.399893	0.843116	0.63411	0.890277	0.459107	0.612759	0.348953	0.609956	0.658906	CP
ME_100	0.263815	0.273203	0.477548	0.860934	0.974241	0.916371	0.792319	0.142767	0.269744	0.876111	0.118911	0.164557	VF
ME_101	0.241349	0.826728	0.658259	0.572555	0.0485746	0.580462	0.484676	0.922713	0.537253	0.244965	0.726872	0.524848	VF
ME_102	0.260975	0.930139	0.316702	0.166019	0.85511	0.97543	0.601417	0.422329	0.30151	0.310098	0.709981	0.330509	VF
ME_103	0.923711	0.927899	0.810428	0.798363	0.11493	0.565297	0.539857	0.864088	0.181526	0.311804	0.524845	0.195001	VF
ME_104	0.978504	0.418271	0.123067	0.256772	0.539775	0.157752	0.373994	0.935549	0.670313	0.42285	0.884551	0.125133	VF
ME_105	0.147446	0.791532	0.443973	0.201254	0.90253	0.845133	0.246188	0.900364	0.196648	0.207038	0.420716	0.410937	VF
ME_106	0.666713	0.85309	0.113977	0.0555023	0.246346	0.618579	0.179761	0.501021	0.486557	0.206969	0.423577	0.891625	VF
ME_107	0.00434293	0.716198	0.777454	0.486039	0.827679	0.857587	0.489053	0.0465384	0.100196	0.401748	0.225596	0.0959851	VF
ME_108	0.383772	0.600538	0.0592997	0.0415594	0.120542	0.713182	0.789608	0.479028	0.443514	0.202904	0.216795	0.735038	VF
ME_109	0.124816	0.569342	0.43507	0.115329	0.624631	0.455425	0.588145	0.472354	0.590811	0.277589	0.408732	0.316979	VF
ME_110	0.128716	0.825729	0.926573	0.722444	0.721315	0.822183	0.415399	0.707056	0.350945	0.538723	0.0782333	0.971078	VF
ME_111	0.276784	0.958987	0.318957	0.707912	0.433377	0.110722	0.653942	0.545843	0.664744	0.322791	0.777897	0.428019	VF
ME_112	0.614118	0.0487622	0.329715	0.488204	0.938088	0.205438	0.0169399	0.755038	0.227132	0.335005	0.831659	0.138414	VF
ME_113	0.337501	0.569135	0.870343	0.699873	0.491395	0.320346	0.332336	0.573077	0.460243	0.378555	0.99966	0.581777	VF
ME_114	0.0867532	0.902525	0.472111	0.222011	0.642716	0.977494	0.453621	0.526577	0.462696	0.89378	0.684458	0.455762	VF
ME_115	0.402319	0.233471	0.218674	0.180433	0.102725	0.465874	0.0421717	0.37979	0.614308	0.91626	0.261655	0.721295	VF
ME_116	0.683923	0.147626	0.0456696	0.0570942	0.064651	0.299514	0.709659	0.525968	0.728303	0.51978	0.311685	0.0887316	VF
ME_117	0.138509	0.13975	0.417736	0.675207	0.239343	0.205234	0.592494	0.619465	0.585097	0.736482	0.574208	0.0288165	VF
ME_118	0.110999	0.363091	0.163934	0.310773	0.103152	0.502294	0.699306	0.371603	0.557956	0.996206	0.0523497	0.161891	VF
ME_119	0.0421008	0.818076	0.895528	0.557479	0.618636	0.734785	0.663401	0.548399	0.197143	0.397331	0.218353	0.324691	VF
ME_120	0.384149	0.292239	0.0170252	0.0422794	0.186591	0.536995	0.48661	0.976707	0.215205	0.125403	0.681341	0.421863	VF
ME_121	0.0331147	0.846979	0.385535	0.21676	0.865462	0.597459	0.83405	0.392907	0.222404	0.121773	0.805347	0.51791	VF
ME_122	0.91579	0.69651	0.0590813	0.110037	0.189389	0.881801	0.335031	0.385499	0.516429	0.163497	0.0648014	0.889466	VF
ME_123	0.341118	0.546409	0.484005	0.517144	0.947007	0.614524	0.229132	0.987495	0.48539	0.247203	0.515879	0.231294	VF
ME_124	0.137185	0.026426	0.00323518	0.0568467	0.0449925	0.356053	0.950644	0.120456	0.777394	0.920152	0.431675	0.027822	VF
ME_125	0.260438	0.0512791	0.151118	0.307905	0.178118	0.252042	0.21802	0.0807842	0.477886	0.148913	0.958242	0.0219903	VI
ME_126	0.0173527	0.399906	0.463871	0.638767	0.978056	0.160056	0.889055	0.892074	0.615336	0.288056	0.490675	0.479139	VI
ME_127	0.0387207	0.980263	0.562038	0.487745	0.435049	0.618383	0.466751	0.724878	0.252263	0.0625422	0.897606	0.737153	VI
ME_128	0.0688749	0.512062	0.950078	0.970747	0.898538	0.326214	0.116444	0.915121	0.324375	0.092402	0.796096	0.530555	VI
ME_129	0.982391	0.564609	0.197749	0.241386	0.323652	0.664311	0.479422	0.679802	0.331747	0.255715	0.435832	0.404227	VI
ME_130	0.067717	0.58236	0.261655	0.354507	0.627519	0.421395	0.908747	0.923696	0.92919	0.766148	0.404525	0.630831	VI
ME_131	0.518224	0.197511	0.313061	0.36813	0.299138	0.0713135	0.125007	0.406041	0.458813	0.995344	0.778315	0.206898	VI
ME_132	0.0652094	0.0414471	0.18496	0.445941	0.880349	0.419182	0.303692	0.478351	0.897145	0.743981	0.990583	0.119464	VI
ME_133	0.327828	0.11629	0.811675	0.556307	0.57334	0.10721	0.161521	0.645159	0.443762	0.708032	0.84512	0.0268184	VI
ME_134	0.0235972	0.0760868	0.51025	0.971949	0.915812	0.0856923	0.188958	0.714503	0.99964	0.53709	0.966721	0.0205764	VI
ME_135	0.206097	0.35284	0.777872	0.365267	0.502594	0.395339	0.670679	0.616808	0.549958	0.281189	0.692209	0.150277	VI
ME_136	0.66195	0.750315	0.420787	0.314284	0.264525	0.909752	0.250027	0.293706	0.946525	0.859433	0.560988	0.292224	VI
ME_137	0.982503	0.496728	0.959171	0.960997	0.779799	0.702645	0.0952561	0.232177	0.681766	0.427149	0.577966	0.319651	VI
ME_138	0.362567	0.680395	0.572999	0.598078	0.26765	0.435022	0.866163	0.952344	0.588387	0.36972	0.379667	0.825822	VI
ME_139	0.104794	0.421682	0.361746	0.427736	0.359778	0.534448	0.238384	0.537718	0.188332	0.0349243	0.846259	0.179587	VI
ME_140	0.0223634	0.776981	0.829243	0.339541	0.597413	0.873573	0.750511	0.536875	0.290736	0.065307	0.8197	0.35864	VI
ME_141	0.516254	0.436656	0.879936	0.607359	0.908476	0.710703	0.460426	0.0452283	0.135912	0.493368	0.151236	0.134384	VI
ME_142	0.264628	0.902399	0.907726	0.714351	0.945464	0.698617	0.141803	0.0774639	0.00534558	0.0213449	0.931526	0.784304	VI
ME_143	0.14758	0.843453	0.902275	0.91363	0.564475	0.474135	0.505565	0.157466	0.00404257	0.0236011	0.219997	0.522673	VI
ME_144	0.0888315	0.629843	0.813148	0.980686	0.404256	0.48936	0.799444	0.0171264	0.310116	0.0977042	0.670191	0.314186	VI
ME_145	0.622808	0.600382	0.360038	0.968743	0.404404	0.221175	0.222305	0.838133	0.68543	0.522877	0.778329	0.506722	VM
ME_146	0.912408	0.402421	0.436748	0.766183	0.34369	0.213502	0.0884238	0.636088	0.277477	0.559698	0.747846	0.405304	VM
ME_147	0.0123469	0.416677	0.319019	0.401826	0.699172	0.842902	0.313639	0.5011	0.102939	0.190259	0.973307	0.257144	VM
ME_148	0.180131	0.693302	0.839154	0.981937	0.251552	0.891172	0.570942	0.697893	0.382706	0.563908	0.869348	0.993662	VM
ME_149	0.0622088	0.0522701	0.0288423	0.118586	0.49916	0.036427	0.0951357	0.236492	0.915246	0.982835	0.730554	0.0316158	VM
ME_150	0.0795834	0.415813	0.264216	0.246688	0.996117	0.407875	0.878777	0.736789	0.162462	0.319965	0.693899	0.152925	VM
ME_151	0.236109	0.613444	0.828351	0.273994	0.658546	0.449792	0.820344	0.469417	0.949715	0.425036	0.204383	0.345941	VM
ME_152	0.373349	0.537145	0.581867	0.249425	0.739635	0.961657	0.137147	0.266291	0.280713	0.73485	0.519269	0.960153	VM
ME_153	0.448421	0.080603	0.100541	0.132807	0.614378	0.0228307	0.0189872	0.622786	0.841353	0.861007	0.515199	0.207202	VM
ME_154	0.0987727	0.538291	0.853181	0.609921	0.182133	0.375709	0.632375	0.541864	0.252481	0.882866	0.555026	0.88646	VM
ME_155	0.198717	0.138511	0.43067	0.384467	0.597171	0.0176247	0.0239079	0.323014	0.966816	0.745449	0.642423	0.594011	VM
ME_156	0.234095	0.38831	0.90488	0.672251	0.399954	0.152306	0.0491541	0.266383	0.618211	0.167933	0.252746	0.923965	VM
ME_157	0.475804	0.566577	0.137358	0.371336	0.346034	0.695766	0.875189	0.58023	0.554992	0.693248	0.741406	0.0302051	VM
ME_158	0.105779	0.525022	0.619178	0.632873	0.761817	0.58109	0.703655	0.27621	0.915403	0.422346	0.343667	0.117246	VM
ME_159	0.257433	0.925149	0.531753	0.562459	0.845307	0.441691	0.0375675	0.935315	0.160591	0.306394	0.794037	0.394118	VM
ME_160	0.71134	0.900126	0.118799	0.056846	0.345731	0.724255	0.327125	0.979649	0.448474	0.935944	0.861053	0.362098	VM
ME_161	0.167618	0.986525	0.916393	0.259941	0.855792	0.859161	0.571936	0.681839	0.514803	0.0433813	0.49143	0.84375	VM

## Sheet: i
supplementary file 1i. The R values of the Module-Trait correlations in the female-infant placentas.
	Population	BW	BPD	FL	GT	PW	PLV	AG	AFMD	AFI	FH	FUH	Layers
ME_001	-0.181982	0.129952	0.167887	0.292537	-0.00114816	0.0231742	0.256489	-0.531866	0.163709	0.124528	0.133009	-0.32188	UC
ME_002	0.117393	0.286893	0.394103	0.484605	0.21749	-0.00618531	0.0968943	-0.384856	0.193976	-0.0564346	0.203772	-0.0368471	UC
ME_003	0.236909	0.299613	0.299136	0.409401	0.0625507	0.0491956	0.190371	-0.181291	0.329106	-0.0662808	0.0949531	0.130129	UC
ME_004	-0.0265214	-0.119763	0.0153416	0.0576326	-0.227821	-0.0178891	0.0765808	-0.185661	-0.0119781	0.0650505	0.106365	-0.156343	UC
ME_005	-0.148572	-0.124878	-0.175988	-0.0365576	-0.301597	-0.0416953	0.377648	-0.297998	0.168819	0.250957	-0.135706	-0.38681	UC
ME_006	-0.106641	-0.285353	-0.203865	-0.0809015	-0.381501	-0.0353616	0.267791	-0.100341	0.0950252	0.115584	-0.0263665	-0.19347	UC
ME_007	-0.00844914	0.0111189	0.193353	0.359197	-0.0516646	-0.0102672	0.288446	-0.376562	0.202646	0.0295664	0.116582	-0.184437	UC
ME_008	-0.338986	-0.433503	-0.442554	-0.401908	-0.361406	-0.075564	-0.0119781	0.0471338	-0.143549	0.216786	-0.0929188	-0.306954	UC
ME_009	-0.348965	-0.371225	-0.487786	-0.498991	-0.155003	0.00251594	-0.0566366	0.0129125	-0.148825	0.0672127	-0.314411	-0.261252	UC
ME_010	-0.117211	-0.0589966	-0.149421	-0.0119066	-0.243568	-0.17348	0.100887	-0.00329812	0.261159	0.312495	-0.0313131	-0.0794021	UC
ME_011	-0.100421	-0.0273084	-0.10714	-0.0839601	-0.162614	-0.120738	-0.0549038	0.166823	0.0854015	0.173878	-0.0467394	-0.113048	UC
ME_012	-0.0814257	-0.0198874	-0.117329	-0.15452	-0.0046278	-0.320245	0.0513882	-0.117127	0.215217	-0.283905	-0.454813	-0.16602	UC
ME_013	0.188034	0.00463491	-0.185011	-0.265006	-0.37145	-0.051726	-0.0234553	0.416479	0.0195199	-0.145839	-0.204997	0.222924	UC
ME_014	-0.163997	-0.290171	-0.505257	-0.564353	-0.551161	-0.145942	0.00320031	0.322773	-0.0909138	0.15592	-0.197525	-0.106911	UC
ME_015	0.108465	0.269487	0.241578	0.16092	0.210802	-0.121224	-0.283968	-0.204135	0.31943	0.160097	0.184987	0.0159411	UC
ME_016	-0.0320476	0.177751	0.00484969	0.0460231	0.0631222	-0.175826	-0.200416	0.0154796	0.260712	0.234449	-0.0116507	0.000818567	UC
ME_017	0.109505	0.361661	0.330594	0.371303	0.38349	-0.0147754	-0.11362	-0.112033	0.17976	-0.0457337	0.0591487	0.157716	UC
ME_018	-0.139558	0.0220513	-0.031608	0.00367997	-0.0145051	-0.191097	0.122462	-0.290827	0.169654	0.23115	-0.0499367	-0.366029	UC
ME_019	-0.164038	-0.0636064	-0.1213	-0.0031641	-0.242965	-0.216577	0.0123694	-0.198753	0.16646	0.21915	-0.0335356	-0.2657	UC
ME_020	0.0654007	0.169443	0.267562	0.223358	0.361602	0.00213603	-0.0319532	-0.171017	0.0176196	-0.106516	0.0943326	-0.0362805	UC
ME_021	-0.235696	-0.104608	-0.107336	-0.168905	0.14724	-0.114999	-0.0599313	-0.0489361	-0.0605563	0.0862524	-0.0954387	-0.258722	UC
ME_022	0.00191272	0.0127459	0.0633965	-0.0811174	0.137738	-0.0520887	-0.152693	-0.0543409	-0.174356	-0.0521265	0.0271739	-0.109395	UC
ME_023	0.160175	0.0738564	0.143682	0.00268378	0.0949608	0.110659	-0.397615	0.238477	-0.198038	-0.122021	0.231744	0.365348	UC
ME_024	-0.0604112	-0.0197003	0.0497156	-0.0257598	0.0555331	0.0804353	-0.250121	0.0630998	-0.239117	-0.0238462	0.0412812	0.0252185	UC
ME_025	-0.1947	-0.15593	-0.121349	-0.216581	0.225064	0.103091	-0.150777	0.0941383	-0.373418	-0.164127	-0.141983	-0.0441839	UC
ME_026	0.101194	0.177313	0.298286	0.175054	0.452653	0.139803	-0.270988	0.0886222	-0.274445	-0.305438	0.0847336	0.240389	UC
ME_027	0.0256905	-0.00813806	0.0769066	0.00213266	0.193845	0.259879	-0.295367	0.243598	-0.454062	-0.316194	0.00957634	0.308456	UC
ME_028	0.0995451	0.0375093	-0.116163	-0.149238	0.105777	0.115668	0.219131	-0.0703764	-0.284373	-0.265279	-0.210679	-0.164444	UC
ME_029	0.444584	0.199069	0.208509	0.0788786	0.180985	0.0342627	-0.0227892	-0.126778	-0.161369	-0.28034	-0.0235501	-0.0267358	UC
ME_030	0.0819876	0.0806435	-0.0651549	-0.134893	-0.000388047	-0.0661487	0.216207	0.239503	0.175357	0.217799	-0.0889415	0.136691	UC
ME_031	0.404437	0.0506863	0.0968121	-0.0333835	0.18623	0.052424	-0.0441074	0.265453	-0.162796	-0.32005	-0.191959	0.253418	UC
ME_032	0.132546	-0.279006	-0.283424	-0.302283	-0.131533	0.091898	-0.119129	0.508322	-0.197884	-0.12814	-0.231677	0.3214	UC
ME_033	0.45343	0.289928	0.19897	0.181406	-0.123419	0.116445	0.0197091	0.123975	0.244446	-0.126921	0.0284517	0.289501	UC
ME_034	0.398908	0.311953	0.13485	0.024524	0.0379028	0.185354	0.00640973	0.276606	0.149732	-0.174524	-0.00883594	0.411686	UC
ME_035	-0.107638	0.217311	0.323154	0.383947	0.215047	-0.0644595	-0.0519032	-0.289199	0.110363	0.119914	0.117112	-0.0608545	UC
ME_036	0.0090899	-0.336524	-0.536278	-0.522521	-0.219203	-0.38519	-0.188705	-0.306104	0.155211	-0.0447964	-0.161041	-0.373056	AN
ME_037	-0.0205308	-0.028165	-0.0634945	-0.00215158	0.176277	-0.108519	-0.0184412	-0.389126	0.419992	0.000309343	-0.245247	-0.45829	AN
ME_038	-0.0119156	-0.259451	-0.38399	-0.372691	-0.0984466	-0.0993914	-0.355229	0.00124267	0.272442	0.0132285	-0.368015	-0.252516	AN
ME_039	0.0405878	0.347432	0.600726	0.645836	0.778232	0.0927906	0.0605659	-0.0938831	0.100005	-0.251927	0.118567	-0.0163838	AN
ME_040	0.0534768	0.256717	0.416546	0.503608	0.498515	0.00176521	0.137219	-0.255663	-0.136154	-0.299853	0.284026	-0.180166	AN
ME_041	0.0256342	0.411288	0.600865	0.632453	0.492402	0.149993	0.131732	0.00739734	-0.198513	-0.238417	0.289259	0.136816	AN
ME_042	0.0949098	0.396636	0.358911	0.405776	0.510273	0.231174	-0.0361649	0.217785	-0.0228026	-0.0907188	0.0924907	0.120213	AN
ME_043	-0.0495191	0.148201	0.198764	0.226583	0.00282438	0.145658	0.251163	-0.00983835	-0.430018	-0.323095	0.345621	0.150936	AN
ME_044	0.0717591	-0.125628	0.0163654	0.00977683	-0.138941	-0.0563341	0.165378	-0.0711827	-0.594316	-0.288094	0.402601	0.131116	AN
ME_045	0.381762	0.0578576	0.169246	0.193885	0.243773	-0.173061	0.0555522	0.10268	-0.44777	-0.320461	0.475822	0.129956	AN
ME_046	-0.0387958	-0.157896	-0.251662	-0.323667	-0.259376	-0.285579	-0.26687	0.0726757	-0.559127	-0.259249	0.313959	0.129674	AN
ME_047	-0.0884642	-0.344243	-0.638627	-0.667738	-0.603232	-0.238415	-0.125448	-0.113401	-0.122113	0.168433	-0.0554326	-0.172119	AN
ME_048	0.0270043	-0.250593	-0.423108	-0.461714	-0.608833	-0.100383	-0.0560236	-0.0304587	-0.4739	-0.05506	0.168733	0.0744448	AN
ME_049	-0.0838888	-0.23935	-0.189477	-0.277726	-0.516451	0.00807481	0.0795009	0.225825	-0.0882467	0.224475	-0.110147	0.272523	AN
ME_050	-0.00161095	-0.0441263	-0.119358	-0.194535	-0.28609	0.174195	-0.0507294	0.498742	-0.0671652	0.264442	-0.097217	0.427295	AN
ME_051	-0.0504227	0.115503	0.258209	0.20375	-0.030853	0.155274	0.111914	0.302735	-0.253894	-0.0238799	0.0681718	0.383761	AN
ME_052	0.146342	0.000367456	-0.202765	-0.200726	-0.121123	0.113774	-0.196043	0.362662	0.000748949	0.240593	-0.0306219	0.076122	AN
ME_053	-0.0080272	0.279173	0.0946018	0.102299	0.034388	0.22078	-0.0894844	0.307572	-0.0938948	0.0714679	-0.0603406	0.197744	AN
ME_054	-0.105978	-0.0106425	-0.353449	-0.364742	-0.410921	0.0539191	-0.155394	0.154296	-0.00735956	0.207049	-0.272477	0.0215822	AN
ME_055	0.0792136	-0.189591	-0.122254	-0.166607	-0.0202921	0.0344902	0.0618138	0.20529	0.342966	0.302718	-0.115653	0.169776	AN
ME_056	0.105654	-0.36279	-0.551731	-0.541335	-0.389859	-0.358329	-0.282987	-0.0624316	-0.0387561	-0.0908338	-0.12675	-0.484666	CN
ME_057	-0.0986896	-0.386097	-0.6618	-0.717224	-0.669282	-0.21587	-0.127637	0.0328974	0.00110952	0.328871	-0.00806501	-0.175062	CN
ME_058	-0.18348	-0.319166	-0.528071	-0.585844	-0.359306	-0.165628	0.0701706	-0.133397	0.0082719	0.343661	0.0866772	-0.211811	CN
ME_059	-0.152268	-0.108501	-0.222544	-0.234087	0.0491895	-0.10066	0.270947	-0.301443	0.0336388	0.145051	0.112174	-0.1765	CN
ME_060	-0.31882	-0.104039	-0.148912	-0.105901	-0.113237	0.0704575	0.491333	-0.247711	0.280669	0.412222	0.0604355	-0.124839	CN
ME_061	0.0994082	0.011363	0.0425606	0.0415164	0.244038	-0.142696	0.0541732	-0.224669	-0.0913673	-0.292477	0.00697279	-0.209655	CN
ME_062	0.0142983	0.0569267	0.155864	0.113832	0.369354	-0.17269	0.00973892	-0.217983	-0.164071	-0.323137	0.0756272	-0.277585	CN
ME_063	0.196287	-0.161286	-0.256989	-0.2046	-0.338034	-0.0232304	-0.382004	0.236101	0.0636267	-0.0617439	-0.211614	0.000263467	CN
ME_064	-0.0120905	-0.159027	-0.40591	-0.397642	-0.5521	0.00431063	-0.181476	0.163665	0.198509	0.302102	-0.157576	-0.0178755	CN
ME_065	-0.0234312	-0.254828	-0.507133	-0.470969	-0.613556	-0.0396354	-0.109011	0.14744	0.0762643	0.243919	-0.124097	0.0464382	CN
ME_066	-0.0148835	0.24345	0.276658	0.280184	0.0365299	0.288162	0.108129	0.142026	0.19104	0.18211	-0.0835785	0.298869	CN
ME_067	0.00145327	0.120866	0.137749	0.20696	-0.108639	0.264722	0.0603467	0.240669	0.123057	0.163913	-0.0751803	0.39938	CN
ME_068	0.0453002	-0.0525251	-0.0709621	0.00455165	-0.195521	0.0951005	0.0256753	0.154871	0.0160622	0.0813936	-0.0525616	0.248444	CN
ME_069	0.0599093	0.220164	0.443683	0.550414	0.347227	0.219679	0.124108	0.166791	-0.0182862	-0.145264	0.0123198	0.375233	CN
ME_070	0.229482	0.275346	0.340192	0.393905	0.252183	0.234262	-0.0986942	0.21198	-0.097927	0.022611	-0.0572791	0.142075	CN
ME_071	-0.0916208	-0.0436192	0.0388128	0.259061	-0.0223812	-0.0813723	-0.0198023	0.278107	0.204492	0.0468358	-0.0697216	0.0403703	CN
ME_072	-0.00403751	0.270616	0.374993	0.33714	0.30388	0.166876	-0.00538827	0.0470349	0.0496498	-0.0440163	0.00488672	0.0890918	CN
ME_073	0.0115223	-0.0791951	-0.142628	-0.101283	-0.138096	-0.128716	-0.235665	0.0963657	0.118082	-0.0607753	-0.106324	-0.213283	CN
ME_074	0.0927772	0.139509	0.24849	0.0071848	0.0848194	0.203124	0.183787	-0.0870865	-0.431244	-0.175012	0.178428	0.150714	CN
ME_075	-0.0808816	-0.19798	-0.316314	-0.256864	-0.00878885	-0.271922	-0.229478	-0.0383655	-0.412354	-0.180452	-0.00724065	-0.182423	CP
ME_076	0.181049	0.4716	0.129381	-0.0248141	-0.0656255	0.385332	0.106962	0.0614415	0.341605	0.179622	0.0854882	0.319681	CP
ME_077	0.189333	0.346013	-0.0674116	-0.166421	-0.0834257	0.349583	0.0760416	0.0599267	0.164031	0.194464	0.0954523	0.160223	CP
ME_078	0.190082	0.202047	-0.197973	-0.265195	-0.104764	0.00519451	-0.192187	0.0591346	-0.211921	-0.107095	0.116826	0.10568	CP
ME_079	0.385774	0.340195	0.0203719	-0.164885	-0.0608475	0.0522734	-0.154838	0.220062	0.00953215	-0.0936808	0.11216	0.306282	CP
ME_080	0.331831	0.286896	-0.0559844	-0.126506	-0.179604	0.15792	-0.0824448	-0.0964555	0.0338793	-0.0729678	0.108396	0.146565	CP
ME_081	0.154373	-0.0247381	-0.150712	-0.129729	-0.217674	-0.207157	-0.216967	-0.178388	-0.240971	-0.225213	0.0636488	0.00674229	CP
ME_082	0.162798	0.207648	0.158527	0.0194237	-0.0145326	-0.0383803	-0.00501644	0.250083	0.17855	-0.0937916	-0.164218	0.272089	CP
ME_083	0.140149	-0.0318583	-0.0330005	-0.0835151	-0.0607949	-0.309728	-0.0780867	0.196761	-0.112919	-0.213863	-0.174046	0.0992759	CP
ME_084	-0.147216	-0.254563	0.0114343	0.0863373	0.188098	-0.397615	-0.132496	-0.0469317	-0.403102	-0.348828	-0.106631	-0.142592	CP
ME_085	-0.2184	0.0298411	0.211197	0.178651	0.25184	-0.142314	0.0457811	-0.0511613	-0.121729	-0.26086	-0.0487498	0.135231	CP
ME_086	0.17055	-0.0598983	0.185758	0.223037	0.00724551	0.0786107	0.187082	0.122212	0.28244	0.135535	-0.0622834	-0.0667897	CP
ME_087	0.12777	-0.261109	0.0760628	0.185862	0.0458192	-0.0785965	0.158714	0.0207419	-0.0430194	-0.0118474	-0.0664176	-0.277039	CP
ME_088	-0.103841	-0.379257	-0.107517	0.097702	0.0399662	-0.119511	0.0305307	-0.119807	-0.137434	0.0744376	0.0256721	-0.355478	CP
ME_089	-0.103513	-0.473745	0.183802	0.321462	0.119514	-0.149951	-0.102843	-0.084863	-0.027148	-0.0706718	-0.22877	-0.181902	CP
ME_090	0.0406938	-0.206089	0.0760896	0.16903	-0.0587059	-0.0585498	0.136372	-0.0713894	0.0148226	0.0969337	0.149562	-0.111793	CP
ME_091	-0.286744	-0.477231	-0.295908	-0.161752	-0.191842	-0.232829	-0.0317888	-0.174412	-0.238976	-0.107987	-0.0634584	-0.1891	CP
ME_092	-0.00578936	-0.314374	-0.314583	-0.321962	-0.37467	-0.193823	-0.0504503	-0.00898244	-0.225881	-0.0484918	0.0273276	0.0193265	CP
ME_093	-0.404425	-0.27927	-0.0112913	0.0662243	0.0183177	0.219347	-0.0696608	0.0683805	-0.0956945	0.0732434	0.0937492	0.108427	CP
ME_094	-0.172135	0.142289	-0.0867605	-0.197546	-0.103259	0.0711469	0.113786	-0.117078	0.12882	-0.000199026	0.0595093	0.0524413	CP
ME_095	-0.0185561	0.268314	0.268897	0.181977	0.0195813	0.282458	0.156395	0.0208224	0.401311	0.190234	0.00721641	0.259211	CP
ME_096	-0.190795	0.0801087	0.269649	0.186409	0.140177	0.0303045	0.102541	-0.0235545	0.204203	-0.034759	-0.100022	0.143774	CP
ME_097	-0.092333	0.109967	0.102187	0.0614767	0.0463593	0.105413	-0.218371	-0.0545576	0.280731	0.161431	0.0859248	-0.0866475	CP
ME_098	-0.18638	-0.0205332	0.198729	0.236354	0.117072	0.121884	-0.0283541	-0.117075	0.307267	0.209285	0.0918164	-0.0788275	CP
ME_099	-0.279733	-0.00407093	-0.0158511	0.159483	0.0377232	0.0905655	0.0263001	-0.140459	-0.0962839	0.177173	0.0970409	0.08402	CP
ME_100	0.214508	0.210437	0.137303	0.034018	0.006272	-0.0203942	0.05111	0.278983	0.211926	0.0302752	-0.296053	0.265115	VF
ME_101	0.224652	0.0424997	-0.0857572	-0.109279	-0.369425	-0.107049	0.13511	0.0188429	0.11941	0.222978	0.0677677	-0.123044	VF
ME_102	-0.215759	0.0170277	0.192654	0.264233	0.0354576	0.00598223	0.101203	-0.154911	0.198679	0.19525	0.0721399	-0.187332	VF
ME_103	-0.0185989	-0.017575	-0.0465676	0.0495911	-0.299142	-0.111338	0.118652	0.0332393	0.255197	0.194577	-0.123045	-0.247773	VF
ME_104	0.00523357	0.156253	0.292909	0.217625	0.118676	0.269297	-0.171399	0.0157064	0.08255	0.154739	-0.0281984	0.291376	VF
ME_105	-0.275883	-0.0513078	0.14787	0.244449	0.0237845	-0.0379276	-0.222416	0.0243156	0.246891	0.241437	-0.155443	-0.158697	VF
ME_106	-0.0835054	0.0359572	0.299894	0.359416	0.222344	0.096479	-0.256197	-0.130143	0.134534	0.241472	0.1545	-0.0264602	VF
ME_107	-0.513979	-0.0705266	0.0548582	0.134693	0.0422632	0.0348452	-0.133772	-0.372581	0.311319	0.161793	-0.232144	-0.315045	VF
ME_108	-0.16797	0.101446	0.354341	0.380788	0.29481	0.0713088	-0.0517921	-0.136847	0.148018	0.243584	0.236484	0.0656658	VF
ME_109	-0.29161	-0.110189	0.150743	0.298829	0.0948263	0.14422	-0.104895	-0.138912	0.10415	0.208566	0.159436	-0.192546	VF
ME_110	-0.288759	0.0427486	-0.0178992	0.0689107	-0.0692023	0.0436321	0.157207	0.0729005	0.179698	0.118982	-0.332267	-0.00704226	VF
ME_111	-0.208908	0.00998845	-0.191775	-0.0726777	-0.151293	0.302495	0.0869111	0.116917	0.0840288	0.19029	-0.0547463	0.153041	VF
ME_112	0.0977014	0.36914	0.187634	0.134031	0.0150865	0.242265	0.439914	0.0605477	0.231398	0.185628	-0.0412728	0.281933	VF
ME_113	-0.184689	0.110247	-0.0316964	-0.0747728	-0.133058	0.191236	0.186638	-0.109131	0.142699	0.169793	-8.27379e-05	0.106679	VF
ME_114	-0.323666	-0.0237857	0.138987	0.233898	0.0899255	-0.0054797	0.144792	0.122535	0.141928	0.0259311	-0.0788134	-0.144113	VF
ME_115	-0.1616	0.228356	0.235547	0.255815	0.309138	-0.140932	0.379737	-0.16936	0.0976494	0.0204213	0.215458	-0.0692075	VF
ME_116	-0.0789544	-0.275766	-0.373961	-0.357257	-0.347605	-0.199484	-0.0722235	0.122714	-0.0673988	-0.124541	-0.194623	-0.321762	VF
ME_117	-0.281868	-0.281021	-0.15643	-0.0812539	-0.225587	-0.24237	-0.103681	0.0962367	0.105748	0.0652948	-0.108811	-0.406115	VF
ME_118	0.302272	0.175286	0.265493	0.194984	0.308773	0.12976	-0.0749207	-0.172246	-0.113433	0.000923746	0.363841	0.266738	VF
ME_119	0.379858	0.0446568	-0.025502	-0.113569	0.0964634	0.0657308	-0.0843862	-0.116179	-0.246627	-0.163296	0.235707	0.189557	VF
ME_120	0.167838	-0.202449	-0.439609	-0.379554	-0.252363	-0.119485	0.134518	-0.00567126	-0.23728	-0.291176	-0.0796343	-0.155065	VF
ME_121	0.39671	-0.0374702	-0.167357	-0.236501	-0.0329002	-0.1023	0.0406782	0.164811	-0.233704	-0.29388	0.0478396	0.125095	VF
ME_122	0.0205364	-0.0756517	-0.354626	-0.30305	-0.25082	-0.0288749	0.185618	0.167369	-0.125534	-0.265758	-0.347422	-0.0269906	VF
ME_123	0.183334	0.116754	-0.135316	-0.125322	-0.0129098	0.0975901	0.230432	0.00304437	-0.134892	-0.221951	-0.125697	0.229395	VF
ME_124	0.282779	0.41185	0.528083	0.357589	0.375051	0.177831	-0.0120227	0.294875	0.0548733	-0.0194692	0.151847	0.408452	VF
ME_125	0.20497	-0.347562	-0.259734	-0.186069	-0.244135	-0.208542	-0.223886	-0.313319	-0.130101	-0.261094	-0.00963924	-0.403575	VI
ME_126	0.417762	0.154046	0.13424	0.08626	-0.00506383	0.254364	0.025678	-0.0249752	-0.0923077	-0.193728	-0.126379	0.129734	VI
ME_127	0.367157	-0.0045546	-0.106441	-0.127227	-0.142965	0.0915161	-0.133384	-0.064726	-0.208447	-0.333016	-0.0236881	-0.0617303	VI
ME_128	0.325724	-0.120263	-0.0115259	-0.00675117	-0.0234713	-0.179275	-0.283069	0.0196198	-0.179947	-0.30251	-0.0475454	-0.115076	VI
ME_129	-0.00406339	-0.105746	-0.233818	-0.21319	-0.180211	-0.0797667	-0.129651	-0.075875	-0.177268	-0.20697	0.142724	-0.152655	VI
ME_130	-0.327017	-0.100985	-0.204459	-0.169222	-0.0891518	-0.147209	-0.0210992	0.0176317	-0.0163589	0.0547139	0.152559	-0.0882982	VI
ME_131	0.118525	-0.233938	-0.184131	-0.164554	-0.189412	-0.323055	-0.276875	0.152074	-0.13575	0.00107428	0.0517927	-0.229252	VI
ME_132	-0.329877	-0.362511	-0.240453	-0.139632	-0.0277069	-0.147904	-0.187668	0.129965	0.0237952	0.0600705	0.0021729	-0.280847	VI
ME_133	-0.178688	-0.283183	0.0438439	0.107996	0.103396	-0.290142	-0.253504	-0.0846258	-0.140295	-0.068864	-0.0359523	-0.391225	VI
ME_134	-0.399237	-0.318031	-0.120776	-0.00647368	0.0194597	-0.308616	-0.238345	-0.0672707	8.31302e-05	0.113264	0.00768083	-0.407614	VI
ME_135	-0.229646	-0.169801	0.0518988	0.165527	0.122954	-0.155526	-0.0781628	-0.0919251	0.109727	0.196456	-0.0727813	-0.260251	VI
ME_136	-0.0803629	0.0585351	-0.1474	-0.183674	-0.203259	0.020866	0.209411	0.191515	-0.0123475	0.032595	0.106725	0.192093	VI
ME_137	-0.00403747	0.124635	-0.00942472	-0.00900281	-0.0514372	0.0701943	0.300015	0.217318	0.075384	0.145412	-0.102158	0.181683	VI
ME_138	-0.166448	0.0757268	0.103488	0.0968234	0.201963	-0.142974	-0.03102	0.0110022	0.0993838	0.164016	0.16068	0.0404973	VI
ME_139	-0.292068	0.147119	0.166729	0.145229	0.167404	0.113996	0.214524	0.113091	0.238673	0.374088	-0.0356847	0.243336	VI
ME_140	-0.402545	-0.0521122	0.0396901	0.174476	0.0969986	0.0292884	0.0584877	-0.113324	0.192675	0.329765	0.0419439	-0.167795	VI
ME_141	0.119079	0.142471	0.0278032	-0.0943883	-0.0211621	-0.0682058	0.135267	0.356457	0.269424	0.125602	-0.259662	0.270441	VI
ME_142	-0.203217	0.0225739	0.0213362	0.0673082	0.0125927	-0.0711913	0.265581	0.316627	0.480789	0.405391	-0.0158178	0.0503594	VI
ME_143	0.261923	-0.0363441	0.0226026	0.0199659	-0.105782	-0.131203	0.122107	0.255897	0.494186	0.399227	0.222952	-0.117276	VI
ME_144	-0.305715	-0.0885525	-0.043495	-0.00445693	0.152646	0.126759	-0.0467484	-0.418532	0.185236	0.29792	-0.0782855	-0.183711	VI
ME_145	-0.0919338	-0.0978823	-0.170181	0.00733922	-0.155219	-0.226164	-0.225626	-0.0382487	-0.0757605	0.119242	-0.0526886	-0.123879	VM
ME_146	-0.0206014	-0.155868	-0.144893	-0.0556553	-0.175967	-0.229868	-0.311144	-0.0884528	-0.201319	-0.108926	-0.0601595	-0.154926	VM
ME_147	0.443989	0.151249	0.185024	0.156062	-0.0722859	0.0371073	-0.187056	0.12551	-0.298441	-0.241676	0.00626718	0.209871	VM
ME_148	0.247136	0.0737673	-0.0380041	0.00424063	-0.212299	0.0256227	-0.105839	0.0726085	-0.162411	-0.107767	-0.0308015	0.00148774	VM
ME_149	0.338868	0.351818	0.392764	0.286177	0.126075	0.37725	0.305087	0.219024	-0.0199316	0.00402986	0.0644376	0.386744	VM
ME_150	0.319683	0.151526	0.206848	0.214441	-0.000911533	0.15409	-0.0285616	0.0628915	-0.257205	-0.184669	-0.0736164	0.262968	VM
ME_151	0.219199	0.0944065	-0.0405935	-0.202755	-0.0826312	-0.140848	0.0425176	0.134879	0.0118118	-0.148582	-0.234389	0.175161	VM
ME_152	0.165585	0.115205	-0.102866	-0.213233	-0.0621872	0.00900439	0.273101	0.205971	0.199997	-0.0633719	-0.120272	-0.00935785	VM
ME_153	-0.14127	-0.318662	-0.300441	-0.276036	-0.0941593	-0.407639	-0.418942	-0.0919396	-0.0374778	-0.0327865	-0.121437	-0.232977	VM
ME_154	-0.30194	-0.114883	-0.0346519	-0.095341	0.24604	-0.16478	-0.089423	-0.113881	0.211894	0.0275914	-0.110217	-0.0267392	VM
ME_155	-0.237269	-0.272192	-0.146801	-0.161818	0.0987419	-0.423406	-0.404755	-0.183529	-0.00779197	-0.0607507	-0.0868027	-0.0995894	VM
ME_156	-0.22012	-0.160532	-0.0223796	-0.0791158	0.156676	-0.263351	-0.356279	-0.205932	0.0931456	-0.254008	-0.211778	-0.0178748	VM
ME_157	-0.132964	-0.107034	-0.27296	-0.166274	-0.175128	-0.0731448	0.0294134	-0.10331	0.110226	0.0737808	0.0617494	-0.38975	VM
ME_158	-0.296115	-0.118632	-0.0928905	0.0892928	-0.0567248	0.103076	0.0711577	-0.201841	0.0198946	0.149437	0.175975	-0.287178	VM
ME_159	-0.209746	0.0175957	-0.116725	-0.108165	0.0365325	0.143353	0.375149	-0.0152006	0.258316	0.189827	0.0488701	-0.1586	VM
ME_160	-0.0692293	-0.0235038	-0.286019	-0.345634	-0.175236	0.0660039	0.182003	-0.00477796	0.141254	0.0150524	0.0327755	-0.169463	VM
ME_161	-0.25419	0.00316327	0.0196609	0.208669	-0.0340293	0.0332262	0.105567	-0.0766722	0.121551	0.365174	-0.128336	0.0369047	VM

## Sheet: j
supplementary file 1j. TSNGs in the seven layers of placenta.
Sex-combined
Gene	CMS score	Layers	topSNP	CMS score	FST(Tibetan-Han)	DafTBN	DafCHB	DafJPT	DafCEU	DafYRI	Daf35TBN	Daf35Han
EPAS1	18	UC	rs74898705	17.22	0.68	0.8	0.01	0	0.03	0.16	0.73	0.035
TGFBR3	8.5	VI	rs75022899	8.47	0.32	0.01	0.13	0.14	0.24	0.25	0	0
FOXJ3	8.4	VI	rs343383	8.39	0.08	0.44	0.23	0.27	0.3	0.37	0.43	0.21
HSD11B1	8	VI	rs79711593	7.99	0.17	0	0.05	0.02	0.02	0.05	0	0.035
Male
Gene	CMS score	Layers	topSNP	CMS score	FST(Tibetan-Han)	DafTBN	DafCHB	DafJPT	DafCEU	DafYRI	Daf35TBN	Daf35Han
EGLN1	16	UC	rs186996510	15.63	0.53	0.7	0.03	0.06	0	0	0.7	0.05
L3MBTL2	12	UC	rs5751069	9.69	0.29	0.9	0.62	0.79	0.67	0.46	0.94	0.55
ZNF160	9	VF	rs329706	8.3	0.24	0.91	0.67	0.8	0.88	0.88	0.91	0.82
MKL1	8.9	UC	rs56182212	7.88	0.17	0.54	0.23	0.36	0.08	0	0.62	0.23
FOXP1	8.6	VF	rs11709093	8.15	0.13	0.77	0.54	0.61	0.24	0.01	0.79	0.46
ACSS2	8.4	AN	rs7509557	8.39	0.13	0.57	0.3	0.26	0.44	0.35	0.75	0.39
TRABD	8	UC	rs28668373	7.96	0.21	0.14	0.4	0.31	0.35	0.44	0.17	0.25
STXBP3	8	AN	rs2358709	8.02	0.07	0.57	0.76	0.78	0.8	0.81	0.37	0.18
ENDOU	8	VF	rs2239187	8.02	0.28	0.02	0.16	0.13	0.04	0.24	0	0.16
CMS: composite of multiple signals (CMS)
Daf: Derived allele frequency

[truncated: 2 more sheets: k, l]
